# Supplementary material for: Comprehensive identification and expression analysis of FAR1/FHY3 genes under drought stress in maize (Zea mays L.)
Source: PeerJ journal article supplement (doi:10.7717/peerj.17684), 2024-06-28
Supplement: raw_data.zip [file raw_data.zip]

## Sheet: sequence
protein ID	No.	rename	protein sequence	protein length	CDS	CDS sequence	CDS length	cdna	cdna sequence	cdna length	gene name	chromosome	start position	end position	UP-2000 sequence	length
GRMZM2G001663_P01	1	ZmFAR01.1	MEGTVIRIASESKRGNEQTDSLTEVPRAIGTLVTHNREVENLIVLEDDTELTPYEGMEFESEDAARDFYSTYARSAGFRIRISRYTRSRRDNSVISRRIVCSKEGFHETRACDGLHPEQKQQERAGTRVGCKAMILIKKFSPGKWVVTKFIKNHNHGPVPPRKLDSRLVDQDCDPMEKPHSIEVDPVEEPFEGMEFESEEAAKLFYVNYARLNGFRARISRYCRSRRDNSIISRQIVCSKEGFREVRTKKVLTDEGKTKRPRMITRVGCKAMIVVKKMNSGKWMVSKFEKEHNHSLSYSKMVPSTSNITSGEIVDLAAKGAHPSEVKNEGYSAGTQCNPADSLTILYNNLCQEAIKFAKEGSVTEEIYHVAVSALKEAAEKVAEVKRSRPTLSHCGFVR…	666	GRMZM2G001663_T01	ATGGAAGGGACAGTAATCAGAATAGCTAGTGAGTCAAAACGAGGCAATGAGCAAACAGACTCTTTGACAGAGGTGCCTAGAGCTATTGGGACTTTAGTAACACATAATCGTGAAGTAGAAAACTTAATTGTACTTGAAGATGACACGGAATTAACACCTTATGAAGGAATGGAGTTTGAGTCTGAAGATGCTGCAAGGGATTTCTACAGCACATATGCAAGAAGTGCAGGTTTTCGGATTCGGATCAGCAGGTATACTCGCTCCCGACGTGATAATTCAGTTATTTCTCGTCGAATTGTGTGTTCAAAAGAGGGATTTCATGAAACCCGTGCTTGTGATGGCCTCCATCCTGAACAAAAACAACAAGAACGGGCAGGTACTAGAGTTGGTTGCAAGGCA…	2001	GRMZM2G001663_T01	GTCCGCTTTCTTTAATCAATCCTCCGCGCCCCACAACCCCAAGCAACTCCCACTAATCGTCCCCTTTCCTTCCCTTTCCCGGCGGGGGCAACAATGGTCGGTGACGGCGATCGGTTTGCTGCATCGGCGGTTCCTGCGGCGCCGTGCAGGTTTCTCGGTCACCTGTGAGCTCGATTTGACCGCCCCCACCTGGCGTCGTGCTGGTTCCGTTCTGGGTATTCTTGGCGCTGGTCTGGGCTCTGGGGCGATCGGGACACACCTCCGCTCTGCTTATCGAGGGTCGAGGCACCCGACGATCTTCTCCGGAAAAGCGCCCTACTCTTCATACCATCAGGTAGGGCCATATCTGAACAACTTCTGAGTACAGTGAGTGTCCTGATAAACAGATATGTAACTATG…	2884	GRMZM2G001663	1	35738669	35743639	CTTGGCATCCACGGCCGCGCGCGCGGTTCTCCGCCGTCCGTTTCGTGGCTCCGGAGATCCGGCCTCATCCGCCCCGCCCCGCCCGCCTCCCGGCCTCGTCGTCTCCTCGTCCCCCCACTCCCGTCTCGTCCGCTTTCTTTAATCAATCCTCCGCGCCCCACAACCCCAAGCAACTCCCACTAATCGTCCCCTTTCCTTCCCTTTCCCGGCGGGGGCAACAATGGTCGGTGACGGCGATCGGTTTGCTGCATCGGCGGTTCCTGCGGCGCCGTGCAGGTTTCTCGGTCACCTGTGAGCTCGATTTGACCGCCCCCACCTGGCGTCGTGCTGGTTCCGTTCTGGGTATTCTTGGCGCTGGTCTGGGCTCTGGGGCGATCGGGACACACCTCCGCTCTGCTT…	2000
GRMZM2G463730_P01	2	ZmFAR02.1	MVDRAAARAQAVSSDPPPPALLEPDPRLSQPGAADGQEVASAGATAGPPSLPQASDAEEDALASPAGQPGERCRAMMEVVAKDGAWKVTKLVVEHCHELQVAPGHVAVTVPALGMEFDSVDDAKGFYYGYGEQVGFKARMGSNRRSVGDGEKILQRFLCWKGNYANRSRCKDSDAGKETDEVLEGLSAAAGKRKREPYKTRSRNPGRSTEVIEVEKGVGLGGAGNGLELDNGRRSRRGRSKKAEVEHGEDSVVGFEAEEVAKAVSDADEEEDEGDEDQEAAEQEVEVEVKEQRARGRPRKAVMEDNALQARVLRELGVRALQYNNEERKKILNKYRSKRQSRSVSSRPTKISSRQALAERRKRGNGGRFLSSEEQPLPSERRSKRLKKQNLKMQKAESK…	1198	GRMZM2G463730_T01	ATGGTCGATCGTGCCGCCGCGCGGGCACAGGCGGTGAGCTCCGACCCGCCGCCGCCTGCACTGCTGGAGCCCGACCCGCGGCTCAGCCAGCCCGGGGCCGCTGATGGGCAAGAGGTCGCTTCGGCGGGTGCGACCGCGGGTCCGCCTTCCCTGCCCCAGGCCAGCGACGCTGAGGAAGACGCTCTTGCCTCGCCAGCGGGGCAGCCGGGCGAGCGGTGCAGAGCGATGATGGAGGTGGTGGCCAAAGACGGGGCGTGGAAGGTGACCAAGCTGGTGGTGGAGCACTGCCACGAGCTGCAGGTCGCCCCCGGACATGTCGCGGTGACCGTGCCAGCGTTGGGGATGGAATTCGACTCCGTAGACGACGCCAAGGGGTTCTACTATGGCTACGGCGAGCAG…	3597	GRMZM2G463730_T01	AAATCCCGCTCGAACCCTAGTAACTACCTACCCCGCATGGTCGATCGTGCCGCCGCGCGGGCACAGGCGGTGAGCTCCGACCCGCCGCCGCCTGCACTGCTGGAGCCCGACCCGCGGCTCAGCCAGCCCGGGGCCGCTGATGGGCAAGAGGTCGCTTCGGCGGGTGCGACCGCGGGTCCGCCTTCCCTGCCCCAGGCCAGCGACGCTGAGGAAGACGCTCTTGCCTCGCCAGCGGGGCAGCCGGGCGAGCGGTGCAGAGCGATGATGGAGGTGGTGGCCAAAGACGGGGCGTGGAAGGTGACCAAGCTGGTGGTGGAGCACTGCCACGAGCTGCAGGTCGCCCCCGGACATGTCGCGGTGACCGTGCCAGCGTTGGGGATGGAATTCGACTCCGTAGAC…	4138	GRMZM2G463730	1	283389452	283396343	CCGCCAATTTTTACCGGGAAACCAGATTTAATGCCAAGATTGAGTATTTAGTGGTCACTTTAGGCATATTAGCCTTGTTTACTGTTATATACTATATGTGAAGATGTTATATTCTATATGTGAAGATGAAACTCGTAGCTCAAGTCCAGTTTAGGCATTTATGGTCAATTTTGGTTTTATTTCCTGTCTAAGATGGAATCCATAGATCAAGTAGCTTCAGTTCTTCTAATAACTATCCGTTTGGACAAGACTCAATCTAGAACCCTTAGCTCAAGTTCTTCTGTATGTGTTCCTAAGATTTGCTGATCAGGAGAAAAGTCCAACACTTGGTGAGGCGCACATGCAATACACAAACACCAAACACACATACCAATATGCTTTTTTGCTTTGTGGATAACT…	2000
GRMZM2G463730_P02	3	ZmFAR02.2	MVDRAAARAQAVSSDPPPPALLEPDPRLSQPGAADGQEVASAGATAGPPSLPQASDAEEDALASPAGQPGERCRAMMEVVAKDGAWKVTKLVVEHCHELQVAPGHVAVTVPALGMEFDSVDDAKGFYYGYGEQVGFKARMGSNRRSVGDGEKILQRFLCWKGNYANRSRCKDSDAGKETDEVLEGLSAAAGKRKREPYKTRSRNPGRSTEVIEVEKGVGLGGAGNGLELDNGRRSRRGRSKKAEVEHGEDSVVGFEAEEVAKAVSDADEEEDEGDEDQEAAEQEVEVEVKEQRARGRPRKAVMEDNALQARVLRELGVRALQYNNEERKKILNKYRSKRQSRSVSSRPTKISSRQALAERRKRGNGGRFLSSEEQPLPSERRSKRLKKQNLKMQKAESK…	1202	GRMZM2G463730_T02	ATGGTCGATCGTGCCGCCGCGCGGGCACAGGCGGTGAGCTCCGACCCGCCGCCGCCTGCACTGCTGGAGCCCGACCCGCGGCTCAGCCAGCCCGGGGCCGCTGATGGGCAAGAGGTCGCTTCGGCGGGTGCGACCGCGGGTCCGCCTTCCCTGCCCCAGGCCAGCGACGCTGAGGAAGACGCTCTTGCCTCGCCAGCGGGGCAGCCGGGCGAGCGGTGCAGAGCGATGATGGAGGTGGTGGCCAAAGACGGGGCGTGGAAGGTGACCAAGCTGGTGGTGGAGCACTGCCACGAGCTGCAGGTCGCCCCCGGACATGTCGCGGTGACCGTGCCAGCGTTGGGGATGGAATTCGACTCCGTAGACGACGCCAAGGGGTTCTACTATGGCTACGGCGAGCAG…	3609	GRMZM2G463730_T02	AAATCCCGCTCGAACCCTAGTAACTACCTACCCCGCATGGTCGATCGTGCCGCCGCGCGGGCACAGGCGGTGAGCTCCGACCCGCCGCCGCCTGCACTGCTGGAGCCCGACCCGCGGCTCAGCCAGCCCGGGGCCGCTGATGGGCAAGAGGTCGCTTCGGCGGGTGCGACCGCGGGTCCGCCTTCCCTGCCCCAGGCCAGCGACGCTGAGGAAGACGCTCTTGCCTCGCCAGCGGGGCAGCCGGGCGAGCGGTGCAGAGCGATGATGGAGGTGGTGGCCAAAGACGGGGCGTGGAAGGTGACCAAGCTGGTGGTGGAGCACTGCCACGAGCTGCAGGTCGCCCCCGGACATGTCGCGGTGACCGTGCCAGCGTTGGGGATGGAATTCGACTCCGTAGAC…	4174	GRMZM2G463730	1	283389452	283396343	CCGCCAATTTTTACCGGGAAACCAGATTTAATGCCAAGATTGAGTATTTAGTGGTCACTTTAGGCATATTAGCCTTGTTTACTGTTATATACTATATGTGAAGATGTTATATTCTATATGTGAAGATGAAACTCGTAGCTCAAGTCCAGTTTAGGCATTTATGGTCAATTTTGGTTTTATTTCCTGTCTAAGATGGAATCCATAGATCAAGTAGCTTCAGTTCTTCTAATAACTATCCGTTTGGACAAGACTCAATCTAGAACCCTTAGCTCAAGTTCTTCTGTATGTGTTCCTAAGATTTGCTGATCAGGAGAAAAGTCCAACACTTGGTGAGGCGCACATGCAATACACAAACACCAAACACACATACCAATATGCTTTTTTGCTTTGTGGATAACT…	2000
GRMZM2G155980_P01	4	ZmFAR03.1	MTVSYRPQEFVRVIPPLIGSWISRGPSMMEVGLNPGEELDFGDNQEDDDDAGDISPASKELAAMVAAAAAAETVELDDGGAGVEAAASAAAAASSSSAAARYGDDRTPRDGMVFKSYEEVLNFYKRYALRTGFGVCVKKSSFTKAGLCRRLVLVCNKWGNGKEDACYQARPTAKTNCQATVVARLLGDDLLHLTDVNLEHNHALNPSAARFLRCYKTLPSGLSKDLVVRAARGECSVAGDIDVPIFDEWGRLKTGQADVLAINAFFTQMQAKLPNSFYVMDFYVEGHLRSVLWADSRSRAAYQYFSDAVWIDTACLRNKYHVPLVSFLGVNHHGQLVLLGCGLLSDESTESFLWLFKSWLTCMKGQPPNAIVTDECVAIKAAVREVFPKTRHRISDWHV…	863	GRMZM2G155980_T01	ATGACTGTATCCTATCGTCCCCAAGAGTTTGTTCGCGTGATTCCGCCTCTGATTGGGTCGTGGATCAGCAGGGGGCCAAGCATGATGGAGGTGGGTTTGAACCCGGGGGAGGAGCTGGACTTCGGGGACAACCAGGAGGACGACGACGACGCGGGGGACATCTCACCCGCCAGCAAGGAGCTGGCCGCCATGGTGGCGGCGGCGGCGGCGGCGGAGACAGTCGAGCTTGACGACGGCGGCGCCGGTGTCGAGGCGGCCGCCTCCGCTGCCGCCGCCGCGTCGTCGTCGTCAGCGGCGGCGCGGTACGGGGACGACCGCACGCCGCGGGACGGGATGGTGTTCAAGTCCTACGAGGAGGTGCTCAACTTCTACAAGCGCTATGCCCTGCGCACGGGCTTC…	2592	GRMZM2G155980_T01	ATGACTGTATCCTATCGTCCCCAAGAGTTTGTTCGCGTGATTCCGCCTCTGATTGGGTCGTGGATCAGCAGGGGGCCAAGCATGATGGAGGTGGGTTTGAACCCGGGGGAGGAGCTGGACTTCGGGGACAACCAGGAGGACGACGACGACGCGGGGGACATCTCACCCGCCAGCAAGGAGCTGGCCGCCATGGTGGCGGCGGCGGCGGCGGCGGAGACAGTCGAGCTTGACGACGGCGGCGCCGGTGTCGAGGCGGCCGCCTCCGCTGCCGCCGCCGCGTCGTCGTCGTCAGCGGCGGCGCGGTACGGGGACGACCGCACGCCGCGGGACGGGATGGTGTTCAAGTCCTACGAGGAGGTGCTCAACTTCTACAAGCGCTATGCCCTGCGCACGGGCTTC…	3145	GRMZM2G155980	1	297376151	297380168	CGTCCCATCCCATCTCTTTCATCTTTTCCTTTTTTTATCTAGGTGCCCGTTCGAATCGTGCGCCATCTCGAAGCCTCCGGTGGCCTCAGCCTCTATGTTGTATGGCTCAAGCGACCCTGACTCTACATCTCAGACCGAACGACGTAAAATAATACAAGCTACGTGGACAGACTACCCGTGCGTCTTTGCGTTGTGGTTCTAATCGTGCGCCATCTCGAAGCCTCCGGTGGCCTCAGCCTCTATGGTGTATGGCTCAAGCGACCCTAGCTCTACATCTCAGATCGAACGACGTAAAATAATACAGGCTACGTGGATAGATTGCCTTTGCGTCTTTGCGCCGGTGGCCTCAGCCTCTATGGTGTATGGCTCAAGCGACCCTGGCTCTACATCTCAGATCGA…	2000
GRMZM2G155980_P02	5	ZmFAR03.2	MTVSYRPQEFVRVIPPLIGSWISRGPSMMEVGLNPGEELDFGDNQEDDDDAGDISPASKELAAMVAAAAAAETVELDDGGAGVEAAASAAAAASSSSAAARYGDDRTPRDGMVFKSYEEVLNFYKRYALRTGFGVCVKKSSFTKAGLCRRLVLVCNKWGNGKEDACYQARPTAKTNCQATVVARLLGDDLLHLTDVNLEHNHALNPSAARFLRCYKTLPSGLSKDLVVRAARGECSVAGDIDVPIFDEWGRLKTGQADVLAINAFFTQMQAKLPNSFYVMDFYVEGHLRSVLWADSRSRAAYQYFSDAVWIDTACLRNKYHVPLVSFLGVNHHGQLVLLGCGLLSDESTESFLWLFKSWLTCMKGQPPNAIVTDECVAIKAAVREVFPKTRHRISDWHV…	870	GRMZM2G155980_T02	ATGACTGTATCCTATCGTCCCCAAGAGTTTGTTCGCGTGATTCCGCCTCTGATTGGGTCGTGGATCAGCAGGGGGCCAAGCATGATGGAGGTGGGTTTGAACCCGGGGGAGGAGCTGGACTTCGGGGACAACCAGGAGGACGACGACGACGCGGGGGACATCTCACCCGCCAGCAAGGAGCTGGCCGCCATGGTGGCGGCGGCGGCGGCGGCGGAGACAGTCGAGCTTGACGACGGCGGCGCCGGTGTCGAGGCGGCCGCCTCCGCTGCCGCCGCCGCGTCGTCGTCGTCAGCGGCGGCGCGGTACGGGGACGACCGCACGCCGCGGGACGGGATGGTGTTCAAGTCCTACGAGGAGGTGCTCAACTTCTACAAGCGCTATGCCCTGCGCACGGGCTTC…	2613	GRMZM2G155980_T02	ATGACTGTATCCTATCGTCCCCAAGAGTTTGTTCGCGTGATTCCGCCTCTGATTGGGTCGTGGATCAGCAGGGGGCCAAGCATGATGGAGGTGGGTTTGAACCCGGGGGAGGAGCTGGACTTCGGGGACAACCAGGAGGACGACGACGACGCGGGGGACATCTCACCCGCCAGCAAGGAGCTGGCCGCCATGGTGGCGGCGGCGGCGGCGGCGGAGACAGTCGAGCTTGACGACGGCGGCGCCGGTGTCGAGGCGGCCGCCTCCGCTGCCGCCGCCGCGTCGTCGTCGTCAGCGGCGGCGCGGTACGGGGACGACCGCACGCCGCGGGACGGGATGGTGTTCAAGTCCTACGAGGAGGTGCTCAACTTCTACAAGCGCTATGCCCTGCGCACGGGCTTC…	2991	GRMZM2G155980	1	297376151	297380168	CGTCCCATCCCATCTCTTTCATCTTTTCCTTTTTTTATCTAGGTGCCCGTTCGAATCGTGCGCCATCTCGAAGCCTCCGGTGGCCTCAGCCTCTATGTTGTATGGCTCAAGCGACCCTGACTCTACATCTCAGACCGAACGACGTAAAATAATACAAGCTACGTGGACAGACTACCCGTGCGTCTTTGCGTTGTGGTTCTAATCGTGCGCCATCTCGAAGCCTCCGGTGGCCTCAGCCTCTATGGTGTATGGCTCAAGCGACCCTAGCTCTACATCTCAGATCGAACGACGTAAAATAATACAGGCTACGTGGATAGATTGCCTTTGCGTCTTTGCGCCGGTGGCCTCAGCCTCTATGGTGTATGGCTCAAGCGACCCTGGCTCTACATCTCAGATCGA…	2000
GRMZM2G034868_P01	6	ZmFAR04.1	MEGTTISIEIDGEAICLDSVGDNEQEAAENGEMHQTIYTDENGEQVAFDNQEQGREEDLAGNGEEDRDHNSIIPSREELTEELRNKVAYSEEEAYRLYCDYGHRMGFSVRKGKQYYFTGTKTIRTKDYYCSKEGLKDDEQLTEANFNKPETRTNCKAMVRFRVDSEGQWRVIQIIPEHNHELVRPEEIHLLRSVRTLSVPKSGVLNAMVNAEIQAMHDNLHINEDGTECHSQLSIRSYTLLEPKECEALVGYFKRRTNEQCMFYWDVEVDQEGRMTNFFWRDGKSRVDYDSFRDVVIFDTSYLTNKYNMICAPFIGLNNHRQNVMFGCAFLLDESLTSYEWLFKSFLESVGGRPPETIFTDQNEFISKAIEVVLPGTRHCLCQQLIEKKLMSHLGSIND…	817	GRMZM2G034868_T01	ATGGAAGGTACTACCATTTCTATTGAGATTGATGGGGAGGCCATCTGTCTTGACAGTGTCGGAGATAATGAACAAGAAGCTGCGGAGAATGGAGAAATGCACCAAACAATTTACACTGATGAAAATGGGGAACAAGTAGCCTTTGACAACCAAGAACAGGGGAGGGAGGAAGATCTGGCAGGAAATGGAGAAGAGGATAGGGACCATAATTCTATCATTCCAAGCCGTGAGGAGTTGACTGAAGAATTAAGAAATAAAGTCGCATATAGTGAGGAAGAAGCTTACAGGTTGTACTGTGACTATGGGCACCGCATGGGCTTTAGTGTTCGAAAAGGAAAGCAGTACTACTTTACTGGAACCAAAACCATCCGTACTAAAGATTATTACTGCTCAAAAGAA…	2454	GRMZM2G034868_T01	TTCGCGGAGAACAGCGCGTCAGCGCCTACGGCTTCTGCTTGTCTCTCCCGTTCCACTCCAAACCCTAGGGGCGAATCTCCGGCTAATCGGCGGCGGGCGCAGCCACGCTGTCTGTGCAGGGCTTGTGCGGCCTTAGGACGCAGGGGCGTTGCTTGGGGCTCCCGGTGGGTGGCTACGAAGGGCTGTGGCGGCCCGCGGCCAGGGGCAAGTCGGCAGCGGCAAGCAACCGGGGTGCTGGGCGTGGGTGGGCTGCTGGGACGCCTGCGGCAGCGGTAAAAAGTCGAGCCTCGACCGTCCTGAGGCAGGAGCAGAGCAGCTGAGCTGGTTTGGTACTCTGTTGATTCTCCATTGGAGACACTAGGTGTGCCAATTTTGATGGAAGGTACTACCATTTCTATT…	3377	GRMZM2G034868	3	142975242	142986336	AATAAAAAAACACTTTGACTTAGCATTTTACTCTAGCTCCATGAATGATAGATTTTTAGGGGAAATCTCTCTTATATCCTTGTTTTAAAGACCCATATGTAGGTGACCCAACTCTATCGTTTATCTGTCCCATCCCACTCACACAGTATTCTCTCTCGATGGAACGATGCGAGGCATGAGGTAGCAGTCTCCATCCTCACTGACGCAGATCGAGGAGCGGCGGGGTGGGCTACCCGATTGTTCACGAGGAGGTGTGTGGGGATGAGCCCACCGATCGACCATGAGGAGAGGTAGGGGTGAGCCCACCGGCTGGCCGCGAGGAGGATCTGCGGGGGTGAGCTGCCTGCTGGCGTGGAGGAGGCGCGCGGTGGGGGGAGCCGCTCGAGCCCGGCCGATGGC…	2000
GRMZM2G034868_P02	7	ZmFAR04.2	MTLSLFTTLPSTPPSVLCHHHQLRSSSFAFSVMEGTTISIEIDGEAICLDSVGDNEQEAAENGEMHQTIYTDENGEQVAFDNQEQGREEDLAGNGEEDRDHNSIIPSREELTEELRNKVAYSEEEAYRLYCDYGHRMGFSVRKGKQYYFTGTKTIRTKDYYCSKEGLKDDEQLTEANFNKPETRTNCKAMVRFRVDSEGQWRVIQIIPEHNHELVRPEEIHLLRSVRTLSVPKSGVLNAMVNAEIQAMHDNLHINEDGTECHSQLSIRSYTLLEPKECEALVGYFKRRTNEQCMFYWDVEVDQEGRMTNFFWRDGKSRVDYDSFRDVVIFDTSYLTNKYNMICAPFIGLNNHRQNVMFGCAFLLDESLTSYEWLFKSFLESVGGRPPETIFTDQNEFIS…	772	GRMZM2G034868_T02	ATGACGCTGTCTCTGTTCACAACTCTTCCGAGCACGCCGCCGTCAGTCCTTTGTCATCATCATCAGCTCAGATCTAGCAGCTTCGCCTTCTCAGTGATGGAAGGTACTACCATTTCTATTGAGATTGATGGGGAGGCCATCTGTCTTGACAGTGTCGGAGATAATGAACAAGAAGCTGCGGAGAATGGAGAAATGCACCAAACAATTTACACTGATGAAAATGGGGAACAAGTAGCCTTTGACAACCAAGAACAGGGGAGGGAGGAAGATCTGGCAGGAAATGGAGAAGAGGATAGGGACCATAATTCTATCATTCCAAGCCGTGAGGAGTTGACTGAAGAATTAAGAAATAAAGTCGCATATAGTGAGGAAGAAGCTTACAGGTTGTACTGTGACTAT…	2319	GRMZM2G034868_T02	GTCCGGCCTCCAGACATCAGGCAGCTCTCCCGAGCATGACGCTGTCTCTGTTCACAACTCTTCCGAGCACGCCGCCGTCAGTCCTTTGTCATCATCATCAGCTCAGATCTAGCAGCTTCGCCTTCTCAGTGATGGAAGGTACTACCATTTCTATTGAGATTGATGGGGAGGCCATCTGTCTTGACAGTGTCGGAGATAATGAACAAGAAGCTGCGGAGAATGGAGAAATGCACCAAACAATTTACACTGATGAAAATGGGGAACAAGTAGCCTTTGACAACCAAGAACAGGGGAGGGAGGAAGATCTGGCAGGAAATGGAGAAGAGGATAGGGACCATAATTCTATCATTCCAAGCCGTGAGGAGTTGACTGAAGAATTAAGAAATAAAGTCGCATATA…	2441	GRMZM2G034868	3	142975242	142986336	GCAAAACATCCACATTATGCCAGAATGACAGACTATAACGATGTATCTGATCGATGAAAAATCCCTGATGGATTACGATCTTAGATGGACTTTTGTGACACCATCATAGATGTTGCAATGGATGAACGCCTCGAGCGATGTGTCATATTTAGAATATGTACTATTGCAACTATATTATCCCCTAAGTCCTATTGAAGGACATGTTATTTGCTTTGCACAACTATGTATAAATTGTGGTGTAAGATAGAAAATGATAGCACCCCAACCTCATCCATTCTCGTTATTCCAGATGAACAATGAGACATATATCTTGAAGAATATGCTTGAGTTATGAGGGATAACGACTTTAACAGATGTCATCGTCAGGGGGAGCGAATGCTTATATTGATCACAACCGTG…	2000
GRMZM2G302323_P01	8	ZmFAR05.1	MMEPQVVDLEDDSINFWASLGVSPHVDQMPLHSVHIVDHQAQSALAAAAAAIQPQSVCRDLFPVESDACLEPRLGMEFESGEAAKTFYIAYAGRVGFSVRIARSRKSKCSESIIMLRFVCSREGFSKEKRVVTAGKKTRKRPASIREGCNAMLEVLRRGDSKWIVTKLVKEHNHEVGLPSRVQYIAIESDTVVDPYIGMEFESLESAKTFYYSYASRVGFEARVRQSRKSQDESLKMLKLVCSRHRYHSGRESNGEDTKRVRAMDPSRDGCDALFEIIRKGKDTWTVSKLILEHTHELKPAPASRVHCVRSQGEVLVIANNFSDTRNLLLNGQDSQHPREVRYNDLGPEDAQSLFEYLKKRQEEDPSFFYAVQYEKNGHSTNIFWADAKARMAYYHFGD…	850	GRMZM2G302323_T01	ATGATGGAGCCCCAAGTGGTGGACCTCGAGGATGACAGCATCAACTTCTGGGCCTCCCTCGGCGTCAGCCCCCACGTGGACCAGATGCCGCTGCACAGCGTCCATATTGTCGACCACCAAGCTCAGTCAGCGCTGGCAGCTGCGGCTGCGGCGATACAGCCGCAGTCCGTCTGCAGGGACCTCTTCCCGGTGGAGTCCGACGCCTGCCTGGAGCCTCGGCTGGGGATGGAGTTTGAGTCCGGTGAGGCTGCCAAGACCTTCTACATTGCCTATGCTGGCCGTGTTGGTTTCTCTGTTCGCATTGCCCGGTCACGCAAGTCTAAGTGCAGTGAGTCCATAATCATGCTAAGATTTGTGTGCTCAAGGGAAGGGTTCAGTAAGGAGAAACGTGTGGTCACA…	2553	GRMZM2G302323_T01	GCGAAAGTAACGCAAAGGAGCCGCTGTCGGTAGCAGCCGCCGCCGCTGGTAGAGCTTAAACAGCCTCAAGGATCCAGAGGGTTCTTGGCCCCCATTTCCGCAATTGTTGCCACCTGCTTTTAGTTCCCATTTCCTCAATTGGGGCCATCTGCTTTTAGTTCCTCTTCTTCACTCGCGGAGTTATCAAAGCTTCAGATTTCTTGCTTCTCCGCGGCAGTTTGCTAGGGGTCGGAGTGCCGGAGCCAGAGCCACGCGGGAGTTTGAGCTGGATTGGTTCTTCAATTGAGCGTGGCGGCCGGCGTCAGGTAGAAGTTTCCATGGTTCTTGGTTTGTTGTTGGAGTGTAGGAGATAACACGGGGAAGGAGATTGCGGGAGGGTAACGGAGGTCGGGGAGCTGG…	3193	GRMZM2G302323	4	30795954	30799228	GGTACCTTGGACTACATCTCCATTGAACCAACCTTGCTAGACCAAATTATTATGGCCCAGCTTGGTGATAAGGGAGTGCAAATCATCAAGGAAATGCTTAACCAGAAGATTAAAAAGTATAAGTGTTTCCGCCAAGACAGTAAGGGAACATTATGGTTCGAAGACCGACTTGTAGTTCCCAAAAATGAGGACCTCAGGAGAAAATTTTTGGATGAGGCCCACCTCTCCAAATTCTCCATACATCCGGGAAGCGACAAGATGTACCATGACCTAAAACCCCTGTACTGGTGGACAAGGATGAAGAGGGAAATAACCAAGTATGTGTCAGAGTGTGATACCTGTCGGAGAATAAAGGCAAGTCACCTGAAGTCGGCTGATGCCTTGCAACCCCTCTCTATA…	2000
GRMZM2G043250_P01	9	ZmFAR06.1	MSHVEPAAAGVDQVGEGTVVPHDNGVSGTGGDVATTEAQVAVAVSTSGDERRGDYGDDAENEEEEEAATVQGSKEGTDELLRKVVCSEEAAYKLYCDYGHRMGFSIRKGKQSYFTGTKRIRTKDYFCSKEGLKEGEKLTDANFNDPHTRTNCRAMVRFRVNDQGEWKVIRLVSDHNHNLARPEERHLLRSARSLIAGRSSSVENQKQDLLLGYGAATKTLTIGTGDVQSLVSHLKSRANEDGMFYWDVQLDRGGRMTNFFWRDGRSRTDYDCFCDVVVFDSTYRLSKHNLICAPFVGVNHHWQTTMYGCALLADESTSAFVWLFKSFLESMGNRHPQSIFTNLDQVVTKAVEEVFPNARHRIAHWHIQKNAHSRLGALNVSKTFNKMFTKCIQGCDSEA…	687	GRMZM2G043250_T01	ATGTCGCACGTCGAGCCCGCCGCCGCCGGAGTGGACCAAGTCGGCGAGGGGACGGTCGTGCCGCACGACAACGGTGTCAGCGGCACCGGGGGTGACGTGGCCACCACGGAAGCGCAAGTGGCTGTTGCCGTTTCCACCTCCGGCGACGAGAGGCGGGGGGATTACGGCGATGATGCAGAGAACGAGGAGGAGGAGGAGGCCGCAACGGTGCAGGGCAGCAAGGAGGGCACTGACGAGCTGCTCCGGAAGGTGGTGTGCAGCGAAGAGGCCGCCTACAAGCTCTACTGCGATTACGGCCACCGCATGGGGTTCAGCATCCGGAAAGGGAAGCAGTCCTACTTCACCGGCACCAAGCGGATACGCACCAAGGACTACTTCTGCTCCAAGGAGGGGCTCAAG…	2064	GRMZM2G043250_T01	CTGACTCGGGTGCCCCTTCCCCATGTCGCACGTCGAGCCCGCCGCCGCCGGAGTGGACCAAGTCGGCGAGGGGACGGTCGTGCCGCACGACAACGGTGTCAGCGGCACCGGGGGTGACGTGGCCACCACGGAAGCGCAAGTGGCTGTTGCCGTTTCCACCTCCGGCGACGAGAGGCGGGGGGATTACGGCGATGATGCAGAGAACGAGGAGGAGGAGGAGGCCGCAACGGTGCAGGGCAGCAAGGAGGGCACTGACGAGCTGCTCCGGAAGGTGGTGTGCAGCGAAGAGGCCGCCTACAAGCTCTACTGCGATTACGGCCACCGCATGGGGTTCAGCATCCGGAAAGGGAAGCAGTCCTACTTCACCGGCACCAAGCGGATACGCACCAAGGACTACTT…	2317	GRMZM2G043250	5	171564949	171567349	CACCAAGCATCCTTTGAGCACTATTGATCACTCACACATCATTCTTGCGCACTTGTTCGACATTCTAGTGATTTGAGCTCCGTTCTAGTGTGCTAGTCTTTTTGAGCTCAAGTCTGGGTCTTGTGTGTGCGTATTCGCTGTGATCTTTGTGTCCTGTGTGAGTTGCTAATCCCTCCCTTGCTCTGTGCTTCTTTGTGAACTTCAAGTGTAAGGGCGAGAGGCTCCAAAGTGTGGAGATTCCTCGCAAACGGGATTAAGAAAAGCAAAGCAAAACACCGTGGTATTCAAGTGGGTCTTTGGACCGCTTGAGAGGGGTTGATTGCAACCCTCGTCCGTTGGGACGCCACAACATGGAGTAGGCAAGCGTTGGTCTTGGCCGAACCACGGGATAACCACCGT…	2000
GRMZM2G117108_P01	10	ZmFAR07.1	MSHGVPAPMLEELAREATLADVSILVDGNDAELHVHGNGAEVHDNGTELHGNGAVLKRVEMPQDLGAISAKEVPLHEGKEVILVDDNDSGQEDDAEGKVDENTPRVGLRFKTYDDALKYYKQYAEDSGFSAIILKSSYLKSGVCRRLVIGCSRAGRGRANACYLSRESTKINCPARISLKLRQDRWLHIDDAKLEHNHPYNQSTTSLINCYKKLTDAKNGVSASRLKGRRNIPAEKEQGNFTEIGRLKFGEGDDEYIQKFFGNMQNKNPYFFYLVDLDNQGRLRNLFWSDARSRAANDYFGHDVVYFDTSYLTEKYDLPLVFFTGMNNHGQPVLFGTALLSDLSVDSYAWLLRAFLSCMKGLCPKAIITEHYNAIMDAVQEVLPEVRHRLCLYRIMKDV…	879	GRMZM2G117108_T01	ATGTCCCATGGTGTGCCCGCCCCCATGTTAGAAGAGTTGGCGAGGGAGGCAACACTCGCCGATGTGTCTATTCTTGTAGATGGGAATGACGCAGAGCTACATGTACATGGCAATGGCGCAGAGGTACATGATAATGGCACAGAGTTACATGGCAATGGTGCAGTGCTGAAAAGAGTTGAAATGCCCCAGGATTTGGGAGCGATTTCAGCCAAGGAGGTGCCGCTGCATGAGGGCAAGGAGGTGATACTTGTGGATGATAATGACAGCGGGCAGGAAGATGATGCAGAGGGTAAGGTGGATGAGAACACACCTCGTGTTGGGCTGAGATTCAAAACTTATGATGACGCTCTCAAGTACTATAAACAATATGCTGAGGATTCTGGGTTTTCAGCAATCATT…	2640	GRMZM2G117108_T01	CCACGCCGCCGTCCTCCGCACCGTCCACGCCGCCGTCCTCCGACCACCGCGACTCTGCCGCAGCCGCCCTCTGCACCGTCCTCGCCGCGCACCACCGCGACTCTGACCGTGGCCCGCAGTCCTGCCTCGCTGCCAGTACTGAGCCCGCAGGCGGCGCCCGCAGCCGAGCCGGAGGTCGCCAGCGCCGCCAGAAGACTTGCTTCGAGGGATTCCCTACGGGCTCAAGGTCAATCAGGTGTGGTCGCAGTTTTCCATTTTTAGGGTTCAGCTAAACTGGCCCCCCATGTCCCATGGTGTGCCCGCCCCCATGTTAGAAGAGTTGGCGAGGGAGGCAACACTCGCCGATGTGTCTATTCTTGTAGATGGGAATGACGCAGAGCTACATGTACATGGCAATGG…	3294	GRMZM2G117108	5	182810298	182816922	TCACATGGCCCCAAGGGGATTCAGACCCATGACCCCCCATTCCCCCGTACAACCCAGGTCTAGCTAAAATTTAAAAACACATATGGTCCCAAGGGGATTCGAACCTATGACCCCTTAGGCAAATGCGAGCAGTAGCTACCGCTACACCACATGTGTGTTTATGTCTACATCTATGACATGAAAAACATCTATTACATCTCTCCCCAAGACCATCTGCTACCTTTGCACAATGCGTTGTAGTAGATAAGTATCATCGAAATTCTTGAATTATATTTTTGGATGGAGAGAGTAGTATTTAAAGAATAGCCTTGTATGCAATTTCTTTTGTTTGAATAATGTTTTTAACTTAAATTCCTTTTTTTGCATGTGTGGCATTTATTCTCCGTAATATATTTTCCA…	2000
GRMZM2G117108_P02	11	ZmFAR07.2	MSHGVPAPMLEELAREATLADVSILVDGNDAELHVHGNGAEVHDNGTELHGNGAVLKRVEMPQVREVYDLGAISAKEVPLHEGKEVILVDDNDSGQEDDAEGKVDENTPRVGLRFKTYDDALKYYKQYAEDSGFSAIILKSSYLKSGVCRRLVIGCSRAGRGRANACYLSRESTKINCPARISLKLRQDRWLHIDDAKLEHNHPYNQSTTSLINCYKKLTDAKNGVSASRLKGRRNIPAEKEQGNFTEIGRLKFGEGDDEYIQKFFGNMQNKNPYFFYLVDLDNQGRLRNLFWSDARSRAANDYFGHDVVYFDTSYLTEKYDLPLVFFTGMNNHGQPVLFGTALLSDLSVDSYAWLLRAFLSCMKGLCPKAIITEHYNAIMDAVQEVLPEVRHRLCLYR…	883	GRMZM2G117108_T02	ATGTCCCATGGTGTGCCCGCCCCCATGTTAGAAGAGTTGGCGAGGGAGGCAACACTCGCCGATGTGTCTATTCTTGTAGATGGGAATGACGCAGAGCTACATGTACATGGCAATGGCGCAGAGGTACATGATAATGGCACAGAGTTACATGGCAATGGTGCAGTGCTGAAAAGAGTTGAAATGCCCCAGGTTAGAGAGGTGTATGATTTGGGAGCGATTTCAGCCAAGGAGGTGCCGCTGCATGAGGGCAAGGAGGTGATACTTGTGGATGATAATGACAGCGGGCAGGAAGATGATGCAGAGGGTAAGGTGGATGAGAACACACCTCGTGTTGGGCTGAGATTCAAAACTTATGATGACGCTCTCAAGTACTATAAACAATATGCTGAGGATTCTGGG…	2652	GRMZM2G117108_T02	TATGGTCTGAATCTGCTGGTCCTCTTCTTCAGGGCTCAAGGTCAATCAGGTGTGGTCGCAGTTTTCCATTTTTAGGGTTCAGCTAAACTGGCCCCCCATGTCCCATGGTGTGCCCGCCCCCATGTTAGAAGAGTTGGCGAGGGAGGCAACACTCGCCGATGTGTCTATTCTTGTAGATGGGAATGACGCAGAGCTACATGTACATGGCAATGGCGCAGAGGTACATGATAATGGCACAGAGTTACATGGCAATGGTGCAGTGCTGAAAAGAGTTGAAATGCCCCAGGTTAGAGAGGTGTATGATTTGGGAGCGATTTCAGCCAAGGAGGTGCCGCTGCATGAGGGCAAGGAGGTGATACTTGTGGATGATAATGACAGCGGGCAGGAAGATGATGCAGA…	3120	GRMZM2G117108	5	182810298	182816922	TCACATGGCCCCAAGGGGATTCAGACCCATGACCCCCCATTCCCCCGTACAACCCAGGTCTAGCTAAAATTTAAAAACACATATGGTCCCAAGGGGATTCGAACCTATGACCCCTTAGGCAAATGCGAGCAGTAGCTACCGCTACACCACATGTGTGTTTATGTCTACATCTATGACATGAAAAACATCTATTACATCTCTCCCCAAGACCATCTGCTACCTTTGCACAATGCGTTGTAGTAGATAAGTATCATCGAAATTCTTGAATTATATTTTTGGATGGAGAGAGTAGTATTTAAAGAATAGCCTTGTATGCAATTTCTTTTGTTTGAATAATGTTTTTAACTTAAATTCCTTTTTTTGCATGTGTGGCATTTATTCTCCGTAATATATTTTCCA…	2000
GRMZM2G106653_P01	12	ZmFAR08.1	MEVEEPLPTSKNPRRARRRDLNALDPTLEESDGEDIGVPEVGMVFNNHTEVNRFYRRYARRVGFGVSVRRSSFSREGTCLYLELMCCKGGRPRYEPKFRKRASSTTNCPAKVRVKLWGDKLLHIELAILDHNHPVSPAMARFLNSYKQLSGPAKRRLRMGGPGTMPVEESSKMPMDKLGELEQLLFGESKHNSFVERGRLKLQPGDSEALRLFFTRMQAKNANFFNVIDLDDEGCTRNVFWADARSRAMCEYYSDVITLDTSYVASKYDMPLATFIGVNHHGQSVLMGCALLSDETAETYSWLLKSWIACMYGNLPKAIVTDYCRGIQSAVAEIIPGVRHRMCLFQIMRKAAERLGGLSEYRAINKAMHKAVYDSLTIDEFEEEWNTLITYSGLQSNDW…	805	GRMZM2G106653_T01	ATGGAGGTGGAGGAACCGCTCCCAACGTCCAAGAACCCCCGCCGTGCTCGGCGCCGGGACCTCAACGCACTGGATCCCACATTGGAGGAGTCCGACGGGGAGGATATTGGTGTTCCGGAAGTTGGTATGGTGTTCAATAATCACACAGAAGTCAACCGATTCTACCGCCGGTATGCCCGCCGTGTTGGCTTTGGTGTCTCAGTAAGGAGGTCTTCGTTCTCACGAGAAGGGACCTGCTTATATCTGGAGCTTATGTGCTGCAAAGGAGGGAGGCCACGTTATGAGCCGAAGTTTCGGAAAAGGGCTTCATCGACCACTAACTGCCCAGCCAAAGTACGAGTGAAGTTGTGGGGAGATAAATTGTTGCATATAGAGTTGGCGATCCTTGATCATAATCAC…	2418	GRMZM2G106653_T01	ATGGAGGTGGAGGAACCGCTCCCAACGTCCAAGAACCCCCGCCGTGCTCGGCGCCGGGACCTCAACGCACTGGATCCCACATTGGAGGAGTCCGACGGGGAGGATATTGGTGTTCCGGAAGTTGGTATGGTGTTCAATAATCACACAGAAGTCAACCGATTCTACCGCCGGTATGCCCGCCGTGTTGGCTTTGGTGTCTCAGTAAGGAGGTCTTCGTTCTCACGAGAAGGGACCTGCTTATATCTGGAGCTTATGTGCTGCAAAGGAGGGAGGCCACGTTATGAGCCGAAGTTTCGGAAAAGGGCTTCATCGACCACTAACTGCCCAGCCAAAGTACGAGTGAAGTTGTGGGGAGATAAATTGTTGCATATAGAGTTGGCGATCCTTGATCATAATCAC…	2418	GRMZM2G106653	5	182948968	182952939	AGGGATGGGGGTCTCTGATTTACTGCCTAGGGTACCCGCGCGTTCATAAAAAATATTTTGTGAAGAGTGGAGACAACCAATAAAAAATCTTGAGATCTTTTTGGTGGATAGTTTACGTGGGTATTGTTGTGAGCCATCGCAACGCACGGGTAACCGACTAGTCTCTACTATACTTAAAGCACTAGTTTCAACGGTCATCTTTTTACAAAAAAGTCCCTACATTTCTTCTAAATCAACTCAGCGTAAAATGTTAAAAAGCGGTGCAGGAGGTGGGTTATGTTAAAAAGTGATGCAGGAGTTGGGGTTTGAACCCACACCCTGATGGAAGAAGGGCGGAAGACACTGGATGAAGTTGTCTAACCAGTAAAACATCATGCTCACGTGTTTATAATATTGAAT…	2000
GRMZM2G406651_P01	13	ZmFAR09.1	MSTAGDPSRLSGESSPSSSTSSGSSSHSSGAADAAATNLALTAPTSALADDTDADAPTSPRVGTYFETEDDAYEFYKAYAARLGFVVRKSNKSKNSRHTVTRRLFVCSKQGFRQEPKKPQDETAGSGVASSPSLSLVPAPRCPDSRTGCLASLTIKLIPSANAFRVTDFVADHNHPLASSSPAVSLALLSPSSSHHSIVAVASLPDPRDGPRADMHFETEEDAYVFYNRYAEHVGFSVRRSYKKRKRGMIVSRIFVCSREGVSDRTKQEGGAIVIANGGAGSAGTPRPGPPPTRTGCQARMVIKITPCRTYRVAKFFPEHNHPLANPDSVHKLRSHKMRARAHELGAGEMHRRKQGKGVQLGDVGAALQYLEELQVENPSVYYAVGVGPDGKSAVNFFW…	855	GRMZM2G406651_T01	ATGTCCACCGCCGGGGACCCTTCCCGCCTCTCCGGCGAGTCCTCGCCGTCGTCCTCCACGTCCTCCGGCTCCTCCTCCCACTCCTCTGGCGCCGCCGATGCCGCCGCCACCAACCTCGCCCTGACAGCACCAACCTCCGCCCTCGCCGATGACACAGACGCCGATGCCCCCACCTCCCCGCGCGTGGGGACGTACTTTGAGACCGAGGACGACGCGTACGAGTTCTACAAGGCCTACGCGGCCCGTCTCGGCTTCGTCGTCCGCAAGTCCAACAAGTCCAAGAACTCACGGCACACCGTCACCCGCCGCCTCTTCGTCTGCTCCAAGCAGGGCTTCCGCCAGGAGCCCAAGAAGCCCCAGGACGAAACCGCAGGCTCCGGAGTCGCGTCCTCGCCCTCG…	2568	GRMZM2G406651_T01	ATGACCACGTCGCAGACCAACTCGGTCGCCCCCGTGGGCCGTGGGAGGCTCAACCGCACACATTAACCCACACCGGCCGCCTCCGCAGGCGATCCCTCCACCCCACAGGTTCCCTTCTCCCTCCTCCTTCCTCCAAACCCTGGCGCAAACCCTAATGTCCACCGCCGGGGACCCTTCCCGCCTCTCCGGCGAGTCCTCGCCGTCGTCCTCCACGTCCTCCGGCTCCTCCTCCCACTCCTCTGGCGCCGCCGATGCCGCCGCCACCAACCTCGCCCTGACAGCACCAACCTCCGCCCTCGCCGATGACACAGACGCCGATGCCCCCACCTCCCCGCGCGTGGGGACGTACTTTGAGACCGAGGACGACGCGTACGAGTTCTACAAGGCCTACGCGGCCCG…	3495	GRMZM2G406651	7	150316196	150320346	TTCAACATCATACTTAAAATATATTATATAGTAAACGATATCCCAATAAAAAGTAACAGTAATTATGAGCCCTATGAATATTTTTATCTTCCTTCGCACGTAGCTCTAATGATACTCAGATTAACCAGATTATCAGAAAAGCTGGTTAGAAAAAACTAACCAAACAAGCCCATAATTGCCTGTTCCACCTTCCATCAATCACAGTGCTAGCTGCAACATTTATGATTTAATGGCTACTTTAATCGCTTGTTCTAAATAGGAGTAACTAAATTTTAATCAGTTATTTTTAGTCACTTTGGTTTAACCCCATGATCTAAACAGGCCCGGAGTATAGTGTACCGGAGCAGGCTCGACGGCACCAACTCGACGATCGAAGCGAAGACGAAGCAAGTGGCTGAG…	2000
GRMZM2G406651_P02	14	ZmFAR09.2	MSTAGDPSRLSGESSPSSSTSSGSSSHSSGAADAAATNLALTAPTSALADDTDADAPTSPRVGTYFETEDDAYEFYKAYAARLGFVVRKSNKSKNSRHTVTRRLFVCSKQGFRQEPKKPQDETAGSGVASSPSLSLVPAPRCPDSRTGCLASLTIKLIPSANAFRVTDFVADHNHPLASSSPAVSLALLSPSSSHHSIVAVASLPDPRDGPRADMHFETEEDAYVFYNRYAEHVGFSVRRSYKKRKRGMIVSRIFVCSREGVSDRTKQEGGAIVIANGGAGSAGTPRPGPPPTRTGCQARMVIKITPCRTYRVAKFFPEHNHPLANPDSVHKLRSHKMRARAHELGAGEMHRRKQGKGVQLGDVGAALQYLEELQVENPSVYYAVGVGPDGKSAVNFFW…	855	GRMZM2G406651_T02	ATGTCCACCGCCGGGGACCCTTCCCGCCTCTCCGGCGAGTCCTCGCCGTCGTCCTCCACGTCCTCCGGCTCCTCCTCCCACTCCTCTGGCGCCGCCGATGCCGCCGCCACCAACCTCGCCCTGACAGCACCAACCTCCGCCCTCGCCGATGACACAGACGCCGATGCCCCCACCTCCCCGCGCGTGGGGACGTACTTTGAGACCGAGGACGACGCGTACGAGTTCTACAAGGCCTACGCGGCCCGTCTCGGCTTCGTCGTCCGCAAGTCCAACAAGTCCAAGAACTCACGGCACACCGTCACCCGCCGCCTCTTCGTCTGCTCCAAGCAGGGCTTCCGCCAGGAGCCCAAGAAGCCCCAGGACGAAACCGCAGGCTCCGGAGTCGCGTCCTCGCCCTCG…	2568	GRMZM2G406651_T02	ATGACCACGTCGCAGACCAACTCGGTCGCCCCCGTGGGCCGTGGGAGGCTCAACCGCACACATTAACCCACACCGGCCGCCTCCGCAGGCGATCCCTCCACCCCACAGGTTCCCTTCTCCCTCCTCCTTCCTCCAAACCCTGGCGCAAACCCTAATGTCCACCGCCGGGGACCCTTCCCGCCTCTCCGGCGAGTCCTCGCCGTCGTCCTCCACGTCCTCCGGCTCCTCCTCCCACTCCTCTGGCGCCGCCGATGCCGCCGCCACCAACCTCGCCCTGACAGCACCAACCTCCGCCCTCGCCGATGACACAGACGCCGATGCCCCCACCTCCCCGCGCGTGGGGACGTACTTTGAGACCGAGGACGACGCGTACGAGTTCTACAAGGCCTACGCGGCCCG…	2933	GRMZM2G406651	7	150316196	150320346	TTCAACATCATACTTAAAATATATTATATAGTAAACGATATCCCAATAAAAAGTAACAGTAATTATGAGCCCTATGAATATTTTTATCTTCCTTCGCACGTAGCTCTAATGATACTCAGATTAACCAGATTATCAGAAAAGCTGGTTAGAAAAAACTAACCAAACAAGCCCATAATTGCCTGTTCCACCTTCCATCAATCACAGTGCTAGCTGCAACATTTATGATTTAATGGCTACTTTAATCGCTTGTTCTAAATAGGAGTAACTAAATTTTAATCAGTTATTTTTAGTCACTTTGGTTTAACCCCATGATCTAAACAGGCCCGGAGTATAGTGTACCGGAGCAGGCTCGACGGCACCAACTCGACGATCGAAGCGAAGACGAAGCAAGTGGCTGAG…	2000
GRMZM2G048987_P01	15	ZmFAR10.1	MDCSQDPQEESHQRRENGEEAEKTADYGNALSRKEVTEELLGCVVHSEEEAYRLYCDYGHRIGFSVRKGKQSYFIGTKNIRTKDYYCSKEGLKYDEPVTEANFNRPDTRTNCKAMIRFRVDEKGRWTVIRFVPVHNHQLAKPGERHMLRSAKSLAVGKSGVIDPLASTEAHPINGFSDMTGDIVENSGYTIRECYNQVGMQSITVIEAGDSQSLVSYFKHKTNEEGMFYWDVQVDQEGRMTNFFYRDGKSRNDYGCFGDAIIFDTTYRTNKYNLICAPFVGVDHHWQNVVFGCAFLLDESVTSYAWVFKSFLESMGGRSPKSIFTDQDEAIMQAVKQVFPNTQHCFSYWHILKNAQSHLGSLNTSQAFQSMFTKCMQGSDSEEDFKESWTAMIQEYKLQ…	690	GRMZM2G048987_T01	ATGGACTGCAGTCAAGATCCCCAAGAAGAAAGCCATCAAAGAAGGGAGAATGGTGAAGAAGCAGAAAAGACGGCTGACTATGGAAATGCTTTGAGTCGTAAGGAGGTAACAGAAGAGCTTCTTGGTTGTGTGGTTCATAGTGAGGAAGAGGCGTACAGGTTGTACTGTGATTATGGGCATCGAATCGGTTTTAGCGTGCGGAAGGGCAAACAGTCTTACTTTATTGGTACCAAGAATATTCGAACAAAGGATTACTACTGCTCAAAGGAAGGGCTTAAATACGATGAGCCTGTTACAGAAGCAAATTTTAATCGACCAGACACAAGAACTAATTGCAAAGCAATGATCCGCTTTAGAGTTGACGAGAAGGGGCGGTGGACAGTTATACGCTTTGTTCCT…	2073	GRMZM2G048987_T01	GTGTGGAACCACTTCTGATGCTGTCTTTGTAAATATTGATGGAGCTAGCTGAGTAGAAATGGACTGCAGTCAAGATCCCCAAGAAGAAAGCCATCAAAGAAGGGAGAATGGTGAAGAAGCAGAAAAGACGGCTGACTATGGAAATGCTTTGAGTCGTAAGGAGGTAACAGAAGAGCTTCTTGGTTGTGTGGTTCATAGTGAGGAAGAGGCGTACAGGTTGTACTGTGATTATGGGCATCGAATCGGTTTTAGCGTGCGGAAGGGCAAACAGTCTTACTTTATTGGTACCAAGAATATTCGAACAAAGGATTACTACTGCTCAAAGGAAGGGCTTAAATACGATGAGCCTGTTACAGAAGCAAATTTTAATCGACCAGACACAAGAACTAATTGCAAAGC…	2493	GRMZM2G048987	7	152856122	152861721	TCGCTAGGATCTGCAAGGGAAAGGTTGATGCACAGTGTTGATTCGCGATCTGACGGCATGAATTAATTAAGCTAACGTGGCCGAACGGTGGACGAGCTTTGCGTCCACGTTTGTAATATAGAAATATATTCATTTGGCCCATTCTGACCCAACAACGCGCCTATTCGGCTGGCATCTTAGAACAATTGGCGCCTTTTTCCTTACCTATGCTTATGTCTTCTTCTTCTTCTTCAGTGATGCCTAGGGATGGTAACAGGAATTCCCTATCAGGCTTTGGCTTCTCATTCCCGTCCCCGCAACAAAAAAAAGTTCTCCGTAGGGATTCCCATTAGGAGGGCATTTCTTCCCTATCCTCGTTCCCCGCGGGGATAAATCCCCGTCGGGAATAAATCCCCGTCG…	2000
GRMZM2G048987_P02	16	ZmFAR10.2	MDCSQDPQEESHQRRENGEEAEKTADYGNALSRKEVTEELLGCVVHSEEEAYRLYCDYGHRIGFSVRKGKQSYFIGTKNIRTKDYYCSKEGLKYDEPVTEANFNRPDTRTNCKAMIRFRVDEKGRWTVIRFVPVHNHQLAKPGERHMLRSAKSLAVGKSGVIDPLASTEAHPINGFSDMTGDIVENSGYTIRECYNQVGMQSITVIEAGDSQSLVSYFKHKTNEEGMFYWDVQVDQEGRMTNFFYRDGKSRNDYGCFGDAIIFDTTYRTNKYNLICAPFVGVDHHWQNVVFGCAFLLDESVTSYAWVFKSFLESMGGRSPKSIFTDQDEAIMQAVKQVFPNTQHCFSYWHILKNAQSHLGSLNTSQAFQSMFTKCMQGSDSEEDFKESWTAMIQEYKLQ…	779	GRMZM2G048987_T02	ATGGACTGCAGTCAAGATCCCCAAGAAGAAAGCCATCAAAGAAGGGAGAATGGTGAAGAAGCAGAAAAGACGGCTGACTATGGAAATGCTTTGAGTCGTAAGGAGGTAACAGAAGAGCTTCTTGGTTGTGTGGTTCATAGTGAGGAAGAGGCGTACAGGTTGTACTGTGATTATGGGCATCGAATCGGTTTTAGCGTGCGGAAGGGCAAACAGTCTTACTTTATTGGTACCAAGAATATTCGAACAAAGGATTACTACTGCTCAAAGGAAGGGCTTAAATACGATGAGCCTGTTACAGAAGCAAATTTTAATCGACCAGACACAAGAACTAATTGCAAAGCAATGATCCGCTTTAGAGTTGACGAGAAGGGGCGGTGGACAGTTATACGCTTTGTTCCT…	2340	GRMZM2G048987_T02	ATGGACTGCAGTCAAGATCCCCAAGAAGAAAGCCATCAAAGAAGGGAGAATGGTGAAGAAGCAGAAAAGACGGCTGACTATGGAAATGCTTTGAGTCGTAAGGAGGTAACAGAAGAGCTTCTTGGTTGTGTGGTTCATAGTGAGGAAGAGGCGTACAGGTTGTACTGTGATTATGGGCATCGAATCGGTTTTAGCGTGCGGAAGGGCAAACAGTCTTACTTTATTGGTACCAAGAATATTCGAACAAAGGATTACTACTGCTCAAAGGAAGGGCTTAAATACGATGAGCCTGTTACAGAAGCAAATTTTAATCGACCAGACACAAGAACTAATTGCAAAGCAATGATCCGCTTTAGAGTTGACGAGAAGGGGCGGTGGACAGTTATACGCTTTGTTCCT…	3366	GRMZM2G048987	7	152856122	152861721	TCGCTAGGATCTGCAAGGGAAAGGTTGATGCACAGTGTTGATTCGCGATCTGACGGCATGAATTAATTAAGCTAACGTGGCCGAACGGTGGACGAGCTTTGCGTCCACGTTTGTAATATAGAAATATATTCATTTGGCCCATTCTGACCCAACAACGCGCCTATTCGGCTGGCATCTTAGAACAATTGGCGCCTTTTTCCTTACCTATGCTTATGTCTTCTTCTTCTTCTTCAGTGATGCCTAGGGATGGTAACAGGAATTCCCTATCAGGCTTTGGCTTCTCATTCCCGTCCCCGCAACAAAAAAAAGTTCTCCGTAGGGATTCCCATTAGGAGGGCATTTCTTCCCTATCCTCGTTCCCCGCGGGGATAAATCCCCGTCGGGAATAAATCCCCGTCG…	2000
GRMZM2G048987_P03	17	ZmFAR10.3	MDCSQDPQEESHQRRENGEEAEKTADYGNALSRKEVTEELLGCVVHSEEEAYRLYCDYGHRIGFSVRKGKQSYFIGTKNIRTKDYYCSKEGLKYDEPVTEANFNRPDTRTNCKAMIRFRVDEKGRWTVIRFVPVHNHQLAKPGERHMLRSAKSLAVGKSGVIDPLASTEAHPINGFSDMTGDIVENSGYTIRECYNQVGMQSITVIEAGDSQSLVSYFKHKTNEEGMFYWDVQVDQEGRMTNFFYRDGKSRNDYGCFGDAIIFDTTYRTNKYNLICAPFVGVDHHWQNVVFGCAFLLDESVTSYAWVFKSFLESMGGRSPKSIFTDQDEAIMQAVKQVFPNTQHCFSYWHILKNAQSHLGSLNTSQAFQSMFTKCMQGSDSEEDFKESWTAMIQEYKLQ…	779	GRMZM2G048987_T03	ATGGACTGCAGTCAAGATCCCCAAGAAGAAAGCCATCAAAGAAGGGAGAATGGTGAAGAAGCAGAAAAGACGGCTGACTATGGAAATGCTTTGAGTCGTAAGGAGGTAACAGAAGAGCTTCTTGGTTGTGTGGTTCATAGTGAGGAAGAGGCGTACAGGTTGTACTGTGATTATGGGCATCGAATCGGTTTTAGCGTGCGGAAGGGCAAACAGTCTTACTTTATTGGTACCAAGAATATTCGAACAAAGGATTACTACTGCTCAAAGGAAGGGCTTAAATACGATGAGCCTGTTACAGAAGCAAATTTTAATCGACCAGACACAAGAACTAATTGCAAAGCAATGATCCGCTTTAGAGTTGACGAGAAGGGGCGGTGGACAGTTATACGCTTTGTTCCT…	2340	GRMZM2G048987_T03	ATGGACTGCAGTCAAGATCCCCAAGAAGAAAGCCATCAAAGAAGGGAGAATGGTGAAGAAGCAGAAAAGACGGCTGACTATGGAAATGCTTTGAGTCGTAAGGAGGTAACAGAAGAGCTTCTTGGTTGTGTGGTTCATAGTGAGGAAGAGGCGTACAGGTTGTACTGTGATTATGGGCATCGAATCGGTTTTAGCGTGCGGAAGGGCAAACAGTCTTACTTTATTGGTACCAAGAATATTCGAACAAAGGATTACTACTGCTCAAAGGAAGGGCTTAAATACGATGAGCCTGTTACAGAAGCAAATTTTAATCGACCAGACACAAGAACTAATTGCAAAGCAATGATCCGCTTTAGAGTTGACGAGAAGGGGCGGTGGACAGTTATACGCTTTGTTCCT…	3134	GRMZM2G048987	7	152856122	152861721	TCGCTAGGATCTGCAAGGGAAAGGTTGATGCACAGTGTTGATTCGCGATCTGACGGCATGAATTAATTAAGCTAACGTGGCCGAACGGTGGACGAGCTTTGCGTCCACGTTTGTAATATAGAAATATATTCATTTGGCCCATTCTGACCCAACAACGCGCCTATTCGGCTGGCATCTTAGAACAATTGGCGCCTTTTTCCTTACCTATGCTTATGTCTTCTTCTTCTTCTTCAGTGATGCCTAGGGATGGTAACAGGAATTCCCTATCAGGCTTTGGCTTCTCATTCCCGTCCCCGCAACAAAAAAAAGTTCTCCGTAGGGATTCCCATTAGGAGGGCATTTCTTCCCTATCCTCGTTCCCCGCGGGGATAAATCCCCGTCGGGAATAAATCCCCGTCG…	2000
GRMZM2G129311_P01	18	ZmFAR11.1	MAGWLALDVAAEAEANENEATTEDANAQRIGLELSIVPRGLGFRVEGVQITTKKLGVQDTLMPSAPGEKDPQVIPRPATGPPLVQTLTPVNATGSPAIDPRLAQPSWPGHVVLLRPCAAWPPHLPVPLLLPHQNVDVAAADVNPAIDSCDEKMLPKVNMLFDGESDAYEFYNAYAEKVGFFVRRSTLWTTSKNIITRRTFVCSREGFREKKKGAKEAKCPRPETRIGCPASLTIRLTANGKYRLTEFVPNHNHQLATASTVHMLKTKKIRRKARAARENLADDTVSTPEFENEDEAYEFYSMYAGKIGFSVRRASMTVNNENVITRRMFVCSKEGFREKKRGAKRVKKPRPETRTGCPACMVIRLGTNEKYQVTEFVTCHNHQLGAAAASDLVMASGST…	956	GRMZM2G129311_T01	ATGGCGGGGTGGCTGGCGCTAGACGTCGCCGCGGAGGCAGAGGCGAACGAGAATGAGGCCACGACGGAGGATGCGAATGCGCAGAGGATCGGTCTCGAACTCTCAATTGTCCCTAGAGGGCTTGGGTTCCGTGTTGAGGGCGTTCAAATTACTACCAAAAAATTGGGAGTTCAAGACACCCTGATGCCATCAGCACCTGGGGAGAAGGATCCACAAGTTATACCGAGGCCTGCGACGGGGCCTCCTCTGGTGCAGACTCTCACGCCTGTCAATGCAACAGGAAGTCCTGCCATAGACCCGAGGCTGGCGCAGCCGTCTTGGCCTGGCCATGTAGTACTCCTGCGCCCTTGTGCAGCTTGGCCTCCTCATTTGCCAGTCCCGTTGCTGCTTCCGCACCAA…	2871	GRMZM2G129311_T01	ATGGCGGGGTGGCTGGCGCTAGACGTCGCCGCGGAGGCAGAGGCGAACGAGAATGAGGCCACGACGGAGGATGCGAATGCGCAGAGGATCGGTCTCGAACTCTCAATTGTCCCTAGAGGGCTTGGGTTCCGTGTTGAGGGCGTTCAAATTACTACCAAAAAATTGGGAGTTCAAGACACCCTGATGCCATCAGCACCTGGGGAGAAGGATCCACAAGTTATACCGAGGCCTGCGACGGGGCCTCCTCTGGTGCAGACTCTCACGCCTGTCAATGCAACAGGAAGTCCTGCCATAGACCCGAGGCTGGCGCAGCCGTCTTGGCCTGGCCATGTAGTACTCCTGCGCCCTTGTGCAGCTTGGCCTCCTCATTTGCCAGTCCCGTTGCTGCTTCCGCACCAA…	3674	GRMZM2G129311	7	157771968	157777346	ACAACATTCATCTTTGGATCATAGATATTCTCATTAACTCCAACTACAAACATTGGAGCATCTGCATATGTTACCACTTTTGTAGCACCACTCTGTAAACAAACAACAAAAACATCAACATGTTTTCGATACGAAAAGATATGCAGTTAGTTAATTAGATAACATTGTTACAAATTAGTCTGGTACACACAAACCTTTAAGTGTGTTAATGCTTTATCAGTCATTGTAAAGACATCAGAAGATTCAACAACATATTCAGCCCCAAAGTGAATTGATATACTGCAAGAGCAAACAGAGACAAGAAGGCAGTTAAAATTAGTTCCCACAACCACGCAAAGCTCGATAAAAATGAGGTAATGAAACCTACTGCGAAAGCTTGGGCATCATCCTTAGTTCCAC…	2000
GRMZM2G129311_P02	19	ZmFAR11.2	MPSAPGEKDPQVIPRPATGPPLVQTLTPVNATGSPAIDPRLAQPSWPGHVVLLRPCAAWPPHLPVPLLLPHQNVDALEDVAAADVNPAIDSCDEKMLPKVNMLFDGESDAYEFYNAYAEKVGFFVRRSTLWTTSKNIITRRTFVCSREGFREKKKGAKEAKCPRPETRIGCPASLTIRLTANGKYRLTEFVPNHNHQLATASTVHMLKTKKIRRKARAARENLADDTVSTPEFENEDEAYEFYSMYAGKIGFSVRRASMTVNNENVITRRMFVCSKEGFREKKRGAKRVKKPRPETRTGCPACMVIRLGTNEKYQVTEFVTCHNHQLGAAAASDLVMASGSTENDQDDGFDQADRSPDDSVHKQNLIYGSTTLSSLEGRSCKRYKYTKTPRSGDVGATL…	899	GRMZM2G129311_T02	ATGCCATCAGCACCTGGGGAGAAGGATCCACAAGTTATACCGAGGCCTGCGACGGGGCCTCCTCTGGTGCAGACTCTCACGCCTGTCAATGCAACAGGAAGTCCTGCCATAGACCCGAGGCTGGCGCAGCCGTCTTGGCCTGGCCATGTAGTACTCCTGCGCCCTTGTGCAGCTTGGCCTCCTCATTTGCCAGTCCCGTTGCTGCTTCCGCACCAAAATGTGGATGCTCTGGAGGATGTGGCTGCAGCAGATGTTAACCCTGCGATCGATAGCTGTGACGAGAAGATGTTGCCCAAGGTGAATATGTTGTTCGATGGTGAAAGCGATGCGTATGAGTTCTACAATGCATATGCGGAAAAGGTGGGCTTCTTTGTCCGAAGGTCAACGCTCTGGACGACG…	2700	GRMZM2G129311_T02	CGCCGTCCTCTTCTTTGCCCGTCGGCCGGCGCCGCCGCAGAAACCAGCCACCCGAGTGAGCTCTTCCAGTCGTACTTGTATTAATCGGCCCACTGTCCGGCTACTGGTATTAGGTTCGTGTTGACTGGAGATTCAGAATTCATTTTTGTTTGTTGTGACAGCTGGTGATCCATCTCGTGCTCAAGGATCGGTCTCGAACTCTCAATTGTCCCTAGAGGGCTTGGGTTCCGTGTTGAGGGCGTTCAAATTACTACCAAAAAATTGGGAGTTCAAGACACCCTGATGCCATCAGCACCTGGGGAGAAGGATCCACAAGTTATACCGAGGCCTGCGACGGGGCCTCCTCTGGTGCAGACTCTCACGCCTGTCAATGCAACAGGAAGTCCTGCCATAGACCCG…	3319	GRMZM2G129311	7	157771968	157777346	CAGAGATCGGCGGCCGGCCCTGGTCAAGGGCCACGAGAACGGCTAACAGTAACGAGACGCGCGCACGCACACAGAGGAACGATAATCTAAACGGAAAGAGGTGGCGGCTCTTCGTCCCCCGGCGGCCCGGCCTAGGATGCAGGACGAGGATTGCCGTTGCGTGAGTGACTCCCACACGAATCGAAGAAGAGACGGACTTATGATGCAGGGCGGAGGAGGGGAGGGTCTTGGCCAGCTGCAACCCCGAGACAGAGAGAGATCCAGCTCCGGCTGCTCCTTCCTCACCCCTCACGCTCACATAAAGAGGTGGGGGTAGGGGGGAGTCCACTGACCTGGGGGAGGAGGTCATGAGGAGAGCGGTTGCTTGCCGTGCCCTGCAACTCAGGCTTCGATGGCGGG…	2000
GRMZM2G114461_P01	20	ZmFAR12.1	MMHMLVAPDRGGGELQPYVAPPAEQELELLRDNADDGLEGHVRCLRCGISGNATPHMRRGPDGPRTLCNACGIAYRKGKMRRMIEAEPPIDEAALAKLVPEVGMEFVSEEKAYEFYNKYAGHVGFSVRKSTSHKSSENITKVRTFVCSREGYNRDKKSLEAKKPRLDTRIGCPARLIIKVTPECKYRVTDFKADHNHQLAPPSTMHMLRSQRILTELQPGEAELSDDSVVTPTTKATGDLVVRQVSFLRSLSLLPADYKNYLRSKRMKAMQPGDGGAILKYLQTMQMDNPSFFYTMQIDEDDKLTNFFWADQKSRDDFNYFGDVLCLDTTYKINGYGRPLALFLGVNHHKQTIIFGAAMLYDESFDSYKWLFDSFKIAMHGKQPAVALIDQSIPLSSAM…	704	GRMZM2G114461_T01	ATGATGCACATGCTGGTAGCCCCGGATAGGGGCGGAGGGGAGCTGCAGCCGTACGTAGCGCCGCCCGCAGAGCAGGAGCTGGAGCTCCTCCGCGACAACGCCGATGACGGCCTCGAGGGCCACGTGCGATGCCTAAGGTGTGGAATATCCGGCAATGCGACGCCCCATATGCGCCGGGGGCCTGATGGCCCAAGAACTCTTTGCAATGCGTGTGGCATTGCTTACAGGAAGGGGAAAATGAGAAGAATGATAGAAGCTGAACCACCCATAGATGAGGCTGCTCTTGCAAAGCTGGTTCCAGAGGTAGGCATGGAATTTGTGAGTGAGGAAAAGGCATACGAATTCTACAACAAATATGCTGGGCATGTTGGCTTTAGCGTTAGGAAAAGTACATCACAT…	2115	GRMZM2G114461_T01	CAGCGGATCCCGCTGACTCCTCCGCTCCTACTCCCCTGCGTCTGCTCGTCGTCTCCCCGCTCCAAACCCTAACTCGAAGCCGGAACGACCGACAAAATTCGGGAAAATCGCTCACAATTTCGCTCCAAACTACTTCCTGGACGGTGATGCGATGATGCACATGCTGGTAGCCCCGGATAGGGGCGGAGGGGAGCTGCAGCCGTACGTAGCGCCGCCCGCAGAGCAGGAGCTGGAGCTCCTCCGCGACAACGCCGATGACGGCCTCGAGGGCCACGTGCGATGCCTAAGGTGTGGAATATCCGGCAATGCGACGCCCCATATGCGCCGGGGGCCTGATGGCCCAAGAACTCTTTGCAATGCGTGTGGCATTGCTTACAGGAAGGGGAAAATGAGAAGAAT…	2456	GRMZM2G114461	7	165506191	165510340	CTTCAAAATCATCAAGAAGGGCATTTATTTAAAAGCCATTCAATTTCAAACTGGGCTCTCCTTCACTCTTATCCAGGGGCAAATGCACCCCCTCACAGATATAAAAATAGTGACTTTGGCTAGCCACTGATTCAACATAGTTTCTCAACAATACGTGTAACGGTGTAAGGCCACAAAGTTAAGATGTTAAGGCATGGTAAGGCGAGACATGGCAATCACCCCCTTCCCATCAGGCCATCACCTAGGAATGGTGCTAACTGCTAATGCCACTAGTGCCACAACAGAAAGGAAAGAGCAAAATAAATGGAATGGTTCTAATGCAAAAGAGATCAGAGGGCTCAATATTTTTTTTAATGTTGTTAGCTGGTGCAGTCCACCCAAAATGCATTAGCGAAGGAT…	2000
GRMZM2G114461_P02	21	ZmFAR12.2	MRRGPDGPRTLCNACGIAYRKGKMRRMIEAEPPIDEAALAKLVPEVGMEFVSEEKAYEFYNKYAGHVGFSVRKSTSHKSSENITKVRTFVCSREGYNRDKKSLEAKKPRLDTRIGCPARLIIKVTPECKYRVTDFKADHNHQLAPPSTMHMLRSQRILTELQPGEAELSDDSVVTPTTKATGDLVVRQVSFLRSLSLLPADYKNYLRSKRMKAMQPGDGGAILKYLQTMQMDNPSFFYTMQIDEDDKLTNFFWADQKSRDDFNYFGDVLCLDTTYKINGYGRPLALFLGVNHHKQTIIFGAAMLYDESFDSYKWLFDSFKIAMHGKQPAVALIDQSIPLSSAMAAAWPSTTQRICAWHVYQNSLKHLNHVFQGSKTFAKDFGKCVFGYEDEDEFVFSWR…	648	GRMZM2G114461_T02	ATGCGCCGGGGGCCTGATGGCCCAAGAACTCTTTGCAATGCGTGTGGCATTGCTTACAGGAAGGGGAAAATGAGAAGAATGATAGAAGCTGAACCACCCATAGATGAGGCTGCTCTTGCAAAGCTGGTTCCAGAGGTAGGCATGGAATTTGTGAGTGAGGAAAAGGCATACGAATTCTACAACAAATATGCTGGGCATGTTGGCTTTAGCGTTAGGAAAAGTACATCACATAAATCTTCAGAAAATATTACCAAAGTTAGAACTTTTGTGTGCTCAAGAGAAGGCTACAACAGGGATAAAAAATCACTGGAAGCCAAGAAGCCAAGATTGGATACACGAATCGGTTGCCCAGCGAGATTGATTATAAAAGTCACACCAGAGTGCAAGTATAGAGTAACT…	1947	GRMZM2G114461_T02	CAGCGGATCCCGCTGACTCCTCCGCTCCTACTCCCCTGCGTCTGCTCGTCGTCTCCCCGCTCCAAACCCTAACTCGAAGCCGGAACGACCGACAAAATTCGGGAAAATCGCTCACAATTTCGCTCCAAACTACTTCCTGGACGGTGATGCGATGATGCACATGCTGGTAGCCCCGGATAGGGGCGGAGGGGAGCTGCAGCCGTACGTAGCGCCGCCCGCAGAGCAGGAGCTGGAGCTCCTCCGCGACAACGCCGATGACGGCCTCGAGGGCCACGTGCGATGCCTAAGGTGTGGAATATCCCGGCAATGCGACGCCCCATATGCGCCGGGGGCCTGATGGCCCAAGAACTCTTTGCAATGCGTGTGGCATTGCTTACAGGAAGGGGAAAATGAGAAGAA…	2457	GRMZM2G114461	7	165506191	165510340	CCTCCACTGGGGACCGTGCTGTCCATTTAACGAGATCACAGCCTCCAATGATATATCTCAGATGATAGACAATATTGCATCACAAGGATCAAGGTTAGCACAACCAATAATAATAATAATAATGTAGTGGCAAATAAAACATCATGATTTATCAGGATACTATTTTCGCTGGCATGAATTCCTTCTCCTTGGTCAAGGAACCCTCAAGCATCTCAGAACTTTGCAAACTCATTTTATCACTACTTAACCAAATATACAACAAACAATTTTATAACTATTTCAGCTTCATTTTGATTAAGGAGTATTTCTTGAACATAGGTTAGGCTTGTATCACAGACACTGGTCAAGTTGTTAGGTGCACCACAAGCCAGAAAGGTTGTAAACACTACTTGATTAAAG…	2000
GRMZM2G148940_P01	22	ZmFAR13.1	MEYSSSEDEGLVGDFIDAEDNTFTKNIDQGTGVMASQIHGDDPSVGSMPPVIGNELLMAADVLAKNDEPRMGMEFDSDAAARAFYNAYALCFGFGIRVARSRSERRKGVEVLVMKRFVCLKEGHHRKKKPVEPSNKKKRKRLSIRDGCPAMMEVVRRGPDRWVITKLVLEHTHVIVSADRAREVQLHRLSGKFQEHENQLQEVRRNVFGDTNAQGLFNYFKKMQSDNSSFFFSIQVDSKNYVSNAVWVDARARMAYTYFGDAVYFDTTCSQNENMLPFAAFTGVNHHGDTVVFGCALILDRTESSYGWIFETWLTAMDSRLPFSLTTDEGKGIAAAVAKVFPQCFHRLCRWRILSRCKKRLTDARTRFPGLHEELKRCVNGCDTAVIFDMLWGSILDKY…	673	GRMZM2G148940_T01	ATGGAGTATTCCTCAAGTGAAGACGAGGGATTGGTTGGAGATTTTATCGACGCTGAGGATAATACGTTCACTAAGAATATTGACCAAGGAACTGGCGTGATGGCTTCCCAGATCCATGGTGATGATCCCTCGGTGGGATCCATGCCACCTGTTATTGGAAATGAGCTGCTGATGGCAGCTGATGTATTGGCCAAAAATGACGAACCTCGTATGGGCATGGAATTCGACTCTGATGCTGCTGCTCGCGCATTCTACAATGCATATGCTTTATGCTTTGGGTTTGGGATTCGTGTTGCCCGATCCCGTAGTGAGCGAAGAAAGGGCGTCGAGGTGCTCGTCATGAAGCGTTTTGTGTGCTTGAAAGAGGGACATCACAGGAAGAAGAAGCCAGTTGAGCCT…	2022	GRMZM2G148940_T01	CGCTCCCCGTTGACTGCCACTCTCCTTGCGTGCACTATCGTCCCGGCGACGACTCCGCTGCCGTCGCCGCCTACGCCAGGTTCCGAAGTCTTCGTGAGCCCCTTCTCCTACAACGAGCACTCACACCAATCACCAGTGATTTATTGCGCATGAGGACTGCATCTCCCCTTGAAATTTGAGGCTTTGGAAAACTGCTGAATGGAGTATTCCTCAAGTGAAGACGAGGGATTGGTTGGAGATTTTATCGACGCTGAGGATAATACGTTCACTAAGAATATTGACCAAGGAACTGGCGTGATGGCTTCCCAGATCCATGGTGATGATCCCTCGGTGGGATCCATGCCACCTGTTATTGGAAATGAGCTGCTGATGGCAGCTGATGTATTGGCCAAAAATGAC…	2393	GRMZM2G148940	9	87667166	87669926	TCCGAGCCCTAGGGTCGGGCGGAGCGGAGTTCGCCGTCTTCCGGGTCTTAGCCCGAGTCCGAGCCCTGGGGTCGGGCGGAGCGGAGTTCGCCGTCTTCCGGGTCTTAGCCCGAGTCCGAGCCCTGGGGTCGGGCGGAGCGGAGTTCGCCGTCTTCCGGGTCTTAGCCCGAGTCCGAGCCCTGGGGTCGGGCGGAGCGGAGTTCGCCGTGGCGCCTTTGGCAAGGCCTGACTGCCTGTCAGACTCACTCTGTCGAGTGGCACTGCAGTCGGAGTGGCGCAGGCGGCGCTGTCCTTCTGTCAGACTGGCCAGTGGAGCGGTGGAGTGACGGCGGTCACCTCGGCTCTGCCGGGGGCGCGTGTCAGGATAGAGGTGTCAGGCCACCTTTGCGTTAAATGCCC…	2000
GRMZM2G104268_P01	23	ZmFAR14.1	MAPLQTSASTTSVTASSGVTAESLLDLSPDTVFSIHADAEDGSPRKGGGSLAPPFPSPCTLRTTLLRYADLLNPPKKAALLALASHASDPAEAERLRFLASPAGKGGRFASSIMWEPVALGLLFYRTVLFMPVWHTMLEVVDGSLQNSCNMCISFWAFTNRKDPPRSLFNMDEGLAPFRGFLQERLALKQSGAELGTSILFFGCRNRNMDYIYEDELQTFLEAGALSELIVAFSQEGPTKEYVQHKMVEKSDLKILEPMEEEEYSSETSNEEDGEKEGNAAESDVFRPVDVDPACLPRVGMIFDSEEDAFQFYVTYGCHAGFGITRRSNNTFDGFRYRSTFICSKGGQSRLRSGVTKPARKRGVKTGCKAKMIVKDAHFQNRWEVIVLELEHNHPLDPN…	1023	GRMZM2G104268_T01	ATGGCTCCTCTTCAGACTTCAGCTTCTACTACCTCTGTCACTGCTTCATCAGGTGTGACAGCTGAAAGCCTACTTGACCTTTCTCCAGATACAGTCTTCTCCATCCATGCAGATGCAGAAGATGGGTCTCCTCGTAAAGGAGGAGGTTCCTTGGCCCCACCTTTCCCATCTCCATGTACTTTGCGGACTACGCTTCTACGATATGCTGATCTACTCAATCCACCGAAGAAGGCTGCTTTGCTTGCTTTAGCTTCTCATGCATCTGATCCAGCTGAAGCTGAACGACTTAGGTTCTTGGCCTCTCCTGCTGGAAAGGGGGGAAGGTTTGCCTCCTCAATCATGTGGGAGCCTGTGGCGCTGGGTCTGCTCTTTTATCGAACTGTCCTGTTCATGCCGGTG…	3072	GRMZM2G104268_T01	ATGGCTCCTCTTCAGACTTCAGCTTCTACTACCTCTGTCACTGCTTCATCAGGTGTGACAGCTGAAAGCCTACTTGACCTTTCTCCAGATACAGTCTTCTCCATCCATGCAGATGCAGAAGATGGGTCTCCTCGTAAAGGAGGAGGTTCCTTGGCCCCACCTTTCCCATCTCCATGTACTTTGCGGACTACGCTTCTACGATATGCTGATCTACTCAATCCACCGAAGAAGGCTGCTTTGCTTGCTTTAGCTTCTCATGCATCTGATCCAGCTGAAGCTGAACGACTTAGGTTCTTGGCCTCTCCTGCTGGAAAGGGGGGAAGGTTTGCCTCCTCAATCATGTGGGAGCCTGTGGCGCTGGGTCTGCTCTTTTATCGAACTGTCCTGTTCATGCCGGTG…	3216	GRMZM2G104268	10	145543618	145550014	CATTGTGTCAGTCCAGTTATTCCATATCGAACACTGTCTTTGTTCTGCCTGGCACATTGATCATGAACATCGTATAGAAATGCTGCTAGAATCTTGCTTCCAATGCCAACAAATGATGTAGTCAAGACTGAGGCTCGGTGTATAACTCTCATACTTGAGTTAAAGAGGATTCTCACACCATCACACTCAGGAATATGTTTTGTGGGTTCACCATACTTGTATTGAACAAGACCTCCATATGGACCAATCATCAACAGCACTTCAGGCCAGTAGATGGATACACTATCGAGTCTACTCCAAACTATTTGCTCTAATGACAACACCGAGTCTGCAAGAAGCTTGCCAATGATTGCAACTGCCATCTTCTGTCCAAGTCCAATCTCCAGCTCTTCACCGGTC…	2000
GRMZM2G104268_P02	24	ZmFAR14.2	MAPLQTSASTTSVTASSGVTAESLLDLSPDTVFSIHADAEDGSPRKGGGSLAPPFPSPCTLRTTLLRYADLLNPPKKAALLALASHASDPAEAERLRFLASPAGKGGRFASSIMWEPVALGLLFYRTVLFMPVWHTMLEVVDGSLQNSCNMCISFWAFTNRKDPPRSLFNMDEGLAPFRGFLQERLALKQSGAELGTSILFFGCRNRNMDYIYEDELQTFLEAGALSELIVAFSQEGPTKEYVQHKMVEKSDLKILEPMEEEEYSSETSNEEDGEKEGNAAESDVFRPVDVDPACLPRVGMIFDSEEDAFQFYVTYGCHAGFGITRRSNNTFDGFRYRSTFICSKGGQSRLRSGVTKPARKRGVKTGCKAKMIVKDAHFQNRWEVIVLELEHNHPLDPN…	1047	GRMZM2G104268_T02	ATGGCTCCTCTTCAGACTTCAGCTTCTACTACCTCTGTCACTGCTTCATCAGGTGTGACAGCTGAAAGCCTACTTGACCTTTCTCCAGATACAGTCTTCTCCATCCATGCAGATGCAGAAGATGGGTCTCCTCGTAAAGGAGGAGGTTCCTTGGCCCCACCTTTCCCATCTCCATGTACTTTGCGGACTACGCTTCTACGATATGCTGATCTACTCAATCCACCGAAGAAGGCTGCTTTGCTTGCTTTAGCTTCTCATGCATCTGATCCAGCTGAAGCTGAACGACTTAGGTTCTTGGCCTCTCCTGCTGGAAAGGGGGGAAGGTTTGCCTCCTCAATCATGTGGGAGCCTGTGGCGCTGGGTCTGCTCTTTTATCGAACTGTCCTGTTCATGCCGGTG…	3144	GRMZM2G104268_T02	ATGGCTCCTCTTCAGACTTCAGCTTCTACTACCTCTGTCACTGCTTCATCAGGTGTGACAGCTGAAAGCCTACTTGACCTTTCTCCAGATACAGTCTTCTCCATCCATGCAGATGCAGAAGATGGGTCTCCTCGTAAAGGAGGAGGTTCCTTGGCCCCACCTTTCCCATCTCCATGTACTTTGCGGACTACGCTTCTACGATATGCTGATCTACTCAATCCACCGAAGAAGGCTGCTTTGCTTGCTTTAGCTTCTCATGCATCTGATCCAGCTGAAGCTGAACGACTTAGGTTCTTGGCCTCTCCTGCTGGAAAGGGGGGAAGGTTTGCCTCCTCAATCATGTGGGAGCCTGTGGCGCTGGGTCTGCTCTTTTATCGAACTGTCCTGTTCATGCCGGTG…	3288	GRMZM2G104268	10	145543618	145550014	CATTGTGTCAGTCCAGTTATTCCATATCGAACACTGTCTTTGTTCTGCCTGGCACATTGATCATGAACATCGTATAGAAATGCTGCTAGAATCTTGCTTCCAATGCCAACAAATGATGTAGTCAAGACTGAGGCTCGGTGTATAACTCTCATACTTGAGTTAAAGAGGATTCTCACACCATCACACTCAGGAATATGTTTTGTGGGTTCACCATACTTGTATTGAACAAGACCTCCATATGGACCAATCATCAACAGCACTTCAGGCCAGTAGATGGATACACTATCGAGTCTACTCCAAACTATTTGCTCTAATGACAACACCGAGTCTGCAAGAAGCTTGCCAATGATTGCAACTGCCATCTTCTGTCCAAGTCCAATCTCCAGCTCTTCACCGGTC…	2000

## Sheet: protein
ID	Number of amino acids	Molecular weight	Theoretical pI	The instability index (II)	Grand average of hydropathicity (GRAVY)	Plant-mPLoc
ZmFAR01.1	666	73270	7.83	53.37	-0.477	Nucleus
ZmFAR02.1	1198	135289	6.37	53.39	-0.653	Chloroplast. Mitochondrion. Nucleus
ZmFAR02.2	1202	135849	6.14	52.73	-0.664	Chloroplast. Mitochondrion
ZmFAR03.1	863	97236.7	5.76	41.19	-0.356	Nucleus
ZmFAR03.2	870	98009.6	5.81	40.98	-0.365	Chloroplast. Nucleus.
ZmFAR04.1	817	94179.4	5.31	47.83	-0.665	Nucleus
ZmFAR04.2	772	89257.2	5.46	47.97	-0.614	Nucleus
ZmFAR05.1	850	96714.6	6.77	51.62	-0.427	Chloroplast. Nucleus.
ZmFAR06.1	687	78325.3	6.26	39.68	-0.572	Nucleus
ZmFAR07.1	879	100617	6.08	45.16	-0.573	Chloroplast
ZmFAR07.2	883	101136	6.08	44.66	-0.567	Chloroplast
ZmFAR08.1	805	91773.4	8.99	55.3	-0.383	Chloroplast
ZmFAR09.1	855	94584.7	7.02	52.79	-0.378	Chloroplast
ZmFAR09.2	855	94584.7	7.02	52.79	-0.378	Chloroplast
ZmFAR10.1	690	79156.9	6.29	40.42	-0.634	Chloroplast. Nucleus. Vacuole
ZmFAR10.2	779	88945.9	6.47	44.02	-0.631	Cell wall
ZmFAR10.3	779	88945.9	6.47	44.02	-0.631	Cell wall
ZmFAR11.1	956	107796	6.15	42.91	-0.431	Cell wall. Nucleus
ZmFAR11.2	899	101760	6.35	44.47	-0.455	Cell wall. Nucleus
ZmFAR12.1	704	80279.7	7.79	48.05	-0.434	Nucleus
ZmFAR12.2	648	74258.9	8.5	47.52	-0.435	Nucleus
ZmFAR13.1	673	76583.5	8.89	43.22	-0.329	Chloroplast. Nucleus
ZmFAR14.1	1023	115821	6.03	48.53	-0.408	Nucleus
ZmFAR14.2	1047	118414	5.94	48.49	-0.414	Nucleus

## Sheet: CDD
Query	Hit type	PSSM-ID	From	To	E-Value	Bitscore	Accession	Short name	Incomplete	Superfamily	length
Q#1 - >GRMZM2G001663_P01	specific	335217	67	160	1.16e-31	117.822	pfam03101	FAR1 superfamily	-	cl44389	94
Q#1 - >GRMZM2G001663_P01	specific	335217	205	296	2.03e-31	117.437	pfam03101	FAR1 superfamily	-	cl44389	92
Q#1 - >GRMZM2G001663_P01	superfamily	178645	334	396	2.07e-05	47.6816	cl31971	FHY3 superfamily	N	-	63
Q#2 - >GRMZM2G034868_P01	superfamily	178645	21	630	9.4e-87	293.439	cl31971	FHY3 superfamily	C	-	610
Q#3 - >GRMZM2G034868_P02	superfamily	178645	53	662	1.92e-87	294.209	cl31971	FHY3 superfamily	C	-	610
Q#4 - >GRMZM2G043250_P01	superfamily	178645	87	632	1.48e-81	276.105	cl31971	FHY3 superfamily	C	-	546
Q#5 - >GRMZM2G048987_P01	superfamily	178645	38	596	1.02e-101	330.033	cl31971	FHY3 superfamily	C	-	559
Q#6 - >GRMZM2G048987_P02	superfamily	178645	38	596	4.72e-101	331.189	cl31971	FHY3 superfamily	C	-	559
Q#7 - >GRMZM2G048987_P03	superfamily	178645	38	596	4.72e-101	331.189	cl31971	FHY3 superfamily	C	-	559
Q#8 - >GRMZM2G104268_P01	superfamily	178645	297	853	9.22e-113	368.553	cl31971	FHY3 superfamily	C	-	557
Q#9 - >GRMZM2G104268_P02	superfamily	178645	297	853	1.49e-112	368.553	cl31971	FHY3 superfamily	C	-	557
Q#10 - >GRMZM2G106653_P01	superfamily	178645	20	675	3.39e-149	458.304	cl31971	FHY3 superfamily	-	-	656
Q#11 - >GRMZM2G114461_P01	superfamily	178645	97	658	1.66e-99	324.64	cl31971	FHY3 superfamily	C	-	562
Q#12 - >GRMZM2G114461_P02	superfamily	178645	41	602	3.75e-100	324.64	cl31971	FHY3 superfamily	C	-	562
Q#13 - >GRMZM2G117108_P01	superfamily	178645	72	875	3.42e-112	363.545	cl31971	FHY3 superfamily	-	-	804
Q#14 - >GRMZM2G117108_P02	superfamily	178645	77	879	1.32e-111	362.004	cl31971	FHY3 superfamily	-	-	803
Q#15 - >GRMZM2G129311_P01	superfamily	178645	277	897	3.73e-104	343.9	cl31971	FHY3 superfamily	C	-	621
Q#15 - >GRMZM2G129311_P01	specific	335217	169	257	1.09e-31	118.593	pfam03101	FAR1 superfamily	-	cl44389	89
Q#16 - >GRMZM2G129311_P02	superfamily	178645	220	840	1.13e-104	343.9	cl31971	FHY3 superfamily	C	-	621
Q#16 - >GRMZM2G129311_P02	specific	335217	112	200	1.52e-31	118.208	pfam03101	FAR1 superfamily	-	cl44389	89
Q#17 - >GRMZM2G148940_P01	superfamily	178645	7	652	1.44e-115	366.242	cl31971	FHY3 superfamily	C	-	646
Q#18 - >GRMZM2G155980_P01	superfamily	178645	108	859	6.37e-123	391.28	cl31971	FHY3 superfamily	-	-	752
Q#19 - >GRMZM2G155980_P02	superfamily	178645	108	819	4.55e-124	394.746	cl31971	FHY3 superfamily	-	-	712
Q#20 - >GRMZM2G302323_P01	superfamily	178645	190	799	5.43e-120	383.19	cl31971	FHY3 superfamily	-	-	610
Q#20 - >GRMZM2G302323_P01	superfamily	335217	86	176	6.22e-29	110.504	cl44389	FAR1 superfamily	-	-	91
Q#21 - >GRMZM2G406651_P01	superfamily	178645	211	794	4.72e-89	300.758	cl31971	FHY3 superfamily	C	-	584
Q#21 - >GRMZM2G406651_P01	superfamily	335217	74	177	7.61e-22	90.4732	cl44389	FAR1 superfamily	-	-	104
Q#22 - >GRMZM2G406651_P02	superfamily	178645	211	794	4.72e-89	300.758	cl31971	FHY3 superfamily	C	-	584
Q#22 - >GRMZM2G406651_P02	superfamily	335217	74	177	7.61e-22	90.4732	cl44389	FAR1 superfamily	-	-	104
Q#23 - >GRMZM2G463730_P01	superfamily	178645	421	1168	5.28e-102	343.13	cl31971	FHY3 superfamily	-	-	748
Q#23 - >GRMZM2G463730_P01	superfamily	335217	126	170	0.000607965	40.0121	cl44389	FAR1 superfamily	C	-	45
Q#23 - >GRMZM2G463730_P01	superfamily	335217	73	100	0.00622492	36.9305	cl44389	FAR1 superfamily	N	-	28
Q#24 - >GRMZM2G463730_P02	superfamily	178645	421	1133	2.96e-101	340.819	cl31971	FHY3 superfamily	-	-	713
Q#24 - >GRMZM2G463730_P02	superfamily	335217	126	170	0.000506679	40.0121	cl44389	FAR1 superfamily	C	-	45
Q#24 - >GRMZM2G463730_P02	superfamily	335217	73	100	0.0052901	37.3157	cl44389	FAR1 superfamily	N	-	28

## Sheet: rename
protein ID	rename
GRMZM2G001663_P01	ZmFAR01.1
GRMZM2G463730_P01	ZmFAR02.1
GRMZM2G463730_P02	ZmFAR02.2
GRMZM2G155980_P01	ZmFAR03.1
GRMZM2G155980_P02	ZmFAR03.2
GRMZM2G034868_P01	ZmFAR04.1
GRMZM2G034868_P02	ZmFAR04.2
GRMZM2G302323_P01	ZmFAR05.1
GRMZM2G043250_P01	ZmFAR06.1
GRMZM2G117108_P01	ZmFAR07.1
GRMZM2G117108_P02	ZmFAR07.2
GRMZM2G106653_P01	ZmFAR08.1
GRMZM2G406651_P01	ZmFAR09.1
GRMZM2G406651_P02	ZmFAR09.2
GRMZM2G048987_P01	ZmFAR10.1
GRMZM2G048987_P02	ZmFAR10.2
GRMZM2G048987_P03	ZmFAR10.3
GRMZM2G129311_P01	ZmFAR11.1
GRMZM2G129311_P02	ZmFAR11.2
GRMZM2G114461_P01	ZmFAR12.1
GRMZM2G114461_P02	ZmFAR12.2
GRMZM2G148940_P01	ZmFAR13.1
GRMZM2G104268_P01	ZmFAR14.1
GRMZM2G104268_P02	ZmFAR14.2

## Sheet: Motif
Motif		protein ID	Start	p-value	Sites	length
Motif 1	1	GRMZM2G048987_P03	257	1.77e-53	FGDAIIFDTTYRTNKYNLICAPFVGVDHHWQNVVFGCAFLLDESVTSYAW	50
Motif 1	2	GRMZM2G048987_P02	257	1.77e-53	FGDAIIFDTTYRTNKYNLICAPFVGVDHHWQNVVFGCAFLLDESVTSYAW	50
Motif 1	3	GRMZM2G048987_P01	257	1.77e-53	FGDAIIFDTTYRTNKYNLICAPFVGVDHHWQNVVFGCAFLLDESVTSYAW	50
Motif 1	4	GRMZM2G114461_P02	265	1.09e-48	FGDVLCLDTTYKINGYGRPLALFLGVNHHKQTIIFGAAMLYDESFDSYKW	50
Motif 1	5	GRMZM2G114461_P01	321	1.09e-48	FGDVLCLDTTYKINGYGRPLALFLGVNHHKQTIIFGAAMLYDESFDSYKW	50
Motif 1	6	GRMZM2G034868_P02	324	1.92e-48	FRDVVIFDTSYLTNKYNMICAPFIGLNNHRQNVMFGCAFLLDESLTSYEW	50
Motif 1	7	GRMZM2G034868_P01	292	1.92e-48	FRDVVIFDTSYLTNKYNMICAPFIGLNNHRQNVMFGCAFLLDESLTSYEW	50
Motif 1	8	GRMZM2G406651_P02	411	6.67e-48	FGDVVCFDTTYALNIYGRPFALFVGVDNHKQLLVFGAALLYDESIQSLKW	50
Motif 1	9	GRMZM2G406651_P01	411	6.67e-48	FGDVVCFDTTYALNIYGRPFALFVGVDNHKQLLVFGAALLYDESIQSLKW	50
Motif 1	10	GRMZM2G129311_P02	441	2.56e-47	FGDVVCFDSGYALQGYDRPLALFTGVNHHKQTVIFGAAIIYDESKEAFQW	50
Motif 1	11	GRMZM2G129311_P01	498	2.56e-47	FGDVVCFDSGYALQGYDRPLALFTGVNHHKQTVIFGAAIIYDESKEAFQW	50
Motif 1	12	GRMZM2G463730_P02	619	3.06e-45	FGDVVCVDTRYCTSDYGRPLLLFTGVNHHNQLIIFGSALIYDDSAQSFRW	50
Motif 1	13	GRMZM2G463730_P01	619	3.06e-45	FGDVVCVDTRYCTSDYGRPLLLFTGVNHHNQLIIFGSALIYDDSAQSFRW	50
Motif 1	14	GRMZM2G117108_P02	306	1.12e-43	GHDVVYFDTSYLTEKYDLPLVFFTGMNNHGQPVLFGTALLSDLSVDSYAW	50
Motif 1	15	GRMZM2G117108_P01	301	1.12e-43	GHDVVYFDTSYLTEKYDLPLVFFTGMNNHGQPVLFGTALLSDLSVDSYAW	50
Motif 1	16	GRMZM2G155980_P02	305	3.41e-43	FSDAVWIDTACLRNKYHVPLVSFLGVNHHGQLVLLGCGLLSDESTESFLW	50
Motif 1	17	GRMZM2G155980_P01	305	3.41e-43	FSDAVWIDTACLRNKYHVPLVSFLGVNHHGQLVLLGCGLLSDESTESFLW	50
Motif 1	18	GRMZM2G043250_P01	273	5.9e-43	FCDVVVFDSTYRLSKHNLICAPFVGVNHHWQTTMYGCALLADESTSAFVW	50
Motif 1	19	GRMZM2G148940_P01	259	5.48e-41	FGDAVYFDTTCSQNENMLPFAAFTGVNHHGDTVVFGCALILDRTESSYGW	50
Motif 1	20	GRMZM2G302323_P01	397	1.11e-40	FGDAVRFETTYRKNKETIPIVIFSGVNHHVQPVVFGCALLLDESEASFTW	50
Motif 1	21	GRMZM2G106653_P01	253	2.35e-39	YSDVITLDTSYVASKYDMPLATFIGVNHHGQSVLMGCALLSDETAETYSW	50
Motif 1	22	GRMZM2G104268_P02	514	5.12e-37	FGDVVAINVTNFSDQYDMQFVSFMGTNHHAQPVLLGCGLLAGRSLGAYVW	50
Motif 1	23	GRMZM2G104268_P01	514	5.12e-37	FGDVVAINVTNFSDQYDMQFVSFMGTNHHAQPVLLGCGLLAGRSLGAYVW	50
Motif 2	1	GRMZM2G463730_P02	912	1.17e-44	CSCKKFEFMGLLCCHVLKILDLRNIKELPRHYILKRWRKDA	41
Motif 2	2	GRMZM2G463730_P01	912	1.17e-44	CSCKKFEFMGLLCCHVLKILDLRNIKELPRHYILKRWRKDA	41
Motif 2	3	GRMZM2G406651_P02	706	1.91e-43	CSCKKFEAVGIQCCHVLKVLDLKNIKELPEQYILKRWRKDA	41
Motif 2	4	GRMZM2G406651_P01	706	1.91e-43	CSCKKFEAVGIQCCHVLKVLDLKNIKELPEQYILKRWRKDA	41
Motif 2	5	GRMZM2G048987_P03	555	3.28e-42	CGCRKFERMGLLCSHALKVFTLQNVDTIPEKYVLKRWTKDA	41
Motif 2	6	GRMZM2G048987_P02	555	3.28e-42	CGCRKFERMGLLCSHALKVFTLQNVDTIPEKYVLKRWTKDA	41
Motif 2	7	GRMZM2G048987_P01	555	3.28e-42	CGCRKFERMGLLCSHALKVFTLQNVDTIPEKYVLKRWTKDA	41
Motif 2	8	GRMZM2G129311_P02	736	4.43e-42	CTCKTFEFIGIPCRHMLKVLDMRNIKDLPAQYIMKRWRKDA	41
Motif 2	9	GRMZM2G129311_P01	793	4.43e-42	CTCKTFEFIGIPCRHMLKVLDMRNIKDLPAQYIMKRWRKDA	41
Motif 2	10	GRMZM2G114461_P02	560	1.65e-41	CTCRKFEFMGIPCCHMLKVLDYRNIKELPQKYLLKRWRRTA	41
Motif 2	11	GRMZM2G114461_P01	616	1.65e-41	CTCRKFEFMGIPCCHMLKVLDYRNIKELPQKYLLKRWRRTA	41
Motif 2	12	GRMZM2G034868_P02	621	7.35e-38	CTCKKFETMRILCSHALNALVLKNVDRIPERYILNRWTKYA	41
Motif 2	13	GRMZM2G034868_P01	589	7.35e-38	CTCKKFETMRILCSHALNALVLKNVDRIPERYILNRWTKYA	41
Motif 2	14	GRMZM2G043250_P01	572	3.19e-37	CSCSKFETMGLLCPHALKALSIKNICKIPESYILKRWTKDA	41
Motif 2	15	GRMZM2G155980_P02	603	3.56e-37	CNCGLFQFHGIVCRHALSVLKWQQVYDIPPCYVLNRWRADF	41
Motif 2	16	GRMZM2G155980_P01	603	3.56e-37	CNCGLFQFHGIVCRHALSVLKWQQVYDIPPCYVLNRWRADF	41
Motif 2	17	GRMZM2G117108_P02	611	2.79e-36	CECGFVQFTGILCRHALSVLKLQEIFEIPKDYVLDRWRRDY	41
Motif 2	18	GRMZM2G117108_P01	606	2.79e-36	CECGFVQFTGILCRHALSVLKLQEIFEIPKDYVLDRWRRDY	41
Motif 2	19	GRMZM2G104268_P02	812	7.48e-35	CLCRLYQSKGILCRHALTVLRQELVLMIPQKYIIHRWCKDC	41
Motif 2	20	GRMZM2G104268_P01	812	7.48e-35	CLCRLYQSKGILCRHALTVLRQELVLMIPQKYIIHRWCKDC	41
Motif 2	21	GRMZM2G106653_P01	556	9.13e-35	CICGGFQFSGILCRHSLSMLKFQLVREIPQHYILDRWKKDF	41
Motif 2	22	GRMZM2G302323_P01	693	1.65e-34	CSCCLFESCGILCRHALRIFIIEGVHDLPKAYILKRWTKHA	41
Motif 2	23	GRMZM2G148940_P01	555	1.48e-30	CECCRFAFSAILCRHVLSVFLLAGVIMLPEPCITKRWTKKA	41
Motif 3	1	GRMZM2G048987_P03	381	1.63e-43	SEEDFKESWTAMIQEYKLQDNNWLIDLYTFHHKWCSAFNKDTFDGGI	47
Motif 3	2	GRMZM2G048987_P02	381	1.63e-43	SEEDFKESWTAMIQEYKLQDNNWLIDLYTFHHKWCSAFNKDTFDGGI	47
Motif 3	3	GRMZM2G048987_P01	381	1.63e-43	SEEDFKESWTAMIQEYKLQDNNWLIDLYTFHHKWCSAFNKDTFDGGI	47
Motif 3	4	GRMZM2G129311_P02	566	1.85e-40	DEDEFVTAWKEMLEKYDLEDNQWLADLFSIKEKWALAYGRDAFYADM	47
Motif 3	5	GRMZM2G129311_P01	623	1.85e-40	DEDEFVTAWKEMLEKYDLEDNQWLADLFSIKEKWALAYGRDAFYADM	47
Motif 3	6	GRMZM2G117108_P02	430	3.81e-39	KIPEFEMEWKKIIEEHGLGGNECLSSLYEHRQLWAPAYLRDKFWAGM	47
Motif 3	7	GRMZM2G117108_P01	425	3.81e-39	KIPEFEMEWKKIIEEHGLGGNECLSSLYEHRQLWAPAYLRDKFWAGM	47
Motif 3	8	GRMZM2G463730_P02	742	9.16e-39	EEDNFYSSWEILSEKYNIKDNEWFCKLYEDRERWALPYGRDTFCADI	47
Motif 3	9	GRMZM2G463730_P01	742	9.16e-39	EEDNFYSSWEILSEKYNIKDNEWFCKLYEDRERWALPYGRDTFCADI	47
Motif 3	10	GRMZM2G114461_P02	390	2.77e-38	DEDEFVFSWRSMLEKYDLRHNEWLSKVFAEKEQWALAYDRHIFCADI	47
Motif 3	11	GRMZM2G114461_P01	446	2.77e-38	DEDEFVFSWRSMLEKYDLRHNEWLSKVFAEKEQWALAYDRHIFCADI	47
Motif 3	12	GRMZM2G155980_P02	429	8.12e-38	NDNEFEARWKNWIDRFSLQDNEWITFLYENRHLWAPAFLRDTFSAGL	47
Motif 3	13	GRMZM2G155980_P01	429	8.12e-38	NDNEFEARWKNWIDRFSLQDNEWITFLYENRHLWAPAFLRDTFSAGL	47
Motif 3	14	GRMZM2G104268_P02	638	9.14e-38	TMTDFDREWQDTIQHFRLERNEWLSKLYEVRMQWAPVYVKDSFWAGM	47
Motif 3	15	GRMZM2G104268_P01	638	9.14e-38	TMTDFDREWQDTIQHFRLERNEWLSKLYEVRMQWAPVYVKDSFWAGM	47
Motif 3	16	GRMZM2G034868_P02	448	1.43e-36	SEAELDETWAMMHHEYNMQEHPWLTDLYQQRHKWCSALHKDAFDGGI	47
Motif 3	17	GRMZM2G034868_P01	416	1.43e-36	SEAELDETWAMMHHEYNMQEHPWLTDLYQQRHKWCSALHKDAFDGGI	47
Motif 3	18	GRMZM2G043250_P01	397	4.96e-35	SEAEFEETWAQMLCEFKLQDNKWLKKLYKLKQKWCSALNNCTFDGGI	47
Motif 3	19	GRMZM2G406651_P02	536	1.25e-34	DEIEFLSAWEKLVEKHDIGESEWLSRLYLEKEKWALPYQRTMFSADI	47
Motif 3	20	GRMZM2G406651_P01	536	1.25e-34	DEIEFLSAWEKLVEKHDIGESEWLSRLYLEKEKWALPYQRTMFSADI	47
Motif 3	21	GRMZM2G106653_P01	377	5.35e-33	TIDEFEEEWNTLITYSGLQSNDWLRSLYECRSSWVPVFIKDTFWAGM	47
Motif 3	22	GRMZM2G148940_P01	384	9.41e-30	TAVIFDMLWGSILDKYGLRDDNWLQSLYEIRHKWVPAYLTSFFFAEL	47
Motif 3	23	GRMZM2G302323_P01	522	1.4e-27	IEELFDSGWNSVIIKHELSNNELLQSLYDIRQRWAPAYTKNVFYPRN	47
Motif 4	1	GRMZM2G114461_P02	44	7.04e-29	PEVGMEFVSEEKAYEFYNKYAGHVGFSVR	29
Motif 4	2	GRMZM2G114461_P01	100	7.04e-29	PEVGMEFVSEEKAYEFYNKYAGHVGFSVR	29
Motif 4	3	GRMZM2G406651_P02	211	1.68e-27	PRADMHFETEEDAYVFYNRYAEHVGFSVR	29
Motif 4	4	GRMZM2G406651_P01	211	1.68e-27	PRADMHFETEEDAYVFYNRYAEHVGFSVR	29
Motif 4	5	GRMZM2G048987_P03	39	3.28e-27	ELLGCVVHSEEEAYRLYCDYGHRIGFSVR	29
Motif 4	6	GRMZM2G048987_P02	39	3.28e-27	ELLGCVVHSEEEAYRLYCDYGHRIGFSVR	29
Motif 4	7	GRMZM2G048987_P01	39	3.28e-27	ELLGCVVHSEEEAYRLYCDYGHRIGFSVR	29
Motif 4	8	GRMZM2G463730_P02	422	3.22e-26	PKVGMVFLNEDKAYEFYANYAETAGFSVR	29
Motif 4	9	GRMZM2G463730_P01	422	3.22e-26	PKVGMVFLNEDKAYEFYANYAETAGFSVR	29
Motif 4	10	GRMZM2G104268_P02	297	1.06e-25	PRVGMIFDSEEDAFQFYVTYGCHAGFGIT	29
Motif 4	11	GRMZM2G104268_P01	297	1.06e-25	PRVGMIFDSEEDAFQFYVTYGCHAGFGIT	29
Motif 4	12	GRMZM2G129311_P02	98	8.17e-25	PKVNMLFDGESDAYEFYNAYAEKVGFFVR	29
Motif 4	13	GRMZM2G129311_P01	155	8.17e-25	PKVNMLFDGESDAYEFYNAYAEKVGFFVR	29
Motif 4	14	GRMZM2G034868_P02	114	1.57e-24	ELRNKVAYSEEEAYRLYCDYGHRMGFSVR	29
Motif 4	15	GRMZM2G034868_P01	82	1.57e-24	ELRNKVAYSEEEAYRLYCDYGHRMGFSVR	29
Motif 4	16	GRMZM2G302323_P01	72	3.66e-24	PRLGMEFESGEAAKTFYIAYAGRVGFSVR	29
Motif 4	17	GRMZM2G155980_P02	108	3.66e-24	PRDGMVFKSYEEVLNFYKRYALRTGFGVC	29
Motif 4	18	GRMZM2G155980_P01	108	3.66e-24	PRDGMVFKSYEEVLNFYKRYALRTGFGVC	29
Motif 4	19	GRMZM2G043250_P01	79	3.4e-23	ELLRKVVCSEEAAYKLYCDYGHRMGFSIR	29
Motif 4	20	GRMZM2G148940_P01	69	1.18e-21	PRMGMEFDSDAAARAFYNAYALCFGFGIR	29
Motif 4	21	GRMZM2G106653_P01	39	6.73e-21	PEVGMVFNNHTEVNRFYRRYARRVGFGVS	29
Motif 4	22	GRMZM2G117108_P02	109	1.32e-20	PRVGLRFKTYDDALKYYKQYAEDSGFSAI	29
Motif 4	23	GRMZM2G117108_P01	104	1.32e-20	PRVGLRFKTYDDALKYYKQYAEDSGFSAI	29
Motif 4	24	GRMZM2G001663_P01	53	1.56e-20	PYEGMEFESEDAARDFYSTYARSAGFRIR	29
Motif 5	1	GRMZM2G034868_P02	284	1.66e-28	YFKRRTNEQCMFYWDVEVDQEGRMTNFFW	29
Motif 5	2	GRMZM2G034868_P01	252	1.66e-28	YFKRRTNEQCMFYWDVEVDQEGRMTNFFW	29
Motif 5	3	GRMZM2G114461_P02	225	4.12e-28	YLQTMQMDNPSFFYTMQIDEDDKLTNFFW	29
Motif 5	4	GRMZM2G114461_P01	281	4.12e-28	YLQTMQMDNPSFFYTMQIDEDDKLTNFFW	29
Motif 5	5	GRMZM2G463730_P02	579	9.94e-28	YLQRMKGENPSFFYAIQVDEDDMFTNVFW	29
Motif 5	6	GRMZM2G463730_P01	579	9.94e-28	YLQRMKGENPSFFYAIQVDEDDMFTNVFW	29
Motif 5	7	GRMZM2G048987_P03	217	2.03e-27	YFKHKTNEEGMFYWDVQVDQEGRMTNFFY	29
Motif 5	8	GRMZM2G048987_P02	217	2.03e-27	YFKHKTNEEGMFYWDVQVDQEGRMTNFFY	29
Motif 5	9	GRMZM2G048987_P01	217	2.03e-27	YFKHKTNEEGMFYWDVQVDQEGRMTNFFY	29
Motif 5	10	GRMZM2G129311_P02	401	1.05e-26	YLQKVQHDNPSFFYAVKSDDDGNFTNFFW	29
Motif 5	11	GRMZM2G129311_P01	458	1.05e-26	YLQKVQHDNPSFFYAVKSDDDGNFTNFFW	29
Motif 5	12	GRMZM2G117108_P02	265	4.38e-26	FFGNMQNKNPYFFYLVDLDNQGRLRNLFW	29
Motif 5	13	GRMZM2G117108_P01	260	4.38e-26	FFGNMQNKNPYFFYLVDLDNQGRLRNLFW	29
Motif 5	14	GRMZM2G104268_P02	474	4.04e-24	FLNKMQDQNPCFFYSLDMNEQGQLRNVFW	29
Motif 5	15	GRMZM2G104268_P01	474	4.04e-24	FLNKMQDQNPCFFYSLDMNEQGQLRNVFW	29
Motif 5	16	GRMZM2G043250_P01	233	3.21e-23	HLKSRANEDGMFYWDVQLDRGGRMTNFFW	29
Motif 5	17	GRMZM2G302323_P01	357	4.9e-23	YLKKRQEEDPSFFYAVQYEKNGHSTNIFW	29
Motif 5	18	GRMZM2G106653_P01	213	2.08e-22	FFTRMQAKNANFFNVIDLDDEGCTRNVFW	29
Motif 5	19	GRMZM2G155980_P02	265	6.55e-19	FFTQMQAKLPNSFYVMDFYVEGHLRSVLW	29
Motif 5	20	GRMZM2G155980_P01	265	6.55e-19	FFTQMQAKLPNSFYVMDFYVEGHLRSVLW	29
Motif 5	21	GRMZM2G148940_P01	219	4.1e-18	YFKKMQSDNSSFFFSIQVDSKNYVSNAVW	29
Motif 5	22	GRMZM2G406651_P02	370	4.83e-18	YLEELQVENPSVYYAVGVGPDGKSAVNFF	29
Motif 5	23	GRMZM2G406651_P01	370	4.83e-18	YLEELQVENPSVYYAVGVGPDGKSAVNFF	29
Motif 6	1	GRMZM2G048987_P03	307	1.04e-29	VFKSFLESMGGRSPKSIFTDQDEAIMQAVKQ	31
Motif 6	2	GRMZM2G048987_P02	307	1.04e-29	VFKSFLESMGGRSPKSIFTDQDEAIMQAVKQ	31
Motif 6	3	GRMZM2G048987_P01	307	1.04e-29	VFKSFLESMGGRSPKSIFTDQDEAIMQAVKQ	31
Motif 6	4	GRMZM2G155980_P02	355	6.67e-28	LFKSWLTCMKGQPPNAIVTDECVAIKAAVRE	31
Motif 6	5	GRMZM2G155980_P01	355	6.67e-28	LFKSWLTCMKGQPPNAIVTDECVAIKAAVRE	31
Motif 6	6	GRMZM2G034868_P02	374	1.58e-24	LFKSFLESVGGRPPETIFTDQNEFISKAIEV	31
Motif 6	7	GRMZM2G034868_P01	342	1.58e-24	LFKSFLESVGGRPPETIFTDQNEFISKAIEV	31
Motif 6	8	GRMZM2G463730_P02	669	2.72e-24	LFETFKSAMSGKQPKTVLTDQSAALSDAVSS	31
Motif 6	9	GRMZM2G463730_P01	669	2.72e-24	LFETFKSAMSGKQPKTVLTDQSAALSDAVSS	31
Motif 6	10	GRMZM2G129311_P02	491	7.02e-24	LLDTFKMAMNGTHPKTLLTDRSVALSEAVAA	31
Motif 6	11	GRMZM2G129311_P01	548	7.02e-24	LLDTFKMAMNGTHPKTLLTDRSVALSEAVAA	31
Motif 6	12	GRMZM2G104268_P02	564	1.44e-23	LFGTWLRCMNAKPPHSIITNYCHDVAIAIKK	31
Motif 6	13	GRMZM2G104268_P01	564	1.44e-23	LFGTWLRCMNAKPPHSIITNYCHDVAIAIKK	31
Motif 6	14	GRMZM2G117108_P02	356	3.21e-23	LLRAFLSCMKGLCPKAIITEHYNAIMDAVQE	31
Motif 6	15	GRMZM2G117108_P01	351	3.21e-23	LLRAFLSCMKGLCPKAIITEHYNAIMDAVQE	31
Motif 6	16	GRMZM2G106653_P01	303	4.32e-23	LLKSWIACMYGNLPKAIVTDYCRGIQSAVAE	31
Motif 6	17	GRMZM2G114461_P02	315	5.05e-22	LFDSFKIAMHGKQPAVALIDQSIPLSSAMAA	31
Motif 6	18	GRMZM2G114461_P01	371	5.05e-22	LFDSFKIAMHGKQPAVALIDQSIPLSSAMAA	31
Motif 6	19	GRMZM2G043250_P01	323	6.63e-22	LFKSFLESMGNRHPQSIFTNLDQVVTKAVEE	31
Motif 6	20	GRMZM2G406651_P02	461	2.99e-21	VFEVFADAMHARHPQTILIDERPECAIAAAE	31
Motif 6	21	GRMZM2G406651_P01	461	2.99e-21	VFEVFADAMHARHPQTILIDERPECAIAAAE	31
Motif 6	22	GRMZM2G302323_P01	447	9.74e-20	LFEKWLEAMHMGPPVSLLTELNRGMAAAVAK	31
Motif 6	23	GRMZM2G148940_P01	309	1.05e-19	IFETWLTAMDSRLPFSLTTDEGKGIAAAVAK	31
Motif 7	1	GRMZM2G048987_P03	75	1.47e-54	IGTKNIRTKDYYCSKEGLKYDEPVTEANFNRPDTRTNCKAMIRF	44
Motif 7	2	GRMZM2G048987_P02	75	1.47e-54	IGTKNIRTKDYYCSKEGLKYDEPVTEANFNRPDTRTNCKAMIRF	44
Motif 7	3	GRMZM2G048987_P01	75	1.47e-54	IGTKNIRTKDYYCSKEGLKYDEPVTEANFNRPDTRTNCKAMIRF	44
Motif 7	4	GRMZM2G034868_P02	150	1.82e-50	TGTKTIRTKDYYCSKEGLKDDEQLTEANFNKPETRTNCKAMVRF	44
Motif 7	5	GRMZM2G034868_P01	118	1.82e-50	TGTKTIRTKDYYCSKEGLKDDEQLTEANFNKPETRTNCKAMVRF	44
Motif 7	6	GRMZM2G043250_P01	115	1.55e-41	TGTKRIRTKDYFCSKEGLKEGEKLTDANFNDPHTRTNCRAMVRF	44
Motif 7	7	GRMZM2G463730_P02	457	3.5e-35	TAKNVTKSRAYVCSKEGFRPRSASIESKKPSLEARTGCQAHMTI	44
Motif 7	8	GRMZM2G463730_P01	457	3.5e-35	TAKNVTKSRAYVCSKEGFRPRSASIESKKPSLEARTGCQAHMTI	44
Motif 7	9	GRMZM2G114461_P02	79	6.66e-35	SSENITKVRTFVCSREGYNRDKKSLEAKKPRLDTRIGCPARLII	44
Motif 7	10	GRMZM2G114461_P01	135	6.66e-35	SSENITKVRTFVCSREGYNRDKKSLEAKKPRLDTRIGCPARLII	44
Motif 8	1	GRMZM2G129311_P02	670	1.28e-22	MRMLRQAANAYTPSAFKMFEREF	23
Motif 8	2	GRMZM2G129311_P01	727	1.28e-22	MRMLRQAANAYTPSAFKMFEREF	23
Motif 8	3	GRMZM2G406651_P02	640	7.27e-22	LRMLKQSSNAYTPEAFKMFQGEF	23
Motif 8	4	GRMZM2G406651_P01	640	7.27e-22	LRMLKQSSNAYTPEAFKMFQGEF	23
Motif 8	5	GRMZM2G106653_P01	482	4.06e-21	FYMEEQLSKVYTHNMFKKFQDEI	23
Motif 8	6	GRMZM2G048987_P03	487	2.21e-20	STVLKQAAESYTHRIYKLFEAEF	23
Motif 8	7	GRMZM2G048987_P02	487	2.21e-20	STVLKQAAESYTHRIYKLFEAEF	23
Motif 8	8	GRMZM2G048987_P01	487	2.21e-20	STVLKQAAESYTHRIYKLFEAEF	23
Motif 8	9	GRMZM2G117108_P02	535	1.17e-19	FYMEEQLAKAYTINMFRKFQDEL	23
Motif 8	10	GRMZM2G117108_P01	530	1.17e-19	FYMEEQLAKAYTINMFRKFQDEL	23
Motif 8	11	GRMZM2G463730_P02	846	3.03e-19	LHLLWQAANLYTPTLFEMFRMEY	23
Motif 8	12	GRMZM2G463730_P01	846	3.03e-19	LHLLWQAANLYTPTLFEMFRMEY	23
Motif 8	13	GRMZM2G114461_P02	494	2.73e-18	AKMLKQTAHTYTPVVFEIFRKEF	23
Motif 8	14	GRMZM2G114461_P01	550	2.73e-18	AKMLKQTAHTYTPVVFEIFRKEF	23
Motif 8	15	GRMZM2G155980_P02	534	5.06e-18	YQMEEQLSRLYTLNMFMKFQDEL	23
Motif 8	16	GRMZM2G155980_P01	534	5.06e-18	YQMEEQLSRLYTLNMFMKFQDEL	23
Motif 8	17	GRMZM2G104268_P02	743	6.84e-18	LPVEDQAAKVYTAEIFQKFFNEI	23
Motif 8	18	GRMZM2G104268_P01	743	6.84e-18	LPVEDQAAKVYTAEIFQKFFNEI	23
Motif 8	19	GRMZM2G043250_P01	503	1.5e-17	SDILNHAAKVYTHRIYKLFETDF	23
Motif 8	20	GRMZM2G034868_P02	554	7.06e-16	NRILQHAAEVYTHKVYKSIETDF	23
Motif 8	21	GRMZM2G034868_P01	522	7.06e-16	NRILQHAAEVYTHKVYKSIETDF	23
Motif 8	22	GRMZM2G148940_P01	489	2.23e-14	MVLEKQARSIYTRAAFETFQLEL	23
Motif 8	23	GRMZM2G302323_P01	627	4.65e-14	SPVEKQGSSIFTSTIFGLFQGQF	23

## Sheet: Motif-2
	Logo	E-value	Sites	Width
1		2.7e-614	23	50		Motif 1	50
2		4.8e-532	23	41		Motif 2	41
3		1.7e-444	23	47		Motif 3	47
4		7e-291	24	29		Motif 4	29
5		1.3e-260	23	29		Motif 5	29
6		4.4e-238	23	31		Motif 6	31
7		1.9e-176	10	44		Motif 7	44
8		1e-171	23	23		Motif 8	23

## Sheet: secondary structure
	secondary structure
ID	Alpha helix(Hh)	Extended strand(Ee)	Beta turn(Tt)	Beta sheet	Random coil(Cc)
ZmFAR01.1	0.2673	0.1471	0.0646	0	0.521
ZmFAR02.1	0.3723	0.1386	0.0684	0	0.4207
ZmFAR02.2	0.3885	0.1339	0.0591	0	0.4185
ZmFAR03.1	0.4137	0.1309	0.0521	0	0.4032
ZmFAR03.2	0.4218	0.1506	0.0368	0	0.3908
ZmFAR04.1	0.4284	0.1297	0.0306	0	0.4113
ZmFAR04.2	0.4339	0.1438	0.0415	0	0.3808
ZmFAR05.1	0.4365	0.1153	0.0341	0	0.4141
ZmFAR06.1	0.4658	0.1426	0.0422	0	0.3493
ZmFAR07.1	0.3811	0.132	0.0353	0	0.4516
ZmFAR07.2	0.376	0.1268	0.0385	0	0.4587
ZmFAR08.1	0.405	0.1429	0.0422	0	0.4099
ZmFAR09.1	0.4164	0.1532	0.0339	0	0.3965
ZmFAR09.2	0.4164	0.1532	0.0339	0	0.3965
ZmFAR10.1	0.4942	0.1246	0.042	0	0.3391
ZmFAR10.2	0.4377	0.1361	0.0321	0	0.3941
ZmFAR10.3	0.4377	0.1361	0.0321	0	0.3941
ZmFAR11.1	0.409	0.1496	0.0345	0	0.4069
ZmFAR11.2	0.4071	0.1335	0.03	0	0.4294
ZmFAR12.1	0.4474	0.142	0.0384	0	0.3722
ZmFAR12.2	0.4475	0.1466	0.0448	0	0.3611
ZmFAR13.1	0.477	0.1337	0.0342	0	0.3551
ZmFAR14.1	0.4379	0.1163	0.0459	0	0.3998
ZmFAR14.2	0.4136	0.1146	0.0439	0	0.4279
