# Supplementary material for: Comprehensive identification and expression analysis of FAR1/FHY3 genes under drought stress in maize (Zea mays L.)
Source: PeerJ. 2024 Jun 28;12:e17684. doi: 10.7717/peerj.17684 (PMC11216215; doi:10.7717/peerj.17684)
Supplement: Supplemental Information 3 [file peerj-12-17684-s003.xlsx]

## Sheet: qPCR protocol
qPCR protocol
Total RNA was extracted using RNAiso Plus (TaKaRa, Dalian), cDNA was obtained by reverse transcription reaction using PrimeScriptTM RT reagent Kit with gDNA Eraser (TaKaRa, Dalian). The cDNA template was diluted for 30-fold and then stored at -20°C for later use. ZmFAR-specific primers were designed using Beacon Designer software (Table S1), and the expression level of ZmFARs was detected by CFX9…

## Sheet: PCR -primer
gene ID	CDNA ID	cdna sequence	Forward Primer (5'-3')	Reverse Primer (5'-3')	start position	end position	prodoct	length (bp)
ZmFAR01	ZmFAR01.1	GTCCGCTTTCTTTAATCAATCCTCCGCGCCCCACAACCCCAAGCAACTCCCACTAATCGTCCCCTTTCCTTCCCTTTCCCGGCGGGGGCAACAATGGTCGGTGACGGCGATCGGTTTGCTGCATCGGCGGTTCCTGCGGCGCCGTGCAGGTTTCTCGGTCACCTGTGAGCTCGATTTGACCGCCCCCACCTGGCGTCGTGCTGGTTCCGTTCTGGGTATTCTTGGCGCTGGTCTGGGCTCTGGGGCGATCGGGACACACCTCCGCTCTGCTTATCGAGGGTCGAGGCACCCGACGATCTTCTCCGGAAAAGCGCCCTACTCTTCATACCATCAGGTAGGGCCATATCTGAACAACTTCTGAGTACAGTGAGTGTCCTGATAAACAGATATGTAACTATG…	CCCATAAGACAGACACAA	GCATCTTCAAGAGGAACA	2195	2326	CCCATAAGACAGACACAAAAAGGTATTTGTGCTTTAGGTCCATTTGGAGGTGTTCTGTCTGAACTGAAGAACCAAGGAACAGTCCCCAAATCTATAGTTCATGCTACAGCTCTTGCTTGTGGTGCTCGTGCTGTTCCTCTTGAAGATGC	149
ZmFAR02	ZmFAR02.1	AAATCCCGCTCGAACCCTAGTAACTACCTACCCCGCATGGTCGATCGTGCCGCCGCGCGGGCACAGGCGGTGAGCTCCGACCCGCCGCCGCCTGCACTGCTGGAGCCCGACCCGCGGCTCAGCCAGCCCGGGGCCGCTGATGGGCAAGAGGTCGCTTCGGCGGGTGCGACCGCGGGTCCGCCTTCCCTGCCCCAGGCCAGCGACGCTGAGGAAGACGCTCTTGCCTCGCCAGCGGGGCAGCCGGGCGAGCGGTGCAGAGCGATGATGGAGGTGGTGGCCAAAGACGGGGCGTGGAAGGTGACCAAGCTGGTGGTGGAGCACTGCCACGAGCTGCAGGTCGCCCCCGGACATGTCGCGGTGACCGTGCCAGCGTTGGGGATGGAATTCGACTCCGTAGAC…	CGATGCAGTTTCTTCTTG	TGTCCTCCTCATATTCATAC	2118	2250	CGATGCAGTTTCTTCTTGGCCTGGAACCATCCACCGCTTCTCACTACTGCATTTGTATCTGAATGCTACTAAGATAAGCAGGGATACCTTACAAGGCTTGGAGACTTTTGCATCAGATTTTAGTAGGTGGCTGTATGAATATGAGGAGGACA	152
	ZmFAR02.2	AAATCCCGCTCGAACCCTAGTAACTACCTACCCCGCATGGTCGATCGTGCCGCCGCGCGGGCACAGGCGGTGAGCTCCGACCCGCCGCCGCCTGCACTGCTGGAGCCCGACCCGCGGCTCAGCCAGCCCGGGGCCGCTGATGGGCAAGAGGTCGCTTCGGCGGGTGCGACCGCGGGTCCGCCTTCCCTGCCCCAGGCCAGCGACGCTGAGGAAGACGCTCTTGCCTCGCCAGCGGGGCAGCCGGGCGAGCGGTGCAGAGCGATGATGGAGGTGGTGGCCAAAGACGGGGCGTGGAAGGTGACCAAGCTGGTGGTGGAGCACTGCCACGAGCTGCAGGTCGCCCCCGGACATGTCGCGGTGACCGTGCCAGCGTTGGGGATGGAATTCGACTCCGTAGAC…	CGATGCAGTTTCTTCTTG	TGTCCTCCTCATATTCATAC	2118	2250	CGATGCAGTTTCTTCTTGGCCTGGAACCATCCACCGCTTCTCACTACTGCATTTGTATCTGAATGCTACTAAGATAAGCAGGGATACCTTACAAGGCTTGGAGACTTTTGCATCAGATTTTAGTAGGTGGCTGTATGAATATGAGGAGGACA	152
ZmFAR03	ZmFAR03.1	ATGACTGTATCCTATCGTCCCCAAGAGTTTGTTCGCGTGATTCCGCCTCTGATTGGGTCGTGGATCAGCAGGGGGCCAAGCATGATGGAGGTGGGTTTGAACCCGGGGGAGGAGCTGGACTTCGGGGACAACCAGGAGGACGACGACGACGCGGGGGACATCTCACCCGCCAGCAAGGAGCTGGCCGCCATGGTGGCGGCGGCGGCGGCGGCGGAGACAGTCGAGCTTGACGACGGCGGCGCCGGTGTCGAGGCGGCCGCCTCCGCTGCCGCCGCCGCGTCGTCGTCGTCAGCGGCGGCGCGGTACGGGGACGACCGCACGCCGCGGGACGGGATGGTGTTCAAGTCCTACGAGGAGGTGCTCAACTTCTACAAGCGCTATGCCCTGCGCACGGGCTTC…	ACGCCATAGAATAAGTGA	GGTGATCCATTCATTATCC	1170	1341	ACGCCATAGAATAAGTGATTGGCATGTAGTGAGAAGTATTTCAGAAAAAATAGGTGACTTGCCAGAATATGAAGCGATGAGAACCAATTTGGTTACTGTAATATATGATTCTTTAAACGACAATGAGTTTGAGGCAAGGTGGAAGAACTGGATTGATAGATTTAGCCTTCAGGATAATGAATGGATCACC	190
	ZmFAR03.2	ATGACTGTATCCTATCGTCCCCAAGAGTTTGTTCGCGTGATTCCGCCTCTGATTGGGTCGTGGATCAGCAGGGGGCCAAGCATGATGGAGGTGGGTTTGAACCCGGGGGAGGAGCTGGACTTCGGGGACAACCAGGAGGACGACGACGACGCGGGGGACATCTCACCCGCCAGCAAGGAGCTGGCCGCCATGGTGGCGGCGGCGGCGGCGGCGGAGACAGTCGAGCTTGACGACGGCGGCGCCGGTGTCGAGGCGGCCGCCTCCGCTGCCGCCGCCGCGTCGTCGTCGTCAGCGGCGGCGCGGTACGGGGACGACCGCACGCCGCGGGACGGGATGGTGTTCAAGTCCTACGAGGAGGTGCTCAACTTCTACAAGCGCTATGCCCTGCGCACGGGCTTC…	ACGCCATAGAATAAGTGA	GGTGATCCATTCATTATCC	1170	1341	ACGCCATAGAATAAGTGATTGGCATGTAGTGAGAAGTATTTCAGAAAAAATAGGTGACTTGCCAGAATATGAAGCGATGAGAACCAATTTGGTTACTGTAATATATGATTCTTTAAACGACAATGAGTTTGAGGCAAGGTGGAAGAACTGGATTGATAGATTTAGCCTTCAGGATAATGAATGGATCACC	190
ZmFAR04	ZmFAR04.1	TTCGCGGAGAACAGCGCGTCAGCGCCTACGGCTTCTGCTTGTCTCTCCCGTTCCACTCCAAACCCTAGGGGCGAATCTCCGGCTAATCGGCGGCGGGCGCAGCCACGCTGTCTGTGCAGGGCTTGTGCGGCCTTAGGACGCAGGGGCGTTGCTTGGGGCTCCCGGTGGGTGGCTACGAAGGGCTGTGGCGGCCCGCGGCCAGGGGCAAGTCGGCAGCGGCAAGCAACCGGGGTGCTGGGCGTGGGTGGGCTGCTGGGACGCCTGCGGCAGCGGTAAAAAGTCGAGCCTCGACCGTCCTGAGGCAGGAGCAGAGCAGCTGAGCTGGTTTGGTACTCTGTTGATTCTCCATTGGAGACACTAGGTGTGCCAATTTTGATGGAAGGTACTACCATTTCTATT…	GCATGATAATTTGCATATAAATG	GCCTTCTTGATCTACTTC	1023	1177	GCATGATAATTTGCATATAAATGAAGATGGTACAGAATGCCACAGCCAACTTAGCATCCGTAGTTACACACTGCTTGAACCAAAGGAATGTGAGGCCCTTGTTGGATATTTCAAGCGCAGAACAAATGAACAATGTATGTTCTATTGGGATGTAGAAGTAGATCAAGAAGGC	172
	ZmFAR04.2	GTCCGGCCTCCAGACATCAGGCAGCTCTCCCGAGCATGACGCTGTCTCTGTTCACAACTCTTCCGAGCACGCCGCCGTCAGTCCTTTGTCATCATCATCAGCTCAGATCTAGCAGCTTCGCCTTCTCAGTGATGGAAGGTACTACCATTTCTATTGAGATTGATGGGGAGGCCATCTGTCTTGACAGTGTCGGAGATAATGAACAAGAAGCTGCGGAGAATGGAGAAATGCACCAAACAATTTACACTGATGAAAATGGGGAACAAGTAGCCTTTGACAACCAAGAACAGGGGAGGGAGGAAGATCTGGCAGGAAATGGAGAAGAGGATAGGGACCATAATTCTATCATTCCAAGCCGTGAGGAGTTGACTGAAGAATTAAGAAATAAAGTCGCATATA…	GCATGATAATTTGCATATAAATG	GCCTTCTTGATCTACTTC	779	933	GCATGATAATTTGCATATAAATGAAGATGGTACAGAATGCCACAGCCAACTTAGCATCCGTAGTTACACACTGCTTGAACCAAAGGAATGTGAGGCCCTTGTTGGATATTTCAAGCGCAGAACAAATGAACAATGTATGTTCTATTGGGATGTAGAAGTAGATCAAGAAGGC	172
ZmFAR05	ZmFAR05.1	GCGAAAGTAACGCAAAGGAGCCGCTGTCGGTAGCAGCCGCCGCCGCTGGTAGAGCTTAAACAGCCTCAAGGATCCAGAGGGTTCTTGGCCCCCATTTCCGCAATTGTTGCCACCTGCTTTTAGTTCCCATTTCCTCAATTGGGGCCATCTGCTTTTAGTTCCTCTTCTTCACTCGCGGAGTTATCAAAGCTTCAGATTTCTTGCTTCTCCGCGGCAGTTTGCTAGGGGTCGGAGTGCCGGAGCCAGAGCCACGCGGGAGTTTGAGCTGGATTGGTTCTTCAATTGAGCGTGGCGGCCGGCGTCAGGTAGAAGTTTCCATGGTTCTTGGTTTGTTGTTGGAGTGTAGGAGATAACACGGGGAAGGAGATTGCGGGAGGGTAACGGAGGTCGGGGAGCTGG…	GTCTCCAAACTCATCCTA	CCCTAAATCATTATACCTCAC	1272	1434	GTCTCCAAACTCATCCTAGAGCATACCCATGAGCTGAAACCAGCACCAGCAAGTAGAGTTCACTGTGTTCGCTCGCAAGGTGAGGTACTTGTCATTGCAAATAACTTTTCTGACACTCGTAATCTCCTTCTGAATGGCCAAGATTCTCAGCATCCAAGAGAGGTGAGGTATAATGATTTAGGG	183
ZmFAR06	ZmFAR06.1	CTGACTCGGGTGCCCCTTCCCCATGTCGCACGTCGAGCCCGCCGCCGCCGGAGTGGACCAAGTCGGCGAGGGGACGGTCGTGCCGCACGACAACGGTGTCAGCGGCACCGGGGGTGACGTGGCCACCACGGAAGCGCAAGTGGCTGTTGCCGTTTCCACCTCCGGCGACGAGAGGCGGGGGGATTACGGCGATGATGCAGAGAACGAGGAGGAGGAGGAGGCCGCAACGGTGCAGGGCAGCAAGGAGGGCACTGACGAGCTGCTCCGGAAGGTGGTGTGCAGCGAAGAGGCCGCCTACAAGCTCTACTGCGATTACGGCCACCGCATGGGGTTCAGCATCCGGAAAGGGAAGCAGTCCTACTTCACCGGCACCAAGCGGATACGCACCAAGGACTACTT…	GGAGAATCAGAAGCAAGA	ATCCCAGTAAAACATACCA	628	745	GGAGAATCAGAAGCAAGATTTGCTCCTCGGCTACGGTGCTGCGACAAAGACACTGACTATAGGAACTGGGGATGTGCAGAGCCTTGTGAGCCATCTGAAAAGCAGGGCAAATGAAGATGGTATGTTTTACTGGGAT	136
ZmFAR07	ZmFAR07.1	CCACGCCGCCGTCCTCCGCACCGTCCACGCCGCCGTCCTCCGACCACCGCGACTCTGCCGCAGCCGCCCTCTGCACCGTCCTCGCCGCGCACCACCGCGACTCTGACCGTGGCCCGCAGTCCTGCCTCGCTGCCAGTACTGAGCCCGCAGGCGGCGCCCGCAGCCGAGCCGGAGGTCGCCAGCGCCGCCAGAAGACTTGCTTCGAGGGATTCCCTACGGGCTCAAGGTCAATCAGGTGTGGTCGCAGTTTTCCATTTTTAGGGTTCAGCTAAACTGGCCCCCCATGTCCCATGGTGTGCCCGCCCCCATGTTAGAAGAGTTGGCGAGGGAGGCAACACTCGCCGATGTGTCTATTCTTGTAGATGGGAATGACGCAGAGCTACATGTACATGGCAATGG…	GCAGGGATGTCTATTTCA	CAGTCAATGGAGACCTATG	1688	1844	GCAGGGATGTCTATTTCACAGCGAGGGGAGTCTATTTCCTCGTACTATGATGGGTTTGTGTACCCAAAAACTTCTTTGAAGCAATTTTTTAGTAAATATGAGATGATATTAGAGAACAAATACAAAAAGGAGTGGCAAGCAGATGAAGAATCTTCCCATAGGTCTCCATTGACTG	175
	ZmFAR07.2	TATGGTCTGAATCTGCTGGTCCTCTTCTTCAGGGCTCAAGGTCAATCAGGTGTGGTCGCAGTTTTCCATTTTTAGGGTTCAGCTAAACTGGCCCCCCATGTCCCATGGTGTGCCCGCCCCCATGTTAGAAGAGTTGGCGAGGGAGGCAACACTCGCCGATGTGTCTATTCTTGTAGATGGGAATGACGCAGAGCTACATGTACATGGCAATGGCGCAGAGGTACATGATAATGGCACAGAGTTACATGGCAATGGTGCAGTGCTGAAAAGAGTTGAAATGCCCCAGGTTAGAGAGGTGTATGATTTGGGAGCGATTTCAGCCAAGGAGGTGCCGCTGCATGAGGGCAAGGAGGTGATACTTGTGGATGATAATGACAGCGGGCAGGAAGATGATGCAGA…	GCAGGGATGTCTATTTCA	CAGTCAATGGAGACCTATG	1517	1673	GCAGGGATGTCTATTTCACAGCGAGGGGAGTCTATTTCCTCGTACTATGATGGGTTTGTGTACCCAAAAACTTCTTTGAAGCAATTTTTTAGTAAATATGAGATGATATTAGAGAACAAATACAAAAAGGAGTGGCAAGCAGATGAAGAATCTTCCCATAGGTCTCCATTGACTG	175
ZmFAR08	ZmFAR08.1	ATGGAGGTGGAGGAACCGCTCCCAACGTCCAAGAACCCCCGCCGTGCTCGGCGCCGGGACCTCAACGCACTGGATCCCACATTGGAGGAGTCCGACGGGGAGGATATTGGTGTTCCGGAAGTTGGTATGGTGTTCAATAATCACACAGAAGTCAACCGATTCTACCGCCGGTATGCCCGCCGTGTTGGCTTTGGTGTCTCAGTAAGGAGGTCTTCGTTCTCACGAGAAGGGACCTGCTTATATCTGGAGCTTATGTGCTGCAAAGGAGGGAGGCCACGTTATGAGCCGAAGTTTCGGAAAAGGGCTTCATCGACCACTAACTGCCCAGCCAAAGTACGAGTGAAGTTGTGGGGAGATAAATTGTTGCATATAGAGTTGGCGATCCTTGATCATAATCAC…	ACCAGCTAATCTCCAACA	CTCCTTATCGCCACACAG	2178	2334	ACCAGCTAATCTCCAACAATTTGTAGGCAATCAAACAGCATTTCGGCCAAGCATTGTGTACATGGTACCGCTAGAGCTAGGAGATTGGGAGGAGCAAAGGAGGTCACAAGGGAGCATGCTTGTTGGTGATGTGAGGAAGACGAGTGGTGGTGTGGGCTGTGTGGCGATAAGGAG	174
ZmFAR09	ZmFAR09.1	ATGACCACGTCGCAGACCAACTCGGTCGCCCCCGTGGGCCGTGGGAGGCTCAACCGCACACATTAACCCACACCGGCCGCCTCCGCAGGCGATCCCTCCACCCCACAGGTTCCCTTCTCCCTCCTCCTTCCTCCAAACCCTGGCGCAAACCCTAATGTCCACCGCCGGGGACCCTTCCCGCCTCTCCGGCGAGTCCTCGCCGTCGTCCTCCACGTCCTCCGGCTCCTCCTCCCACTCCTCTGGCGCCGCCGATGCCGCCGCCACCAACCTCGCCCTGACAGCACCAACCTCCGCCCTCGCCGATGACACAGACGCCGATGCCCCCACCTCCCCGCGCGTGGGGACGTACTTTGAGACCGAGGACGACGCGTACGAGTTCTACAAGGCCTACGCGGCCCG…	CCCACAAACTATTTTGATTG	AGTGCCTCTTTGAATTATG	1573	1673	CCCACAAACTATTTTGATTGATGAACGTCCTGAGTGTGCCATTGCAGCAGCAGAGGTGTGGCCTGGCACCAATCACTGCACAGGGGTGTGGCATATCTACCATAATTCAAAGAGGCACT	119
	ZmFAR09.2	ATGACCACGTCGCAGACCAACTCGGTCGCCCCCGTGGGCCGTGGGAGGCTCAACCGCACACATTAACCCACACCGGCCGCCTCCGCAGGCGATCCCTCCACCCCACAGGTTCCCTTCTCCCTCCTCCTTCCTCCAAACCCTGGCGCAAACCCTAATGTCCACCGCCGGGGACCCTTCCCGCCTCTCCGGCGAGTCCTCGCCGTCGTCCTCCACGTCCTCCGGCTCCTCCTCCCACTCCTCTGGCGCCGCCGATGCCGCCGCCACCAACCTCGCCCTGACAGCACCAACCTCCGCCCTCGCCGATGACACAGACGCCGATGCCCCCACCTCCCCGCGCGTGGGGACGTACTTTGAGACCGAGGACGACGCGTACGAGTTCTACAAGGCCTACGCGGCCCG…	CCCACAAACTATTTTGATTG	AGTGCCTCTTTGAATTATG	1573	1673	CCCACAAACTATTTTGATTGATGAACGTCCTGAGTGTGCCATTGCAGCAGCAGAGGTGTGGCCTGGCACCAATCACTGCACAGGGGTGTGGCATATCTACCATAATTCAAAGAGGCACT	119
ZmFAR10	ZmFAR10.1	GTGTGGAACCACTTCTGATGCTGTCTTTGTAAATATTGATGGAGCTAGCTGAGTAGAAATGGACTGCAGTCAAGATCCCCAAGAAGAAAGCCATCAAAGAAGGGAGAATGGTGAAGAAGCAGAAAAGACGGCTGACTATGGAAATGCTTTGAGTCGTAAGGAGGTAACAGAAGAGCTTCTTGGTTGTGTGGTTCATAGTGAGGAAGAGGCGTACAGGTTGTACTGTGATTATGGGCATCGAATCGGTTTTAGCGTGCGGAAGGGCAAACAGTCTTACTTTATTGGTACCAAGAATATTCGAACAAAGGATTACTACTGCTCAAAGGAAGGGCTTAAATACGATGAGCCTGTTACAGAAGCAAATTTTAATCGACCAGACACAAGAACTAATTGCAAAGC…	GGCAAATCAGGTGTTATAG	CCTCAATTACTGTTATACTCTG	527	659	GGCAAATCAGGTGTTATAGATCCATTAGCATCTACAGAGGCACATCCAATTAATGGTTTCTCTGATATGACAGGTGATATAGTTGAGAATTCAGGGTATACTATAAGGGAATGTTACAATCAAGTGGGCATGCAGAGTATAACAGTAATTGAGG	154
	ZmFAR10.2	ATGGACTGCAGTCAAGATCCCCAAGAAGAAAGCCATCAAAGAAGGGAGAATGGTGAAGAAGCAGAAAAGACGGCTGACTATGGAAATGCTTTGAGTCGTAAGGAGGTAACAGAAGAGCTTCTTGGTTGTGTGGTTCATAGTGAGGAAGAGGCGTACAGGTTGTACTGTGATTATGGGCATCGAATCGGTTTTAGCGTGCGGAAGGGCAAACAGTCTTACTTTATTGGTACCAAGAATATTCGAACAAAGGATTACTACTGCTCAAAGGAAGGGCTTAAATACGATGAGCCTGTTACAGAAGCAAATTTTAATCGACCAGACACAAGAACTAATTGCAAAGCAATGATCCGCTTTAGAGTTGACGAGAAGGGGCGGTGGACAGTTATACGCTTTGTTCCT…	GGCAAATCAGGTGTTATAG	CCTCAATTACTGTTATACTCTG	469	601	GGCAAATCAGGTGTTATAGATCCATTAGCATCTACAGAGGCACATCCAATTAATGGTTTCTCTGATATGACAGGTGATATAGTTGAGAATTCAGGGTATACTATAAGGGAATGTTACAATCAAGTGGGCATGCAGAGTATAACAGTAATTGAGG	154
	ZmFAR10.3	ATGGACTGCAGTCAAGATCCCCAAGAAGAAAGCCATCAAAGAAGGGAGAATGGTGAAGAAGCAGAAAAGACGGCTGACTATGGAAATGCTTTGAGTCGTAAGGAGGTAACAGAAGAGCTTCTTGGTTGTGTGGTTCATAGTGAGGAAGAGGCGTACAGGTTGTACTGTGATTATGGGCATCGAATCGGTTTTAGCGTGCGGAAGGGCAAACAGTCTTACTTTATTGGTACCAAGAATATTCGAACAAAGGATTACTACTGCTCAAAGGAAGGGCTTAAATACGATGAGCCTGTTACAGAAGCAAATTTTAATCGACCAGACACAAGAACTAATTGCAAAGCAATGATCCGCTTTAGAGTTGACGAGAAGGGGCGGTGGACAGTTATACGCTTTGTTCCT…	GGCAAATCAGGTGTTATAG	CCTCAATTACTGTTATACTCTG	469	601	GGCAAATCAGGTGTTATAGATCCATTAGCATCTACAGAGGCACATCCAATTAATGGTTTCTCTGATATGACAGGTGATATAGTTGAGAATTCAGGGTATACTATAAGGGAATGTTACAATCAAGTGGGCATGCAGAGTATAACAGTAATTGAGG	154
ZmFAR11	ZmFAR11.1	ATGGCGGGGTGGCTGGCGCTAGACGTCGCCGCGGAGGCAGAGGCGAACGAGAATGAGGCCACGACGGAGGATGCGAATGCGCAGAGGATCGGTCTCGAACTCTCAATTGTCCCTAGAGGGCTTGGGTTCCGTGTTGAGGGCGTTCAAATTACTACCAAAAAATTGGGAGTTCAAGACACCCTGATGCCATCAGCACCTGGGGAGAAGGATCCACAAGTTATACCGAGGCCTGCGACGGGGCCTCCTCTGGTGCAGACTCTCACGCCTGTCAATGCAACAGGAAGTCCTGCCATAGACCCGAGGCTGGCGCAGCCGTCTTGGCCTGGCCATGTAGTACTCCTGCGCCCTTGTGCAGCTTGGCCTCCTCATTTGCCAGTCCCGTTGCTGCTTCCGCACCAA…	ACAGGTGTGAATCATCATA	AGGCAACAGATCTATCAG	1561	1697	ACAGGTGTGAATCATCATAAGCAGACAGTTATCTTTGGTGCTGCAATTATATATGATGAAAGTAAAGAAGCTTTCCAATGGTTATTAGATACTTTCAAGATGGCAATGAACGGAACACATCCCAAGACATTGTTAACTGATAGATCTGTTGCCT	154
	ZmFAR11.2	CGCCGTCCTCTTCTTTGCCCGTCGGCCGGCGCCGCCGCAGAAACCAGCCACCCGAGTGAGCTCTTCCAGTCGTACTTGTATTAATCGGCCCACTGTCCGGCTACTGGTATTAGGTTCGTGTTGACTGGAGATTCAGAATTCATTTTTGTTTGTTGTGACAGCTGGTGATCCATCTCGTGCTCAAGGATCGGTCTCGAACTCTCAATTGTCCCTAGAGGGCTTGGGTTCCGTGTTGAGGGCGTTCAAATTACTACCAAAAAATTGGGAGTTCAAGACACCCTGATGCCATCAGCACCTGGGGAGAAGGATCCACAAGTTATACCGAGGCCTGCGACGGGGCCTCCTCTGGTGCAGACTCTCACGCCTGTCAATGCAACAGGAAGTCCTGCCATAGACCCG…	ACAGGTGTGAATCATCATA	AGGCAACAGATCTATCAG	1672	1808	ACAGGTGTGAATCATCATAAGCAGACAGTTATCTTTGGTGCTGCAATTATATATGATGAAAGTAAAGAAGCTTTCCAATGGTTATTAGATACTTTCAAGATGGCAATGAACGGAACACATCCCAAGACATTGTTAACTGATAGATCTGTTGCCT	154
ZmFAR12	ZmFAR12.1	CAGCGGATCCCGCTGACTCCTCCGCTCCTACTCCCCTGCGTCTGCTCGTCGTCTCCCCGCTCCAAACCCTAACTCGAAGCCGGAACGACCGACAAAATTCGGGAAAATCGCTCACAATTTCGCTCCAAACTACTTCCTGGACGGTGATGCGATGATGCACATGCTGGTAGCCCCGGATAGGGGCGGAGGGGAGCTGCAGCCGTACGTAGCGCCGCCCGCAGAGCAGGAGCTGGAGCTCCTCCGCGACAACGCCGATGACGGCCTCGAGGGCCACGTGCGATGCCTAAGGTGTGGAATATCCGGCAATGCGACGCCCCATATGCGCCGGGGGCCTGATGGCCCAAGAACTCTTTGCAATGCGTGTGGCATTGCTTACAGGAAGGGGAAAATGAGAAGAAT…	TGGACTCTGTGTTATTCA	ACCCATAAACTCAAACTTC	1878	2008	TGGACTCTGTGTTATTCAGTTGTGGGGAGGCTGGGACGACATCTGAGTACAAGGTTGCTTCATCTGAGAAACCCAAGGAGCACTTTGTTCGGTTCGATTCAAGTGATTGCTCCTGTCTGTGCACTTGTAGGAAGTTTGAGTTTATGGGT	149
	ZmFAR12.2	CAGCGGATCCCGCTGACTCCTCCGCTCCTACTCCCCTGCGTCTGCTCGTCGTCTCCCCGCTCCAAACCCTAACTCGAAGCCGGAACGACCGACAAAATTCGGGAAAATCGCTCACAATTTCGCTCCAAACTACTTCCTGGACGGTGATGCGATGATGCACATGCTGGTAGCCCCGGATAGGGGCGGAGGGGAGCTGCAGCCGTACGTAGCGCCGCCCGCAGAGCAGGAGCTGGAGCTCCTCCGCGACAACGCCGATGACGGCCTCGAGGGCCACGTGCGATGCCTAAGGTGTGGAATATCCCGGCAATGCGACGCCCCATATGCGCCGGGGGCCTGATGGCCCAAGAACTCTTTGCAATGCGTGTGGCATTGCTTACAGGAAGGGGAAAATGAGAAGAA…	TGGACTCTGTGTTATTCA	ACCCATAAACTCAAACTTC	1879	2009	TGGACTCTGTGTTATTCAGTTGTGGGGAGGCTGGGACGACATCTGAGTACAAGGTTGCTTCATCTGAGAAACCCAAGGAGCACTTTGTTCGGTTCGATTCAAGTGATTGCTCCTGTCTGTGCACTTGTAGGAAGTTTGAGTTTATGGGT	149
ZmFAR13	ZmFAR13.1	CGCTCCCCGTTGACTGCCACTCTCCTTGCGTGCACTATCGTCCCGGCGACGACTCCGCTGCCGTCGCCGCCTACGCCAGGTTCCGAAGTCTTCGTGAGCCCCTTCTCCTACAACGAGCACTCACACCAATCACCAGTGATTTATTGCGCATGAGGACTGCATCTCCCCTTGAAATTTGAGGCTTTGGAAAACTGCTGAATGGAGTATTCCTCAAGTGAAGACGAGGGATTGGTTGGAGATTTTATCGACGCTGAGGATAATACGTTCACTAAGAATATTGACCAAGGAACTGGCGTGATGGCTTCCCAGATCCATGGTGATGATCCCTCGGTGGGATCCATGCCACCTGTTATTGGAAATGAGCTGCTGATGGCAGCTGATGTATTGGCCAAAAATGAC…	TCCTGAACAGTTTCTGAAA	GATCCATCCTGAACCTTG	1638	1758	TCCTGAACAGTTTCTGAAAACCGACATGGTCTTGGAAAAACAAGCGAGGAGTATCTACACCAGAGCTGCATTTGAAACATTCCAGCTGGAATTGGTTGAAGCAATGCAACATTATGCCGTCAAGGTTCAGGATGGATC	138
ZmFAR14	ZmFAR14.1	ATGGCTCCTCTTCAGACTTCAGCTTCTACTACCTCTGTCACTGCTTCATCAGGTGTGACAGCTGAAAGCCTACTTGACCTTTCTCCAGATACAGTCTTCTCCATCCATGCAGATGCAGAAGATGGGTCTCCTCGTAAAGGAGGAGGTTCCTTGGCCCCACCTTTCCCATCTCCATGTACTTTGCGGACTACGCTTCTACGATATGCTGATCTACTCAATCCACCGAAGAAGGCTGCTTTGCTTGCTTTAGCTTCTCATGCATCTGATCCAGCTGAAGCTGAACGACTTAGGTTCTTGGCCTCTCCTGCTGGAAAGGGGGGAAGGTTTGCCTCCTCAATCATGTGGGAGCCTGTGGCGCTGGGTCTGCTCTTTTATCGAACTGTCCTGTTCATGCCGGTG…	TACGCTTCTACGATATGC	GGATCAGATGCATGAGAA	189	252	TACGCTTCTACGATATGCTGATCTACTCAATCCACCGAAGAAGGCTGCTTTGCTTGCTTTAGCTTCTCATGCATCTGATCC	81
	ZmFAR14.2	ATGGCTCCTCTTCAGACTTCAGCTTCTACTACCTCTGTCACTGCTTCATCAGGTGTGACAGCTGAAAGCCTACTTGACCTTTCTCCAGATACAGTCTTCTCCATCCATGCAGATGCAGAAGATGGGTCTCCTCGTAAAGGAGGAGGTTCCTTGGCCCCACCTTTCCCATCTCCATGTACTTTGCGGACTACGCTTCTACGATATGCTGATCTACTCAATCCACCGAAGAAGGCTGCTTTGCTTGCTTTAGCTTCTCATGCATCTGATCCAGCTGAAGCTGAACGACTTAGGTTCTTGGCCTCTCCTGCTGGAAAGGGGGGAAGGTTTGCCTCCTCAATCATGTGGGAGCCTGTGGCGCTGGGTCTGCTCTTTTATCGAACTGTCCTGTTCATGCCGGTG…	TACGCTTCTACGATATGC	GGATCAGATGCATGAGAA	189	252	TACGCTTCTACGATATGCTGATCTACTCAATCCACCGAAGAAGGCTGCTTTGCTTGCTTTAGCTTCTCATGCATCTGATCC	81
ACT1	ACT1.1	CGTCACGCTCGCAGCACCGGCCGTTTTCTACGGGCGGTGCAGTGGACGGGAGTAGTACCCTTTCTTTCTCTTCGAAGAAAATGCGGCGGCGTGTGGTATAAACCCCGCCCGTCACGCCGGGCCGTCCGTGCGTTTCCTTTTGTCTTCGCTTGCTTCCTTTCGAAAGTCCTTGCGTCACACTCGCCGATCGATCGAGTCTCTCCGGATTCCAGAGAGGCCCAACTGCCGAAGCCATCGATCGCCGCCACCTCTTCGAGCAGAATAGTTGAGAATGGCTGACGAGGATATCCAGCCTATCGTATGTGACAATGGCACTGGAATGGTCAAGGCCGGTTTCGCTGGTGATGATGCGCCAAGAGCTGTCTTCCCCAGCATTGTGGGAAGACCACGCCACACCGG…	GGGATTGCCGATCGTATGAG	GAGCCACCGATCCAGACACT	1196	1286	ACTTGCTTAAGTTTAAGAGACATTTGAAGAACTCCCCTTTTACGATAAATCCACCTCAAATTTGTGAGTCTGAGGGACAACAGAGCAACTCAGCTCTTGTACATTCAAGC	110
	ACT1.2	CGTCACGCTCGCAGCACCGGCCGTTTTCTACGGGCGGTGCAGTGGACGGGAGTAGTACCCTTTCTTTCTCTTCGAAGAAAATGCGGCGGCGTGTGGTATAAACCCCGCCCGTCACGCCGGGCCGTCCGTGCGTTTCCTTTTGTCTTCGCTTGCTTCCTTTCGAAAGTCCTTGCGTCACACTCGCCGATCGATCGAGTCTCTCCGGATTCCAGAGAGGCCCAACTGCCGAAGCCATCGATCGCCGCCACCTCTTCGAGCAGTTGAGAATGGCTGACGAGGATATCCAGCCTATCGTATGTGACAATGGCACTGGAATGGTCAAGGCCGGTTTCGCTGGTGATGATGCGCCAAGAGCTGTCTTCCCCAGCATTGTGGGAAGACCACGCCACACCGGTGTCA…	GGGATTGCCGATCGTATGAG	GAGCCACCGATCCAGACACT	1196	1286	GGGATTGCCGATCGTATGAGCAAGGAGATCACGTCCCTGGCTCCTAGCAGCATGAAGGTTAAAGTGATTGCGCCACCTGAAAGGAAGTACAGTGTCTGGATCGGTGGCTC	110
	ACT1.3	ACCATGAGCAGAAAGTGTATTTTGATTCCCCGACCAGGCTGCATAACTGCATTTTTCTATGAATGTGTACTGAACGCTGAACTTTGGTCTGTTACAGAATAGTTGAGAATGGCTGACGAGGATATCCAGCCTATCGTATGTGACAATGGCACTGGAATGGTCAAGGCCGGTTTCGCTGGTGATGATGCGCCAAGAGCTGTCTTCCCCAGCATTGTGGGAAGACCACGCCACACCGGTGTCATGGTCGGCATGGGCCAAAAGGATGCCTACGTAGGTGATGAGGCTCAGGCCAAGAGAGGCATCCTGACACTGAAGTACCCGATTGAGCATGGCATTGTCAACAACTGGGATGACATGGAGAAAATCTGGCATCACACCTTCTACAACGAGCTCCGTGTT…	GGGATTGCCGATCGTATGAG	GAGCCACCGATCCAGACACT	1191	1281	GGGATTGCCGATCGTATGAGCAAGGAGATCACGTCCCTGGCTCCTAGCAGCATGAAGGTTAAAGTGATTGCGCCACCTGAAAGGAAGTACAGTGTCTGGATCGGTGGCTC	110

## Sheet: Data analysis (fig. 7)
At the early seedling stage, the expression patterns of ZmFARs in root system and mesocotyls under water deficit.
ID	Tissues	Control_1	Control_2	Control_3	Control_mean	Control_SD	Water deficit(WD)_1	Water deficit(WD)_2	Water deficit(WD)_3	WD_mean	WD_SD
ZmFAR01	Primary Root (PR)	0.361411	0.304791	0.35857	0.341591	0.0319013	0.1189	0.0803963	0.102835	0.10071	0.0193397
ZmFAR01	Seminal Root(SR)	0.0291783	0.0238731	0.0280746	0.027042	0.00279926	0.00278756	0.00197544	0.00218082	0.00231461	0.000422267
ZmFAR01	Lateral Root(LR)	0.647229	0.529551	0.598967	0.591916	0.0591551	0.149326	0.0985157	0.147743	0.131862	0.0288892
ZmFAR01	Mesocotyl(Me)	0.27665	0.338128	0.313202	0.309327	0.0309216	0.0618545	0.061144	0.0611527	0.0613837	0.000407689
ZmFAR02	Primary Root (PR)	1.30913	1.0802	1.24351	1.21095	0.117889	1.401	0.761529	1.03003	1.06419	0.3211
ZmFAR02	Seminal Root(SR)	0.559628	0.68399	0.560312	0.60131	0.0716036	0.839978	0.636649	0.838807	0.771812	0.117056
ZmFAR02	Lateral Root(LR)	0.41453	0.528869	0.482703	0.475367	0.0575218	0.496132	0.408875	0.421912	0.442306	0.0470679
ZmFAR02	Mesocotyl(Me)	0.835841	0.932695	0.857911	0.875483	0.0507613	0.647905	0.504156	0.520999	0.557687	0.0785839
ZmFAR03	Primary Root (PR)	1.96132	2.38605	2.36187	2.23641	0.238547	1.91316	1.55806	1.77006	1.7471	0.178664
ZmFAR03	Seminal Root(SR)	1.37635	1.1261	1.23101	1.24449	0.125666	1.33682	0.732706	0.79902	0.956181	0.331303
ZmFAR03	Lateral Root(LR)	0.971794	0.795104	0.926278	0.897725	0.0917401	0.825882	0.462526	0.601851	0.630086	0.183316
ZmFAR03	Mesocotyl(Me)	0.515131	0.629604	0.616896	0.58721	0.0627453	0.392111	0.333684	0.373593	0.366463	0.0298591
ZmFAR04	Primary Root (PR)	1.12745	1.37799	1.21305	1.2395	0.127349	0.972728	0.811847	0.878017	0.887531	0.0808615
ZmFAR04	Seminal Root(SR)	1.65499	1.39045	1.63545	1.5603	0.147418	1.34927	0.784722	1.23445	1.12281	0.298371
ZmFAR04	Lateral Root(LR)	0.249793	0.327525	0.300855	0.292724	0.0394986	0.335636	0.277954	0.304488	0.306026	0.0288717
ZmFAR04	Mesocotyl(Me)	0.650785	0.75096	0.66383	0.688525	0.0544621	0.410665	0.339536	0.351884	0.367362	0.0380065
ZmFAR05	Primary Root (PR)	0.580468	0.474929	0.492507	0.515968	0.0565462	0.549954	0.302662	0.408318	0.420311	0.124081
ZmFAR05	Seminal Root(SR)	0.31579	0.385966	0.321708	0.341155	0.0389201	0.276561	0.230271	0.253099	0.25331	0.0231454
ZmFAR05	Lateral Root(LR)	0.291879	0.23881	0.271148	0.267279	0.0267452	0.39408	0.203942	0.242698	0.28024	0.100474
ZmFAR05	Mesocotyl(Me)	0.322027	0.263476	0.281203	0.288902	0.0300248	0.165063	0.099451	0.104449	0.122988	0.036524
ZmFAR06	Primary Root (PR)	1.11696	0.913873	1.05791	1.02958	0.104464	1.29026	0.68666	0.800764	0.925893	0.320664
ZmFAR06	Seminal Root(SR)	0.744356	0.609019	0.692111	0.681828	0.0682521	1.13986	0.576134	0.749376	0.821788	0.288752
ZmFAR06	Lateral Root(LR)	1.17455	0.997358	1.03508	1.06899	0.093338	1.08955	0.625972	0.686669	0.80073	0.251959
ZmFAR06	Mesocotyl(Me)	0.369814	0.474218	0.450279	0.431437	0.0546925	0.247213	0.225953	0.237628	0.236931	0.0106469
ZmFAR07	Primary Root (PR)	0.756481	0.935699	0.790513	0.827564	0.0951808	0.632215	0.536794	0.570593	0.579867	0.0483821
ZmFAR07	Seminal Root(SR)	0.496697	0.607074	0.50358	0.535784	0.061835	0.493191	0.402334	0.429606	0.44171	0.0466225
ZmFAR07	Lateral Root(LR)	0.273053	0.333731	0.320265	0.309016	0.0318648	0.30016	0.240687	0.268752	0.269866	0.0297523
ZmFAR07	Mesocotyl(Me)	0.159339	0.194748	0.193782	0.182623	0.0201701	0.133003	0.111586	0.113793	0.119461	0.0117801
ZmFAR08	Primary Root (PR)	1.03362	0.836601	1.00677	0.958999	0.106847	0.954286	0.521333	0.740559	0.738726	0.216483
ZmFAR08	Seminal Root(SR)	0.723702	0.862303	0.732723	0.772909	0.0775482	0.721132	0.573167	0.63062	0.64164	0.0745952
ZmFAR08	Lateral Root(LR)	0.634042	0.730495	0.706821	0.690453	0.050267	0.706784	0.532531	0.697588	0.645634	0.098058
ZmFAR08	Mesocotyl(Me)	0.339319	0.414723	0.353238	0.369093	0.0401246	0.241184	0.207367	0.222482	0.223678	0.0169403
ZmFAR09	Primary Root (PR)	0.485716	0.582542	0.530105	0.532788	0.0484686	0.426264	0.348143	0.374206	0.382871	0.0397745
ZmFAR09	Seminal Root(SR)	0.109034	0.133264	0.117712	0.120003	0.0122763	0.166787	0.125958	0.147349	0.146698	0.0204223
ZmFAR09	Lateral Root(LR)	0.327433	0.2679	0.291392	0.295575	0.0299863	0.324621	0.17732	0.292081	0.264674	0.0773803
ZmFAR09	Mesocotyl(Me)	0.117347	0.143424	0.129875	0.130216	0.0130419	0.136406	0.108323	0.126094	0.123608	0.0142052
ZmFAR10	Primary Root (PR)	1.03846	1.247	1.18535	1.15694	0.107137	0.991923	0.800121	0.94207	0.911371	0.0995177
ZmFAR10	Seminal Root(SR)	0.38549	0.471154	0.466801	0.441148	0.0482507	0.564845	0.43007	0.509083	0.501333	0.0677209
ZmFAR10	Lateral Root(LR)	0.476405	0.582273	0.557669	0.538782	0.0554033	0.451912	0.371449	0.40594	0.409767	0.0403675
ZmFAR10	Mesocotyl(Me)	0.186204	0.249805	0.234935	0.223648	0.0332688	0.174959	0.158291	0.159633	0.164294	0.00926024
ZmFAR11	Primary Root (PR)	1.06582	0.89022	0.935167	0.963737	0.0912219	1.20846	0.657207	1.07246	0.979375	0.287173
ZmFAR11	Seminal Root(SR)	0.475867	0.389345	0.426013	0.430408	0.0434278	0.808973	0.400677	0.497137	0.568929	0.213405
ZmFAR11	Lateral Root(LR)	0.441384	0.361133	0.384345	0.395621	0.041297	0.705207	0.353545	0.456759	0.50517	0.18076
ZmFAR11	Mesocotyl(Me)	0.560892	0.64109	0.60761	0.603197	0.0402808	0.502072	0.389918	0.432476	0.441488	0.0566173
ZmFAR12	Primary Root (PR)	0.650355	0.523018	0.615299	0.596224	0.0657769	0.567508	0.310437	0.42123	0.433058	0.128943
ZmFAR12	Seminal Root(SR)	0.847062	0.747596	0.822119	0.805593	0.0517515	1.01112	0.570547	0.653088	0.744917	0.2342
ZmFAR12	Lateral Root(LR)	0.586284	0.479687	0.530227	0.532066	0.0533223	0.498737	0.27927	0.482231	0.420079	0.122224
ZmFAR12	Mesocotyl(Me)	0.263385	0.321915	0.311647	0.298982	0.0312528	0.170418	0.148545	0.151665	0.156876	0.011831
ZmFAR13	Primary Root (PR)	0.975528	1.19231	1.08815	1.08533	0.108419	0.887692	0.734588	0.811268	0.811182	0.0765519
ZmFAR13	Seminal Root(SR)	0.897774	1.03061	1.02126	0.983216	0.0741429	0.799552	0.624083	0.717728	0.713787	0.0878005
ZmFAR13	Lateral Root(LR)	0.751596	0.896395	0.789318	0.812436	0.0751167	0.835467	0.652417	0.666308	0.718064	0.101911
ZmFAR13	Mesocotyl(Me)	0.765878	0.847184	0.835852	0.816304	0.0440369	0.597062	0.460679	0.536057	0.531266	0.0683174
ZmFAR14	Primary Root (PR)	1.27392	1.55701	1.36863	1.39985	0.144107	1.19512	0.984107	1.10819	1.0958	0.106049
ZmFAR14	Seminal Root(SR)	0.860088	1.05122	0.885206	0.932171	0.103861	0.762351	0.633535	0.643863	0.679916	0.0715767
ZmFAR14	Lateral Root(LR)	0.4909	0.622212	0.519421	0.544178	0.0690675	0.419473	0.363912	0.417599	0.400328	0.0315508
ZmFAR14	Mesocotyl(Me)	0.647011	0.746347	0.733356	0.708904	0.0539935	0.476778	0.385249	0.413672	0.425233	0.0468466
ID	Tissues	Significant	p value	Control_mean	WD_mean	SE of difference	t ratio	df
ZmFAR01	Primary Root (PR)	*	2.07851e-08	0.341591	0.10071	0.0236113	10.2019	16
ZmFAR01	Seminal Root(SR)		0.31054	0.027042	0.0023146	0.0236113	1.04727	16
ZmFAR01	Lateral Root(LR)	*	1.43078e-12	0.591916	0.131862	0.0236113	19.4845	16
ZmFAR01	Mesocotyl(Me)	*	1.3855e-08	0.309327	0.0613837	0.0236113	10.501	16
ID	Tissues	Significant	p value	Control_mean	WD_mean	SE of difference	t ratio	df
ZmFAR02	Primary Root (PR)		0.207973	1.21095	1.06419	0.111844	1.31218	16
ZmFAR02	Seminal Root(SR)		0.146915	0.60131	0.771812	0.111844	1.52446	16
ZmFAR02	Lateral Root(LR)		0.771338	0.475367	0.442306	0.111844	0.2956	16
ZmFAR02	Mesocotyl(Me)	*	0.0117882	0.875483	0.557687	0.111844	2.84143	16
ID	Tissues	Significant	p value	Control_mean	WD_mean	SE of difference	t ratio	df
ZmFAR03	Primary Root (PR)	*	0.00436557	2.23641	1.7471	0.147544	3.31643	16
ZmFAR03	Seminal Root(SR)		0.068405	1.24449	0.956181	0.147544	1.95405	16
ZmFAR03	Lateral Root(LR)		0.0884802	0.897725	0.630086	0.147544	1.81397	16
ZmFAR03	Mesocotyl(Me)		0.154078	0.58721	0.366463	0.147544	1.49615	16
ID	Tissues	Significant	p value	Control_mean	WD_mean	SE of difference	t ratio	df
ZmFAR04	Primary Root (PR)	*	0.00496955	1.2395	0.887531	0.108135	3.2549	16
ZmFAR04	Seminal Root(SR)	*	0.000937433	1.5603	1.12281	0.108135	4.04575	16
ZmFAR04	Lateral Root(LR)		0.903633	0.292724	0.306026	0.108135	0.123008	16
ZmFAR04	Mesocotyl(Me)	*	0.00902619	0.688525	0.367362	0.108135	2.97003	16
ID	Tissues	Significant	p value	Control_mean	WD_mean	SE of difference	t ratio	df
ZmFAR05	Primary Root (PR)		0.0898744	0.515968	0.420311	0.0529858	1.80533	16
ZmFAR05	Seminal Root(SR)		0.116814	0.341155	0.25331	0.0529858	1.65789	16
ZmFAR05	Lateral Root(LR)		0.809867	0.267279	0.28024	0.0529858	0.244611	16
ZmFAR05	Mesocotyl(Me)	*	0.00644318	0.288902	0.122988	0.0529858	3.13129	16
ID	Tissues	Significant	p value	Control_mean	WD_mean	SE of difference	t ratio	df
ZmFAR06	Primary Root (PR)		0.504766	1.02958	0.925894	0.151952	0.682368	16
ZmFAR06	Seminal Root(SR)		0.37069	0.681828	0.821788	0.151952	0.921077	16
ZmFAR06	Lateral Root(LR)		0.0965617	1.06899	0.80073	0.151952	1.76545	16
ZmFAR06	Mesocotyl(Me)		0.218778	0.431437	0.236931	0.151952	1.28004	16
ID	Tissues	Significant	p value	Control_mean	WD_mean	SE of difference	t ratio	df
ZmFAR07	Primary Root (PR)	*	1.5599e-05	0.827564	0.579867	0.0406649	6.09118	16
ZmFAR07	Seminal Root(SR)	*	0.0343295	0.535784	0.44171	0.0406649	2.31338	16
ZmFAR07	Lateral Root(LR)		0.350002	0.309016	0.269866	0.0406649	0.962744	16
ZmFAR07	Mesocotyl(Me)		0.139922	0.182623	0.119461	0.0406649	1.55323	16
ID	Tissues	Significant	p value	Control_mean	WD_mean	SE of difference	t ratio	df
ZmFAR08	Primary Root (PR)	*	0.0180351	0.958999	0.738726	0.0836153	2.63436	16
ZmFAR08	Seminal Root(SR)		0.135996	0.772909	0.64164	0.0836153	1.56992	16
ZmFAR08	Lateral Root(LR)		0.599327	0.690453	0.645634	0.0836153	0.536007	16
ZmFAR08	Mesocotyl(Me)		0.101216	0.369093	0.223678	0.0836153	1.73911	16
ID	Tissues	Significant	p value	Control_mean	WD_mean	SE of difference	t ratio	df
ZmFAR09	Primary Root (PR)	*	0.000200629	0.532788	0.382871	0.031302	4.78937	16
ZmFAR09	Seminal Root(SR)		0.406343	0.120003	0.146698	0.031302	0.852823	16
ZmFAR09	Lateral Root(LR)		0.33824	0.295575	0.264674	0.031302	0.987199	16
ZmFAR09	Mesocotyl(Me)		0.835473	0.130216	0.123608	0.031302	0.211102	16
ID	Tissues	Significant	p value	Control_mean	WD_mean	SE of difference	t ratio	df
ZmFAR10	Primary Root (PR)	*	0.000295349	1.15694	0.911371	0.053376	4.60068	16
ZmFAR10	Seminal Root(SR)		0.276133	0.441148	0.501333	0.053376	1.12756	16
ZmFAR10	Lateral Root(LR)	*	0.0279508	0.538782	0.409767	0.053376	2.4171	16
ZmFAR10	Mesocotyl(Me)		0.282574	0.223648	0.164294	0.053376	1.11199	16
ID	Tissues	Significant	p value	Control_mean	WD_mean	SE of difference	t ratio	df
ZmFAR11	Primary Root (PR)		0.899276	0.963737	0.979374	0.121595	0.1286	16
ZmFAR11	Seminal Root(SR)		0.271391	0.430408	0.568929	0.121595	1.13919	16
ZmFAR11	Lateral Root(LR)		0.380983	0.395621	0.50517	0.121595	0.900937	16
ZmFAR11	Mesocotyl(Me)		0.202202	0.603197	0.441488	0.121595	1.32989	16
ID	Tissues	Significant	p value	Control_mean	WD_mean	SE of difference	t ratio	df
ZmFAR12	Primary Root (PR)		0.0889115	0.596224	0.433058	0.0900829	1.81128	16
ZmFAR12	Seminal Root(SR)		0.510208	0.805593	0.744917	0.0900829	0.673555	16
ZmFAR12	Lateral Root(LR)		0.231721	0.532066	0.420079	0.0900829	1.24315	16
ZmFAR12	Mesocotyl(Me)		0.134245	0.298982	0.156876	0.0900829	1.5775	16
ID	Tissues	Significant	p value	Control_mean	WD_mean	SE of difference	t ratio	df
ZmFAR13	Primary Root (PR)	*	0.000823527	1.08533	0.811182	0.0667432	4.10749	16
ZmFAR13	Seminal Root(SR)	*	0.000955232	0.983216	0.713787	0.0667432	4.03679	16
ZmFAR13	Lateral Root(LR)		0.176538	0.812436	0.718064	0.0667432	1.41395	16
ZmFAR13	Mesocotyl(Me)	*	0.000585388	0.816304	0.531266	0.0667432	4.27067	16
ID	Tissues	Significant	p value	Control_mean	WD_mean	SE of difference	t ratio	df
ZmFAR14	Primary Root (PR)	*	0.000502858	1.39985	1.0958	0.0699994	4.34361	16
ZmFAR14	Seminal Root(SR)	*	0.00238071	0.932171	0.679916	0.0699994	3.60366	16
ZmFAR14	Lateral Root(LR)		0.0565827	0.544178	0.400328	0.0699994	2.05501	16
ZmFAR14	Mesocotyl(Me)	*	0.000924275	0.708904	0.425233	0.0699994	4.05248	16

## Sheet: Data analysis (fig. 8)
The expression patterns of ZmFARs in root under different concentrations of PEG-6000 treatment.
ID	Time	Control_1	Control_2	Control_3	Control_mean	Control_SD	10%(w/v)PEG-6000_1	10%(w/v)PEG-6000_2	10%(w/v)PEG-6000_3	10%(w/v)PEG-6000_mean	10%(w/v)PEG-6000_SD	25%(w/v)PEG-6000_1	25%(w/v)PEG-6000_2	25%(w/v)PEG-6000_3	25%(w/v)PEG-6000_mean	25%(w/v)PEG-6000_SD
ZmFAR01	6h	0.174346	0.158556	0.160184	0.164362	0.00868473	0.113052	0.0760536	0.0957597	0.094955	0.0185121	0.0985519	0.0683208	0.086317	0.0843965	0.0152067
ZmFAR02	6h	0.274041	0.329383	0.305237	0.302887	0.0277459	0.286864	0.228105	0.253814	0.256261	0.0294559	0.229584	0.189292	0.206966	0.208614	0.0201961
ZmFAR03	6h	0.924813	1.10533	0.941374	0.990505	0.0997832	0.643303	0.542387	0.590472	0.592054	0.0504764	0.542666	0.46854	0.473522	0.494909	0.0414334
ZmFAR04	6h	0.165637	0.199667	0.177332	0.180878	0.0172902	0.209845	0.161851	0.208875	0.193524	0.0274338	0.185245	0.146067	0.152979	0.16143	0.0209119
ZmFAR05	6h	0.415713	0.360583	0.401958	0.392752	0.0286948	0.200647	0.133974	0.194038	0.176219	0.0367349	0.208417	0.138215	0.192112	0.179581	0.0367404
ZmFAR06	6h	0.550282	0.650345	0.598279	0.599636	0.0500452	0.436262	0.356772	0.376502	0.389846	0.0413909	0.470605	0.380353	0.392261	0.414407	0.0490325
ZmFAR07	6h	0.179415	0.146794	0.153566	0.159925	0.017215	0.173058	0.0949609	0.137631	0.135217	0.0391043	0.13465	0.0768712	0.0935312	0.101684	0.0297399
ZmFAR08	6h	0.425814	0.355212	0.386675	0.389234	0.0353708	0.389595	0.220183	0.333309	0.314362	0.0862807	0.311445	0.182971	0.306088	0.266835	0.0726772
ZmFAR09	6h	0.259179	0.302886	0.272659	0.278241	0.0223816	0.152941	0.129105	0.146766	0.142937	0.0123702	0.153972	0.129858	0.147158	0.143662	0.012431
ZmFAR10	6h	0.227104	0.194903	0.204814	0.20894	0.0164922	0.291802	0.158215	0.234369	0.228129	0.0670117	0.318409	0.169306	0.257301	0.248338	0.0749544
ZmFAR11	6h	0.439255	0.382118	0.396995	0.406123	0.0296422	0.343654	0.20997	0.306252	0.286625	0.0689693	0.322926	0.199827	0.213426	0.245393	0.0674888
ZmFAR12	6h	0.323245	0.395078	0.392206	0.370176	0.0406688	0.224415	0.193621	0.197771	0.205269	0.0167103	0.220752	0.190921	0.220194	0.210622	0.0170644
ZmFAR13	6h	0.453445	0.554211	0.533963	0.513873	0.0533022	0.242585	0.217097	0.220989	0.226891	0.0137303	0.207961	0.18988	0.207604	0.201815	0.0103378
ZmFAR14	6h	0.477459	0.572449	0.507825	0.519244	0.0485141	0.355998	0.29804	0.306379	0.320139	0.0313334	0.318087	0.270705	0.293636	0.294142	0.0236952
ZmFAR01	24h	0.14521	0.118809	0.127068	0.130362	0.0135057	0.0758175	0.0455689	0.0574336	0.0596067	0.0152409	0.0207703	0.0142914	0.0175745	0.0175454	0.00323956
ZmFAR02	24h	0.338972	0.392077	0.35661	0.362553	0.0270466	0.447519	0.328083	0.360037	0.378547	0.0618321	0.292779	0.231354	0.24441	0.256181	0.0323601
ZmFAR03	24h	0.553231	0.676171	0.597527	0.608976	0.0622647	0.439885	0.371849	0.389313	0.400349	0.0353351	0.411746	0.351587	0.404942	0.389425	0.0329446
ZmFAR04	24h	0.260141	0.295728	0.272567	0.276146	0.0180614	0.381343	0.268554	0.337009	0.328969	0.0568226	0.229654	0.177843	0.194514	0.200671	0.0264485
ZmFAR05	24h	0.214146	0.250622	0.230532	0.231767	0.0182697	0.162634	0.13261	0.162166	0.15247	0.0172008	0.112295	0.0964006	0.110225	0.106307	0.00864126
ZmFAR06	24h	0.479601	0.392401	0.438472	0.436825	0.0436235	0.488431	0.265606	0.284074	0.346037	0.123662	0.515713	0.277874	0.371216	0.388268	0.119833
ZmFAR07	24h	0.1978	0.166382	0.195675	0.186619	0.017558	0.206856	0.115008	0.140537	0.154133	0.0474095	0.12285	0.0750065	0.0750085	0.090955	0.0276218
ZmFAR08	24h	0.26691	0.326223	0.30188	0.298338	0.0298149	0.258502	0.211752	0.216532	0.228929	0.0257225	0.20905	0.177127	0.202106	0.196094	0.0167891
ZmFAR09	24h	0.178925	0.146393	0.15444	0.159919	0.0169439	0.124425	0.0718458	0.0720475	0.0894394	0.0302985	0.13696	0.0779559	0.0831604	0.0993586	0.0326672
ZmFAR10	24h	0.167343	0.20453	0.181367	0.184414	0.0187799	0.302376	0.22102	0.230764	0.251387	0.0444256	0.223489	0.17312	0.187736	0.194782	0.0259128
ZmFAR11	24h	0.217765	0.266157	0.250239	0.244721	0.0246636	0.276487	0.216151	0.273798	0.255479	0.0340856	0.205509	0.169061	0.194696	0.189756	0.0187198
ZmFAR12	24h	0.251417	0.307287	0.295152	0.284619	0.0293869	0.179571	0.154282	0.159326	0.164393	0.0133843	0.16783	0.145632	0.15978	0.157747	0.0112374
ZmFAR13	24h	0.468843	0.388144	0.444178	0.433722	0.041353	0.332938	0.194627	0.311591	0.279719	0.0744603	0.278224	0.167225	0.23772	0.227723	0.056171
ZmFAR14	24h	0.466937	0.537368	0.494918	0.499741	0.0354621	0.399199	0.314442	0.327847	0.347163	0.0455607	0.29477	0.243119	0.264586	0.267492	0.0259478
ZmFAR01	48h	0.118488	0.0969449	0.102943	0.106125	0.0111187	0.0653692	0.039	0.0506309	0.0516667	0.0132151	0.0289453	0.0189896	0.0198267	0.0225872	0.00552213
ZmFAR02	48h	0.254547	0.311113	0.255928	0.273863	0.0322671	0.25504	0.207744	0.224723	0.229169	0.0239598	0.181886	0.156261	0.174879	0.171009	0.0132437
ZmFAR03	48h	0.810132	0.662835	0.747766	0.740244	0.0739359	0.621089	0.353433	0.489247	0.487923	0.133833	0.551475	0.319432	0.460006	0.443638	0.116884
ZmFAR04	48h	0.271942	0.236135	0.252272	0.25345	0.0179329	0.344843	0.189278	0.300068	0.278063	0.0800832	0.244819	0.144956	0.227432	0.205736	0.05335
ZmFAR05	48h	0.260155	0.212854	0.253074	0.242028	0.0255118	0.120693	0.0736625	0.116576	0.103644	0.0260463	0.121063	0.0738597	0.0880048	0.0943093	0.0242252
ZmFAR06	48h	0.537014	0.439375	0.475726	0.484038	0.0493474	0.399704	0.228474	0.324885	0.317688	0.0858413	0.49323	0.272821	0.328237	0.364763	0.114655
ZmFAR07	48h	0.183786	0.15037	0.176394	0.170183	0.0175522	0.182327	0.0995829	0.144766	0.142225	0.0414303	0.111163	0.0654863	0.109122	0.095257	0.0258024
ZmFAR08	48h	0.488164	0.422134	0.467637	0.459311	0.033793	0.417818	0.248868	0.337967	0.334884	0.0845174	0.367227	0.224524	0.289782	0.293844	0.0714382
ZmFAR09	48h	0.170593	0.208502	0.183439	0.187511	0.01928	0.0945458	0.0842104	0.092908	0.0905547	0.00555504	0.112134	0.0975199	0.111526	0.10706	0.00826733
ZmFAR10	48h	0.234177	0.20069	0.23104	0.221969	0.0184946	0.371757	0.191955	0.335827	0.299846	0.0951484	0.364276	0.188978	0.344156	0.299137	0.0959295
ZmFAR11	48h	0.37516	0.320586	0.322	0.339249	0.0311084	0.337687	0.196495	0.286592	0.273591	0.0714881	0.285517	0.171645	0.216705	0.224622	0.0573475
ZmFAR12	48h	0.472565	0.409372	0.46727	0.449736	0.0350565	0.34292	0.211637	0.342847	0.299134	0.0757753	0.334855	0.207636	0.244978	0.262489	0.0653926
ZmFAR13	48h	0.530396	0.620484	0.562546	0.571142	0.045655	0.354388	0.294334	0.320419	0.323047	0.030113	0.285135	0.243906	0.272382	0.267141	0.0211087
ZmFAR14	48h	0.441354	0.522767	0.457638	0.47392	0.0430791	0.329318	0.27238	0.303919	0.301872	0.0285242	0.269703	0.229524	0.234964	0.24473	0.0217974
ID	Time	Data sets to analyze	Significant	p value	Control_mean	Test_mean	SE of difference	t ratio	df
ZmFAR01	6h	10% vs. Control	*	0.0041827	0.164362	0.094955	0.0118057	5.87912	4
ZmFAR01	24h	10% vs. Control	*	0.00383986	0.130362	0.0596067	0.0117571	6.01812	4
ZmFAR01	48h	10% vs. Control	*	0.0054642	0.106125	0.0516667	0.00997103	5.46167	4
ID	Time	Data sets to analyze	Significant	p value	Control_mean	Test_mean	SE of difference	t ratio	df
ZmFAR01	6h	25% vs. Control	*	0.00138267	0.164362	0.0843966	0.0101106	7.9091	4
ZmFAR01	24h	25% vs. Control	*	0.000148109	0.130362	0.0175454	0.0080187	14.0692	4
ZmFAR01	48h	25% vs. Control	*	0.000309793	0.106125	0.0225872	0.00716752	11.6551	4
ID	Time	Data sets to analyze	Significant	p value	Control_mean	Test_mean	SE of difference	t ratio	df
ZmFAR02	6h	10% vs. Control		0.116684	0.302887	0.256261	0.023363	1.99573	4
ZmFAR02	24h	10% vs. Control		0.702496	0.362553	0.378547	0.0389646	0.410471	4
ZmFAR02	48h	10% vs. Control		0.126373	0.273863	0.229169	0.0232037	1.92616	4
ID	Time	Data sets to analyze	Significant	p value	Control_mean	Test_mean	SE of difference	t ratio	df
ZmFAR02	6h	25% vs. Control	*	0.00891818	0.302887	0.208614	0.0198135	4.75802	4
ZmFAR02	24h	25% vs. Control	*	0.0119816	0.362553	0.256181	0.0243495	4.36855	4
ZmFAR02	48h	25% vs. Control	*	0.0069458	0.273863	0.171009	0.0201376	5.10759	4
ID	Time	Data sets to analyze	Significant	p value	Control_mean	Test_mean	SE of difference	t ratio	df
ZmFAR03	6h	10% vs. Control	*	0.00350036	0.990505	0.592054	0.0645614	6.17166	4
ZmFAR03	24h	10% vs. Control	*	0.00724446	0.608976	0.400349	0.0413339	5.04737	4
ZmFAR03	48h	10% vs. Control	*	0.0460068	0.740244	0.487923	0.0882756	2.85833	4
ID	Time	Data sets to analyze	Significant	p value	Control_mean	Test_mean	SE of difference	t ratio	df
ZmFAR03	6h	25% vs. Control	*	0.00135913	0.990505	0.494909	0.0623789	7.94492	4
ZmFAR03	24h	25% vs. Control	*	0.00569862	0.608976	0.389425	0.0406704	5.39831	4
ZmFAR03	48h	25% vs. Control	*	0.020573	0.740244	0.443638	0.0798509	3.7145	4
ID	Time	Data sets to analyze	Significant	p value	Control_mean	Test_mean	SE of difference	t ratio	df
ZmFAR04	6h	10% vs. Control		0.536444	0.180878	0.193524	0.0187223	0.675415	4
ZmFAR04	24h	10% vs. Control		0.199697	0.276146	0.328969	0.0344239	1.53449	4
ZmFAR04	48h	10% vs. Control		0.630849	0.25345	0.278063	0.0473811	0.519477	4
ID	Time	Data sets to analyze	Significant	p value	Control_mean	Test_mean	SE of difference	t ratio	df
ZmFAR04	6h	25% vs. Control		0.282267	0.180878	0.16143	0.0156659	1.24145	4
ZmFAR04	24h	25% vs. Control	*	0.0150768	0.276146	0.200671	0.0184909	4.08175	4
ZmFAR04	48h	25% vs. Control		0.21593	0.25345	0.205736	0.0324952	1.46834	4
ID	Time	Data sets to analyze	Significant	p value	Control_mean	Test_mean	SE of difference	t ratio	df
ZmFAR05	6h	10% vs. Control	*	0.00129546	0.392752	0.176219	0.0269125	8.04579	4
ZmFAR05	24h	10% vs. Control	*	0.0054218	0.231767	0.15247	0.0144874	5.47349	4
ZmFAR05	48h	10% vs. Control	*	0.00277079	0.242028	0.103644	0.0210497	6.57415	4
ID	Time	Data sets to analyze	Significant	p value	Control_mean	Test_mean	SE of difference	t ratio	df
ZmFAR05	6h	25% vs. Control	*	0.00137537	0.392752	0.179581	0.026915	7.92013	4
ZmFAR05	24h	25% vs. Control	*	0.00042417	0.231767	0.106307	0.0116684	10.7521	4
ZmFAR05	48h	25% vs. Control	*	0.00189915	0.242028	0.0943093	0.0203118	7.27253	4
ID	Time	Data sets to analyze	Significant	p value	Control_mean	Test_mean	SE of difference	t ratio	df
ZmFAR06	6h	10% vs. Control	*	0.00129546	0.392752	0.176219	0.0269125	8.04579	4
ZmFAR06	24h	10% vs. Control	*	0.0054218	0.231767	0.15247	0.0144874	5.47349	4
ZmFAR06	48h	10% vs. Control	*	0.00277079	0.242028	0.103644	0.0210497	6.57415	4
ID	Time	Data sets to analyze	Significant	p value	Control_mean	Test_mean	SE of difference	t ratio	df
ZmFAR06	6h	25% vs. Control	*	0.00137537	0.392752	0.179581	0.026915	7.92013	4
ZmFAR06	24h	25% vs. Control	*	0.00042417	0.231767	0.106307	0.0116684	10.7521	4
ZmFAR06	48h	25% vs. Control	*	0.00189915	0.242028	0.0943093	0.0203118	7.27253	4
ID	Time	Data sets to analyze	Significant	p value	Control_mean	Test_mean	SE of difference	t ratio	df
ZmFAR07	6h	10% vs. Control		0.373197	0.159925	0.135217	0.0246678	1.00164	4
ZmFAR07	24h	10% vs. Control		0.328102	0.186619	0.154133	0.0291887	1.11295	4
ZmFAR07	48h	10% vs. Control		0.342406	0.170183	0.142225	0.0259779	1.07623	4
ID	Time	Data sets to analyze	Significant	p value	Control_mean	Test_mean	SE of difference	t ratio	df
ZmFAR07	6h	25% vs. Control	*	0.0425755	0.159925	0.101684	0.0198395	2.9356	4
ZmFAR07	24h	25% vs. Control	*	0.00716799	0.186619	0.090955	0.0188966	5.06249	4
ZmFAR07	48h	25% vs. Control	*	0.0141609	0.170183	0.095257	0.0180171	4.15863	4
ID	Time	Data sets to analyze	Significant	p value	Control_mean	Test_mean	SE of difference	t ratio	df
ZmFAR08	6h	10% vs. Control		0.236691	0.389233	0.314362	0.0538376	1.39069	4
ZmFAR08	24h	10% vs. Control	*	0.037916	0.298338	0.228929	0.0227345	3.05302	4
ZmFAR08	48h	10% vs. Control		0.0770146	0.459311	0.334884	0.0525521	2.36769	4
ID	Time	Data sets to analyze	Significant	p value	Control_mean	Test_mean	SE of difference	t ratio	df
ZmFAR08	6h	25% vs. Control		0.0586214	0.389233	0.266835	0.0466657	2.62289	4
ZmFAR08	24h	25% vs. Control	*	0.0066267	0.298338	0.196094	0.0197552	5.17553	4
ZmFAR08	48h	25% vs. Control	*	0.022228	0.459311	0.293844	0.0456267	3.62654	4
ID	Time	Data sets to analyze	Significant	p value	Control_mean	Test_mean	SE of difference	t ratio	df
ZmFAR09	6h	10% vs. Control	*	0.000787138	0.278241	0.142937	0.0147643	9.16426	4
ZmFAR09	24h	10% vs. Control	*	0.0245265	0.159919	0.0894394	0.0200424	3.51654	4
ZmFAR09	48h	10% vs. Control	*	0.00111445	0.187511	0.0905547	0.0115842	8.36975	4
ID	Time	Data sets to analyze	Significant	p value	Control_mean	Test_mean	SE of difference	t ratio	df
ZmFAR09	6h	25% vs. Control	*	0.000807153	0.278241	0.143662	0.0147814	9.10464	4
ZmFAR09	24h	25% vs. Control	*	0.0463779	0.159919	0.0993586	0.0212465	2.85038	4
ZmFAR09	48h	25% vs. Control	*	0.00266617	0.187511	0.10706	0.0121116	6.64254	4
ID	Time	Data sets to analyze	Significant	p value	Control_mean	Test_mean	SE of difference	t ratio	df
ZmFAR10	6h	10% vs. Control		0.655252	0.20894	0.228129	0.0398437	0.481602	4
ZmFAR10	24h	10% vs. Control		0.0739491	0.184414	0.251387	0.0278467	2.40506	4
ZmFAR10	48h	10% vs. Control		0.236433	0.221969	0.299846	0.0559621	1.39161	4
ID	Time	Data sets to analyze	Significant	p value	Control_mean	Test_mean	SE of difference	t ratio	df
ZmFAR10	6h	25% vs. Control		0.424166	0.20894	0.248338	0.0443101	0.889145	4
ZmFAR10	24h	25% vs. Control		0.604644	0.184414	0.194782	0.0184766	0.561147	4
ZmFAR10	48h	25% vs. Control		0.243095	0.221969	0.299137	0.0564049	1.36811	4
ID	Time	Data sets to analyze	Significant	p value	Control_mean	Test_mean	SE of difference	t ratio	df
ZmFAR11	6h	10% vs. Control		0.0510004	0.406123	0.286625	0.0433414	2.75712	4
ZmFAR11	24h	10% vs. Control		0.680742	0.244721	0.255479	0.0242908	0.44289	4
ZmFAR11	48h	10% vs. Control		0.218415	0.339249	0.273591	0.0450121	1.45866	4
ID	Time	Data sets to analyze	Significant	p value	Control_mean	Test_mean	SE of difference	t ratio	df
ZmFAR11	6h	25% vs. Control	*	0.0194901	0.406123	0.245393	0.0425574	3.77677	4
ZmFAR11	24h	25% vs. Control	*	0.0371233	0.244721	0.189756	0.0178767	3.07468	4
ZmFAR11	48h	25% vs. Control	*	0.0382846	0.339249	0.224622	0.0376673	3.04313	4
ID	Time	Data sets to analyze	Significant	p value	Control_mean	Test_mean	SE of difference	t ratio	df
ZmFAR12	6h	10% vs. Control	*	0.00289617	0.370176	0.205269	0.0253849	6.49627	4
ZmFAR12	24h	10% vs. Control	*	0.00297617	0.284619	0.164393	0.0186434	6.44871	4
ZmFAR12	48h	10% vs. Control	*	0.0353809	0.449736	0.299134	0.0482039	3.12425	4
ID	Time	Data sets to analyze	Significant	p value	Control_mean	Test_mean	SE of difference	t ratio	df
ZmFAR12	6h	25% vs. Control	*	0.0033099	0.370176	0.210622	0.0254633	6.26604	4
ZmFAR12	24h	25% vs. Control	*	0.00221043	0.284619	0.157747	0.0181647	6.98449	4
ZmFAR12	48h	25% vs. Control	*	0.011958	0.449736	0.262489	0.0428375	4.37108	4
ID	Time	Data sets to analyze	Significant	p value	Control_mean	Test_mean	SE of difference	t ratio	df
ZmFAR13	6h	10% vs. Control	*	0.000832869	0.513873	0.226891	0.0317786	9.03068	4
ZmFAR13	24h	10% vs. Control	*	0.0351256	0.433722	0.279719	0.0491745	3.13176	4
ZmFAR13	48h	10% vs. Control	*	0.00141781	0.571142	0.323047	0.0315762	7.85701	4
ID	Time	Data sets to analyze	Significant	p value	Control_mean	Test_mean	SE of difference	t ratio	df
ZmFAR13	6h	25% vs. Control	*	0.000571946	0.513873	0.201815	0.0313475	9.9548	4
ZmFAR13	24h	25% vs. Control	*	0.00690858	0.433722	0.227723	0.040271	5.11532	4
ZmFAR13	48h	25% vs. Control	*	0.000470617	0.571142	0.267141	0.0290399	10.4684	4
ID	Time	Data sets to analyze	Significant	p value	Control_mean	Test_mean	SE of difference	t ratio	df
ZmFAR14	6h	10% vs. Control	*	0.00395129	0.519244	0.320139	0.0333437	5.97132	4
ZmFAR14	24h	10% vs. Control	*	0.0102039	0.499741	0.347163	0.0333334	4.57735	4
ZmFAR14	48h	10% vs. Control	*	0.00448509	0.47392	0.301872	0.0298297	5.76765	4
ID	Time	Data sets to analyze	Significant	p value	Control_mean	Test_mean	SE of difference	t ratio	df
ZmFAR14	6h	25% vs. Control	*	0.00195036	0.519244	0.294142	0.031172	7.22129	4
ZmFAR14	24h	25% vs. Control	*	0.000790332	0.499741	0.267492	0.0253696	9.15462	4
ZmFAR14	48h	25% vs. Control	*	0.00119271	0.47392	0.24473	0.0278743	8.22223	4
