# Supplementary material for: Comprehensive identification and expression analysis of FAR1/FHY3 genes under drought stress in maize (Zea mays L.)
Source: PeerJ. 2024 Jun 28;12:e17684. doi: 10.7717/peerj.17684 (PMC11216215; doi:10.7717/peerj.17684)
Supplement: Supplemental Information 4 [file peerj-12-17684-s004.xls]

## Sheet: Sheet1
ITEM TO CHECK	IMPORTANCE	CHECKLIST
EXPERIMENTAL DESIGN
Definition of experimental and control groups	E	We described it in "Materials and method" on line 115-125.
Number within each group	E	We described it in "Materials and method" on line 123-124.
Assay carried out by core lab or investigator's lab?	D
Acknowledgement of authors' contributions	D
SAMPLE
Description	E	We described it in "Materials and method" on line 115-125.
Volume/mass of sample processed	D
Microdissection or macrodissection	E	We described it in "Materials and method" in Fig.S1 on line 124.
Processing procedure	E	We described it in "Materials and method" on line 115-125.
If frozen - how and how quickly?	E	We described it in "Materials and method" on line 124-125.
If fixed - with what, how quickly?	E	We described it in "Materials and method" on line 123-124.
Sample storage conditions and duration (especially for FFPE samples)	E	We described it in "Materials and method" on line 125.
NUCLEIC ACID EXTRACTION
Procedure and/or instrumentation	E	We described it in "Materials and method" on line 155.
Name of kit and details of any modifications	E	We described it in "Materials and method" on line 155.
Source of additional reagents used	D
Details of DNase or RNAse treatment	E	We described it in "Materials and method" on line 156-157.
Contamination assessment (DNA or RNA)	E	We described it in "Materials and method" on line 155-156.
Nucleic acid quantification	E	We described it in "Materials and method" on line 155-156.
Instrument and method	E	We described it in "Materials and method" on line 155-156.
Purity (A260/A280)	D
Yield	D
RNA integrity method/instrument	E	We described it in "Materials and method" on line 155-157.
RIN/RQI or Cq of 3' and 5' transcripts	E	We described it in "Materials and method" on line 155-157.
Electrophoresis traces	D
Inhibition testing (Cq dilutions, spike or other)	E	We described it in "Materials and method" on line 155-157.
REVERSE TRANSCRIPTION
Complete reaction conditions	E	We described it in "Materials and method" on line 156-157.
Amount of RNA and reaction volume	E	We described it in "Materials and method" on line 156-157.
Priming oligonucleotide (if using GSP) and concentration	E	We described it in "Materials and method" on line 156-157.
Reverse transcriptase and concentration	E	We described it in "Materials and method" on line 156-157.
Temperature and time	E	We described it in "Materials and method" on line 156-157.
Manufacturer of reagents and catalogue numbers	D
Cqs with and without RT	D*
Storage conditions of cDNA	D
qPCR TARGET INFORMATION
If multiplex, efficiency and LOD of each assay.	E	We described it in "Materials and method" on line 158-160.
Sequence accession number	E	We described it in "Materials and method" on line 159 and Table S1.
Location of amplicon	D
Amplicon length	E	We described it in "Materials and method" on line 159 and supplemental data.
In silico specificity screen (BLAST, etc)	E	We described it in "Materials and method" on line 159 and supplemental data.
Pseudogenes, retropseudogenes or other homologs?	D
Sequence alignment	D
Secondary structure analysis of amplicon	D
Location of each primer by exon or intron (if applicable)	E	We described it in "Materials and method" on line 159 and supplemental data.
What splice variants are targeted?	E	We described it in "Materials and method" on line 159 and supplemental data.
qPCR OLIGONUCLEOTIDES
Primer sequences	E	We described it in "Materials and method" on line 159 and Table S1.
RTPrimerDB Identification Number	D
Probe sequences	D**
Location and identity of any modifications	E	We described it in "Materials and method" on line 159 and Table S1.
Manufacturer of oligonucleotides	D
Purification method	D
qPCR PROTOCOL
Complete reaction conditions	E	We described it in "Materials and method" on line 158-162.
Reaction volume and amount of cDNA/DNA	E	We described it in "Materials and method" on line 161.
Primer, (probe), Mg++ and dNTP concentrations	E	We described it in "Materials and method" on line 158-162.
Polymerase identity and concentration	E	We described it in "Materials and method" on line 158-162.
Buffer/kit identity and manufacturer	E	We described it in "Materials and method" on line 158-162.
Exact chemical constitution of the buffer	D
Additives (SYBR Green I, DMSO, etc.)	E	We described it in "Materials and method" on line 158-162.
Manufacturer of plates/tubes and catalog number	D
Complete thermocycling parameters	E	We described it in "Materials and method" on line 163-164.
Reaction setup (manual/robotic)	D
Manufacturer of qPCR instrument	E	We described it in "Materials and method" on line 159-160.
qPCR VALIDATION
Evidence of optimisation (from gradients)	D
Specificity (gel, sequence, melt, or digest)	E	We described it in "Materials and method" on line 164.
For SYBR Green I, Cq of the NTC	E	We described it in "Materials and method" on line 164-166.
Standard curves with slope and y-intercept	E	We described it in "Materials and method" on line 164-166.
PCR efficiency calculated from slope	E	We described it in "Materials and method" on line164-166.
Confidence interval for PCR efficiency or standard error	D
r2 of standard curve	E	We described it in "Materials and method" on line 164-166.
Linear dynamic range	E	We described it in "Materials and method" on line 164-166.
Cq variation at lower limit	E	We described it in "Materials and method" on line 164-166.
Confidence intervals throughout range	D
Evidence for limit of detection	E	We described it in "Materials and method" on line 164-166.
If multiplex, efficiency and LOD of each assay.	E	We described it in "Materials and method" on line 164-166.
DATA ANALYSIS
qPCR analysis program (source, version)	E	We described it in "Materials and method" on line 164-166.
Cq method determination	E	We described it in "Materials and method" on line 164-166.
Outlier identification and disposition	E	We described it in "Materials and method" on line 164-166.
Results of NTCs	E	We described it in "Materials and method" on line 164-166.
Justification of number and choice of reference genes	E	We described it in "Materials and method" on line 164-166.
Description of normalisation method	E	We described it in "Materials and method" on line 164-166.
Number and concordance of biological replicates	D
Number and stage (RT or qPCR) of technical replicates	E	We described it in "Materials and method" on line 164-166.
Repeatability (intra-assay variation)	E	We described it in "Materials and method" on line 164-166.
Reproducibility (inter-assay variation, %CV)	D
Power analysis	D
Statistical methods for result significance	E	We described it in "Materials and method" on line 167-168 and Fig.7 and Fig.8
Software (source, version)	E	We described it in "Materials and method" on line 167-168.
Cq or raw data submission using RDML	D
Table 1. MIQE checklist for authors, reviewers and editors. All essential information (E) must be submitted with the manuscript. Desirable
information (D) should be submitted if available. If using primers obtained from RTPrimerDB, information on qPCR target, oligonucleotides,
protocols and validation is available from that source.
*: Assessing the absence of DNA using a no RT assay is essential when first extracting RNA. Once the sample has been validated as
RDNA-free, inclusion of a no-RT control is desirable, but no longer essential.
**: Disclosure of the probe sequence is highly desirable and strongly encouraged. However, since not all commercial pre-designed assay
vendors provide this information, it cannot be an essential requirement. Use of such assays is advised against.
